# Supplementary material
Source: PubMed Central journal article supplement (PMC2772463)
Supplement: supp_191_22_7039__1.pdf [file supp_191_22_7039__1.pdf]

| Primer name                  | Gene            | Sequence                                |
|------------------------------|-----------------|-----------------------------------------|
| <u>QRT PCR</u>               |                 |                                         |
| 0076fw_qrt                   | Bbr_0076        | cagcagcgcgcatgaagac                     |
| 0076rv_qrt                   | Bbr_0076        | cactgctcatccgagtcctt                    |
| 0124fw_qrt                   | Bbr_0124        | cgtgtccgccaaggataa                      |
| 0124rv_qrt                   | Bbr_0124        | gaaccaccggatgatggtc                     |
| 0125fw_qrt                   | Bbr_0125        | catcaactaccgcaatcgtg                    |
| 0125rv_qrt                   | Bbr_0125        | tcgataatgccgtgctgac                     |
| 0126fw_qrt                   | Bbr_0126        | gcgtatccgcttctccact                     |
| 0126rv_qrt                   | Bbr_0126        | accgaacatcgagaagatgtc                   |
| 0127fw_qrt                   | Bbr_0127        | ctattgcctcgcgtgacattg                   |
| 0127rv_qrt                   | Bbr_0127        | ctcctcttcgaggacccaaa                    |
| 0216fw_qrt                   | Bbr_0216        | cggattggccacttctca                      |
| 0216rv_qrt                   | Bbr_0216        | gagtagcccagttcattgaagg                  |
| 0496fw_qrt                   | Bbr_0496        | aatcagtcggtgatggaattg                   |
| 0496rv_qrt                   | Bbr_0496        | cgggcaaatctcgcataa                      |
| 0585fw_qrt                   | Bbr_0585        | ccgctgatgacagagatgg                     |
| 0585rv_qrt                   | Bbr_0585        | gttgcggccgaatattatgt                    |
| 0794fw_qrt                   | Bbr_0794        | tctacgacacccatgcagctc                   |
| 0794rv_qrt                   | Bbr_0794        | taacgcttgcccttgggtg                     |
| 0795fw_qrt                   | Bbr_0795        | gaaatccaggccaaggaaat                    |
| 0795rv_qrt                   | Bbr_0795        | gtcctgaccgggtgtgattg                    |
| 1004fw_qrt                   | Bbr_1004        | cgctcgcatcgtggtactg                     |
| 1004rv_qrt                   | Bbr_1004        | ctacgggctcttgcgaaac                     |
| 1005fw_qrt                   | Bbr_1005        | ggaagtgaacaacgcctacg                    |
| 1005rv_qrt                   | Bbr_1005        | caacgcgggaatcatacata                    |
| 1013fw_qrt                   | Bbr_1013        | atggagcaggatcattgaagg                   |
| 1013rv_qrt                   | Bbr_1013        | gttgtcctcgcaggcttc                      |
| 1014fw_qrt                   | Bbr_1014        | aggacatgaactacggcaca                    |
| 1014rv_qrt                   | Bbr_1014        | acaccatgcgcaatgattc                     |
| 1046fw_qrt                   | Bbr_1046        | gcttatcggatcgcatattgt                   |
| 1046rv_qrt                   | Bbr_1046        | tcctcatgggagcgttcc                      |
| 1171fw_qrt                   | Bbr_1171        | gattggaagaagggtctcaa                    |
| 1171rv_qrt                   | Bbr_1171        | taatggcctgacgaatccac                    |
| 1180fw_qrt                   | Bbr_1180        | ccgcaaaacacgtggact                      |
| 1180rv_qrt                   | Bbr_1180        | gtaggggttccgggctgt                      |
| 1181fw_qrt                   | Bbr_1181        | gaatcgtccggtaaaaccac                    |
| 1181rv_qrt                   | Bbr_1181        | gtgctcggcgtcaatgtat                     |
| 1182fw_qrt                   | Bbr_1182        | gtgcggttcttctgtcc                       |
| 1182rv_qrt                   | Bbr_1182        | aaattcccgttcacgcatac                    |
| 1183fw_qrt                   | Bbr_1183        | aaggccaaggatgaacgtc                     |
| 1183rv_qrt                   | Bbr_1183        | gctggtatgaggcggattc                     |
| 1271fw_qrt                   | Bbr_1271        | cagaactccgcgtgaac                       |
| 1271rv_qrt                   | Bbr_1271        | ttgoggaaggtcttgacagt                    |
| 1356fw_qrt                   | Bbr_1356        | ctggctctgacggtgagg                      |
| 1356rv_qrt                   | Bbr_1356        | aggcttcggctctgttcagc                    |
| 1364fw_qrt                   | Bbr_1364        | gtctccaaggacgagaccac                    |
| 1364rv_qrt                   | Bbr_1364        | gcgagcgtcgatgtcttc                      |
| 1668fw_qrt                   | Bbr_1668        | gttcactacgagggtaggact                   |
| 1668rv_qrt                   | Bbr_1668        | ccgagaatggcaagaatgtc                    |
| 1781fw_qrt                   | Bbr_1781        | acaaggccatcgatctggt                     |
| 1781rv_qrt                   | Bbr_1781        | gaggagtcgagctccatacg                    |
| gusafw_qrt                   | gusA            | ctgatagcgcgtgacaaaaa                    |
| gusarv_qrt                   | gusA            | cggttcgttggcaatactc                     |
| recAigfw_qrt                 | recA_intergenic | gccgcgctgcccgctgcg                      |
| recAigrv_qrt                 | recA_intergenic | ttctccttatcgaagtctgatgc                 |
| rnpA_fw                      | rnpA            | gcategttctcatcgttgg                     |
| rnpA_rv                      | rnpA            | cgcttacgagccaattt                       |
| <u>Overexpression pQE</u>    |                 |                                         |
| hrcA_fw_bfuA1                | hrcA            | gcgcacctgccgcgatgacgcaatcacgtcg         |
| hrcA_rv_bgIII                | hrcA            | cgcgagatctgtcccgagccgctttccg            |
| clgR-TrunFw                  | ClgR-T          | ggaggatccatgggttcttgcggtgctatcggccatgtg |
| clgR-TrunRv                  | ClgR-T /ClgR    | ggaaaagctcgttcccggccctcatctcccacag      |
| clgR-fw                      | ClgR            | cgcggatccggctcatcgtgtt gtactaag         |
| <u>Promoter probe pNZ272</u> |                 |                                         |
| PgroEL_fw_pstI               | PgroEL          | gcatecgtcagggatctttgccatggttgtg         |
| PgroEL_rv_bamH1              | PgroEL          | gcatecggatccgctctgaaatgagcaagcg         |
| PrbsA1_fw_bamH1              | PrbsA1          | cgggatcccggctcaatagtccttcgcc            |
| PrbsA1_rv_sca1               | PrbsA1          | gcagtaactacgcctctcgttctcgtcattggggc     |

## EMSA

|               |                        |                                                                |
|---------------|------------------------|----------------------------------------------------------------|
| Pclgr_fw      | PclgR                  | ggtcacatcggtcccatcgcc                                          |
| Pclgr_rv      | PclgR                  | cgagatagtcaggccggtcg                                           |
| PclpB_fw      | PclpB                  | gtcaacccccaaacagac                                             |
| PclpB_rv      | PclpB                  | gtggtgaacttctgttcc                                             |
| PclpB_fw_mut3 | PclpB 3' mutation      | cttcctcactcgaaaacctgcccgggttccaaaacttgagtcacttacactcaacggggggg |
| PclpB_fw_mut5 | PclpB 5' mutation      | cttcctcactcgaaaacctgcccgggttccggggcttgagtcacttacactcaacttttggg |
| PclpB_fw_wt   | PclpB without mutation | cttcctcactcgaaaacctgcccggg                                     |
| PclpC_fw      | PclpC                  | agccatccacaccaacaag                                            |
| PclpC_rv      | PclpC                  | cgaacatgcttgtccttc                                             |
| PclpCmut1     | PclpC mutation         | cgtttttcttctcctctcacggcgcaattcatgg                             |
| PclpCmut10    | PclpC mutation         | cgtttttcttctcctctcacgtcgcaattcatgg                             |
| PclpCmut11    | PclpC mutation         | cgtttttcttctcctctcacgtcgcaattcatgg                             |
| PclpCmut12    | PclpC mutation         | cgtttttcttctcctctcacggagcaattcatgg                             |
| PclpCmut13    | PclpC mutation         | cgtttttcttctcctctcacggctcaattcatgg                             |
| PclpCmut14    | PclpC mutation         | cgtttttcttctcctctcacggcgcaattcatgg                             |
| PclpCmut15    | PclpC mutation         | cgtttttcttctcctctcacggcgcaattcatgg                             |
| PclpCmut16    | PclpC mutation         | cgtttttcttctcctctcacggcgcaattcatgg                             |
| PclpCmut2     | PclpC mutation         | cgtttttcttctcactctcacggcgcaattcatgg                            |
| PclpCmut3     | PclpC mutation         | cgtttttcttctcactctcacggcgcaattcatgg                            |
| PclpCmut4     | PclpC mutation         | cgtttttcttctccgctcacggcgcaattcatgg                             |
| PclpCmut5     | PclpC mutation         | cgtttttcttctcctatcacggcgcaattcatgg                             |
| PclpCmut6     | PclpC mutation         | cgtttttcttctcctctcgacggcgcaattcatgg                            |
| PclpCmut7     | PclpC mutation         | cgtttttcttctcctctaacggcgcaattcatgg                             |
| PclpCmut8     | PclpC mutation         | cgtttttcttctcctctcccggcgcaattcatgg                             |
| PclpCmut9     | PclpC mutation         | cgtttttcttctcctctcaaggcgcaattcatgg                             |
| PclpCWT       | PclpC without mutation | cgtttttcttctcctctcacggcgcaattcatgg                             |
| PclpP1_fw     | PclpP1                 | tctcgaataaacctccctctgac                                        |
| PclpP1_rv     | PclpP1                 | caaaggcattgctcaccttg                                           |
| PdnaK_fw      | PdnaK                  | gagggctccgaacagtag                                             |
| PdnaK_rv      | PdnaK                  | ctccttaatttatcgtttgttc                                         |
| PgroEL_fw     | PgroEL                 | gctctgaatgagcaagcg                                             |
| PgroEL_rv     | PgroEL                 | gatccttgccatggttggtg                                           |
| Phsp10_fw     | PgroES                 | gcaactaagggatttctc                                             |
| Phsp10_rv     | PgroES                 | gtgtgagcttaatcgacac                                            |
| PhrcA_fw      | phrcA                  | ggtcgggcccggtatccgg                                            |
| PhrcA_rv      | phrcA                  | gattgctgatgcccgcctc                                            |
| PhrdB_fw      | PhrdB                  | gcttggtgctcggggtag                                             |
| PhrdB_rv      | PhrdB                  | gggcacacttctggcaagg                                            |
| Pnfo_fw       | Pnfo                   | gtcgtccttgggattgccc                                            |
| Pnfo_rv       | Pnfo                   | gccgtcgacaaatgcgatc                                            |
