# Supplementary material
Source: PubMed Central journal article supplement (PMC2772463)
Supplement: supp_191_22_7039__3.pdf [file supp_191_22_7039__3.pdf]

|          |       |         |         |         |         |         |         |         |          |         |         |        |          |         |
|----------|-------|---------|---------|---------|---------|---------|---------|---------|----------|---------|---------|--------|----------|---------|
| Bbr_0084 |       | 378.2   | 273.1   | 347.4   | 308.3   | 303.7   | 283.3   | 412.9   | 795.6    | 1508.8  | 690.1   | 183.4  | 477.9    | 522.4   |
| Bbr_0085 |       | 480.9   | 406.8   | 266.0   | 207.9   | 266.0   | 210.2   | 353.1   | 465.5    | 977.9   | 411.8   | 445.2  | 159.0    | 488.3   |
| Bbr_0086 |       | 106.2   | 85.7    | 88.8    | 92.6    | 104.4   | 125.2   | 136.7   | 232.4    | 1185.5  | 465.2   | 19.4   | 18.7     | 273.5   |
| Bbr_0087 |       | 506.0   | 747.4   | 440.5   | 1065.3  | 338.6   | 4560.3  | 358.2   | 3455.3   | 856.2   | 1187.8  | 349.1  | 10444.4  | 474.8   |
| Bbr_0088 | tgt   | 499.0   | 577.8   | 395.1   | 355.6   | 333.9   | 177.7   | 461.3   | 441.1    | 1264.5  | 1333.2  | 752.4  | 1220.4   | 617.7   |
| Bbr_0089 | degP  | 4766.6  | 4903.9  | 4975.8  | 8414.7  | 3929.8  | 17989.7 | 2390.1  | 2421.1   | 6524.1  | 23316.5 | 2097.0 | 4014.6   | 4193.4  |
| Bbr_0090 |       | 458.7   | 269.8   | 368.5   | 225.5   | 263.3   | 829.3   | 316.1   | 717.9    | 1063.9  | 843.8   | 206.6  | 65.9     | 446.0   |
| Bbr_0091 | fprA  | 3931.2  | 5180.6  | 3401.0  | 4932.5  | 2642.4  | 1222.2  | 3388.9  | 1356.9   | 5157.8  | 3905.3  | 5291.1 | 4186.4   | 3968.8  |
| Bbr_0092 | htpX  | 9115.4  | 6285.8  | 9631.2  | 7628.8  | 15015.1 | 10153.8 | 14435.6 | 16393.8  | 7081.0  | 10995.2 | 2347.7 | 2203.8   | 9604.3  |
| Bbr_0093 |       | 326.2   | 368.8   | 272.2   | 371.4   | 236.8   | 285.8   | 303.1   | 366.8    | 1133.0  | 800.3   | 215.7  | 1232.6   | 414.5   |
| Bbr_0094 | fta   | 2342.1  | 2376.3  | 2168.8  | 2388.7  | 2482.4  | 1732.5  | 2683.0  | 2853.9   | 1951.0  | 3676.4  | 1492.8 | 1371.6   | 2186.7  |
| Bbr_0095 | purA  | 3540.3  | 3945.0  | 3134.0  | 3100.9  | 2362.6  | 1646.2  | 2506.4  | 1071.0   | 4509.5  | 3445.6  | 4115.9 | 2660.1   | 3361.4  |
| Bbr_0096 |       | 722.0   | 611.9   | 566.5   | 494.8   | 340.6   | 286.0   | 383.5   | 206.8    | 841.7   | 636.2   | 510.3  | 429.5    | 560.8   |
| Bbr_0097 | crb1  | 1281.8  | 912.4   | 965.8   | 662.5   | 1035.5  | 1660.6  | 1191.1  | 3351.5   | 1273.0  | 851.2   | 335.7  | 913.5    | 1113.8  |
| Bbr_0098 | crb2  | 473.4   | 366.4   | 370.2   | 232.8   | 394.0   | 344.7   | 403.0   | 441.2    | 1245.3  | 600.5   | 647.9  | 473.7    | 589.0   |
| Bbr_0099 | scrR1 | 267.6   | 169.9   | 137.0   | 112.7   | 132.3   | 134.2   | 160.8   | 631.0    | 841.6   | 472.2   | 102.2  | 75.0     | 273.6   |
| Bbr_0100 | scrP  | 371.6   | 307.1   | 299.8   | 168.3   | 214.5   | 361.1   | 271.3   | 322.6    | 1296.8  | 825.9   | 263.1  | 837.4    | 452.8   |
| Bbr_0101 | scrT  | 856.5   | 735.7   | 811.5   | 1089.7  | 418.9   | 767.0   | 443.9   | 410.8    | 1357.6  | 1598.1  | 432.9  | 370.5    | 720.2   |
| Bbr_0102 | scrR2 | 355.4   | 363.0   | 294.5   | 298.8   | 297.0   | 419.4   | 371.2   | 715.4    | 1241.5  | 1457.5  | 330.8  | 319.5    | 481.7   |
| Bbr_0103 |       | 224.8   | 190.6   | 171.8   | 190.6   | 194.2   | 76.5    | 271.4   | 409.7    | 1113.5  | 412.1   | 70.2   | 121.9    | 341.0   |
| Bbr_0104 | ilvC1 | 9723.2  | 5732.0  | 9272.2  | 2250.8  | 11000.4 | 619.5   | 15838.4 | 3539.6   | 2006.1  | 1072.3  | 5523.9 | 537.5    | 8210.7  |
| Bbr_0105 | cebR  | 1947.3  | 1604.1  | 1677.1  | 1014.7  | 1166.7  | 989.3   | 1220.6  | 807.2    | 4415.4  | 2337.5  | 1514.2 | 1070.6   | 1990.2  |
| Bbr_0106 | cebE  | 507.9   | 261.5   | 399.0   | 57.2    | 421.0   | 595.4   | 523.7   | 304.6    | 778.0   | 239.7   | 516.5  | 580.9    | 580.9   |
| Bbr_0107 | cebF  | 631.7   | 316.4   | 517.8   | 84.8    | 319.2   | 290.1   | 391.1   | 86.4     | 1723.0  | 239.9   | 1163.1 | 760.5    | 791.0   |
| Bbr_0108 | cebG  | 302.1   | 167.8   | 286.8   | 239.7   | 102.7   | 46.3    | 286.8   | 92.3     | 923.3   | 157.2   | 520.6  | 294.9    | 415.5   |
| Bbr_0109 | agl1  | 350.5   | 180.8   | 284.0   | 67.1    | 386.6   | 190.1   | 448.3   | 844.3    | 1281.9  | 321.2   | 680.6  | 568.9    | 572.0   |
| Bbr_0110 | ivc2  | 2152.1  | 1186.4  | 1271.0  | 441.8   | 865.7   | 674.1   | 981.0   | 853.5    | 1415.2  | 1062.1  | 1097.3 | 536.3    | 1297.0  |
| Bbr_0111 | agl2  | 678.8   | 543.5   | 457.7   | 453.1   | 534.4   | 467.4   | 634.4   | 467.4    | 1613.3  | 1822.3  | 354.8  | 354.8    | 746.6   |
| Bbr_0112 |       | 413.9   | 499.8   | 357.7   | 474.7   | 245.0   | 399.7   | 287.6   | 444.3    | 779.0   | 1039.0  | 153.9  | 84.1     | 372.9   |
| Bbr_0113 |       | 473.8   | 399.4   | 318.5   | 309.8   | 445.4   | 558.8   | 485.5   | 1035.1   | 900.4   | 760.9   | 146.1  | 162.4    | 461.6   |
| Bbr_0114 |       | 657.8   | 552.6   | 516.2   | 358.3   | 501.9   | 316.1   | 719.7   | 917.9    | 1149.6  | 858.5   | 216.7  | 60.5     | 627.0   |
| Bbr_0115 |       | 79.5    | 67.7    | 64.9    | 34.5    | 57.6    | 24.9    | 73.9    | 72.5     | 653.6   | 672.8   | 41.6   | 19.4     | 161.9   |
| Bbr_0116 | malQ1 | 5535.2  | 2651.9  | 5275.8  | 889.5   | 3504.7  | 814.4   | 3956.4  | 1011.0   | 3552.1  | 3895.3  | 1467.9 | 1117.0   | 3882.0  |
| Bbr_0117 | agl3  | 3141.6  | 2358.0  | 2914.3  | 565.7   | 1517.9  | 301.6   | 1525.9  | 318.5    | 1210.8  | 495.4   | 76.5   | 77.9     | 1731.2  |
| Bbr_0118 | malE  | 27952.2 | 9320.2  | 26498.4 | 32849.4 | 38946.0 | 3718.2  | 38976.4 | 3064.7   | 14213.7 | 2971.4  | 944.8  | 22355.7  | 22355.7 |
| Bbr_0119 | malC  | 5307.8  | 1685.6  | 5142.8  | 404.4   | 4222.1  | 355.4   | 5056.1  | 1125.5   | 4257.5  | 1135.7  | 105.3  | 130.7    | 4015.3  |
| Bbr_0120 | malG  | 4250.3  | 1361.1  | 3549.5  | 288.6   | 2197.5  | 331.0   | 2325.2  | 510.4    | 3780.9  | 1197.9  | 68.3   | 76.4     | 2895.3  |
| Bbr_0121 |       | 2566.4  | 838.0   | 2064.3  | 282.9   | 1687.0  | 529.0   | 2366.6  | 1289.7   | 2155.0  | 1152.6  | 57.0   | 61.7     | 1816.0  |
| Bbr_0122 |       | 1300.8  | 1372.6  | 1279.2  | 1902.9  | 829.5   | 2168.1  | 815.7   | 1316.3   | 4293.2  | 2903.2  | 493.7  | 4034.1   | 1502.0  |
| Bbr_0123 | apuB  | 3700.4  | 974.7   | 3437.4  | 384.9   | 2880.8  | 682.7   | 3058.4  | 1786.8   | 2180.9  | 2013.3  | 236.1  | 201.3    | 7182.2  |
| Bbr_0124 | dnaK  | 5669.3  | 19564.7 | 6184.0  | 44233.0 | 9535.0  | 56260.4 | 7110.8  | 191102.1 | 7259.2  | 31695.6 | 6970.7 | 117042.2 | 17118.2 |
| Bbr_0125 | grpE  | 6379.9  | 20356.1 | 6406.8  | 20356.1 | 10874.9 | 65406.0 | 7759.5  | 276921.5 | 7759.5  | 32879.3 | 6361.8 | 7892.6   | 7892.6  |
| Bbr_0126 | dnaJ1 | 2138.7  | 7656.7  | 2380.6  | 19647.3 | 2307.3  | 22589.1 | 2570.0  | 6001.3   | 2985.1  | 5365.6  | 3796.5 | 6255.2   | 2696.0  |
| Bbr_0127 | hspR  | 706.1   | 1752.9  | 770.4   | 9307.4  | 1216.9  | 9307.4  | 1230.6  | 29283.5  | 1251.0  | 2580.9  | 1157.7 | 18358.6  | 1055.4  |
| Bbr_0129 | fabG  | 148.4   | 153.1   | 132.9   | 160.1   | 95.1    | 258.2   | 117.2   | 1030.2   | 1584.5  | 822.5   | 121.0  | 1966.1   | 366.5   |
| Bbr_0130 | dedA1 | 1258.1  | 1337.9  | 1049.6  | 1097.6  | 675.2   | 1270.6  | 738.4   | 1497.9   | 2129.7  | 3152.8  | 1109.2 | 1929.5   | 1160.0  |
| Bbr_0131 |       | 837.0   | 778.8   | 682.6   | 822.2   | 449.5   | 626.7   | 535.4   | 482.1    | 2013.6  | 1366.4  | 630.1  | 514.9    | 858.0   |
| Bbr_0132 |       | 51.8    | 36.0    | 48.2    | 38.9    | 54.0    | 80.5    | 67.8    | 666.1    | 707.5   | 271.8   | 19.8   | 113.3    | 158.2   |
| Bbr_0133 |       | 36.6    | 34.1    | 23.9    | 24.5    | 26.1    | 48.7    | 32.4    | 262.4    | 643.5   | 219.1   | 11.5   | 71.2     | 129.0   |
| Bbr_0134 |       | 289.8   | 242.3   | 231.3   | 238.3   | 286.5   | 442.9   | 287.7   | 628.0    | 811.9   | 292.9   | 189.5  | 152.1    | 347.8   |
| Bbr_0135 |       | 40.6    | 28.7    | 34.4    | 29.3    | 47.6    | 37.1    | 68.4    | 441.9    | 725.0   | 266.4   | 14.2   | 28.7     | 155.0   |
| Bbr_0136 |       | 31.1    | 31.0    | 18.7    | 21.2    | 21.4    | 26.6    | 27.0    | 101.8    | 538.6   | 215.4   | 12.9   | 18.1     | 108.3   |
| Bbr_0137 |       | 127.3   | 109.4   | 88.2    | 57.3    | 98.8    | 119.8   | 126.4   | 726.0    | 978.3   | 284.6   | 73.3   | 248.7    | 248.7   |
| Bbr_0138 |       | 196.1   | 164.7   | 242.8   | 235.8   | 194.7   | 312.9   | 235.3   | 857.0    | 734.4   | 372.9   | 95.9   | 54.7     | 283.2   |
| Bbr_0139 |       | 287.1   | 298.2   | 253.5   | 251.9   | 254.1   | 711.0   | 254.1   | 1353.9   | 1420.3  | 1780.5  | 231.1  | 63.5     | 449.7   |
| Bbr_0140 |       | 280.4   | 272.1   | 223.2   | 252.5   | 145.7   | 305.9   | 172.8   | 166.9    | 1569.2  | 1282.9  | 231.2  | 103.3    | 437.1   |
| Bbr_0141 | dnaX  | 927.6   | 968.3   | 936.3   | 863.3   | 863.3   | 222.5   | 446.9   | 253.9    | 2288.5  | 2412.2  | 780.4  | 470.9    | 923.8   |
| Bbr_0142 | recR  | 1196.9  | 1086.9  | 932.2   | 864.1   | 576.9   | 700.6   | 619.5   | 835.6    | 2286.4  | 1711.3  | 827.2  | 448.5    | 1073.2  |
| Bbr_0144 |       | 542.7   | 387.9   | 426.4   | 203.2   | 295.5   | 52.4    | 388.6   | 116.5    | 1775.0  | 647.5   | 582.5  | 128.1    | 668.4   |
| Bbr_0145 |       | 51.5    | 42.5    | 31.2    | 29.8    | 46.8    | 27.7    | 64.5    | 201.7    | 775.4   | 239.0   | 27.1   | 39.4     | 166.1   |
| Bbr_0146 |       | 22.0    | 23.8    | 17.7    | 24.1    | 12.8    | 26.6    | 14.2    | 159.8    | 498.3   | 281.9   | 9.6    | 13.0     | 95.8    |
| Bbr_0147 | askA  | 1678.7  | 2052.4  | 1366.7  | 1571.6  | 1134.5  | 1309.7  | 1428.0  | 2275.4   | 1445.4  | 1300.7  | 1233.0 | 322.9    | 1381.0  |
| Bbr_0148 | askB  | 2393.1  | 3681.8  | 2085.3  | 2821.6  | 1410.1  | 453.9   | 1691.0  | 557.5    | 1567.3  | 1191.7  | 1494.6 | 333.0    | 1773.6  |
| Bbr_0149 | asd   | 2340.8  | 1849.9  | 1893.5  | 1191.7  | 1630.9  | 1237.9  | 1796.7  | 910.4    | 2109.9  | 1788.5  | 2025.8 | 732.4    | 1961.1  |
| Bbr_0150 |       | 1513.2  | 1534.5  | 1310.5  | 1210.5  | 652.4   | 2275.4  | 2087.1  | 2087.1   | 2368.5  | 1947.7  | 1122.7 | 330.3    | 1786.1  |
| Bbr_0153 |       | 457.0   | 468.8   | 346.1   | 604.4   | 356.9   | 3954.0  | 454.3   | 18324.3  | 2523.1  | 1818.2  | 202.2  | 1062.0   | 723.3   |
| Bbr_0154 |       | 97.6    | 119.9   | 76.8    | 131.0   | 269.9   | 73.2    | 100.9   | 639.1    | 1942.8  | 732.0   | 48.1   | 185.7    | 389.9   |
| Bbr_0155 |       | 159.1   | 220.3   | 126.5   | 200.4   | 86.5    | 74.6    | 113.4   | 70.9     | 1665.4  | 580.7   | 158.0  | 196.5    | 384.8   |
| Bbr_0156 |       | 189.9   | 258.1   | 156.6   | 248.9   | 165.7   | 90.5    | 173.3   | 464.4    | 1944.0  | 572.6   | 193.1  | 196.5    | 470.4   |
| Bbr_0157 |       | 302.2   | 356.7   | 277.3   | 433.0   | 178.6   | 1926.3  | 185.5   | 1676.2   | 1840.5  | 1510.3  | 318.5  | 416.4    | 517.1   |
| Bbr_0158 |       | 27.3    | 30.3    | 23.7    | 34.7    | 34.7    | 130.7   | 34.5    | 183.4    | 96.3    | 72.8    | 8.7    | 171.8    | 171.8   |
| Bbr_0160 |       | 278.2   | 180.6   | 229.2   | 89.6    | 193.1   | 368.8   | 259.0   | 615.1    | 285.0   | 785.1   | 190.4  | 181.7    | 239.1   |
| Bbr_0161 |       | 647.6   | 504.6   | 529.3   | 414.7   | 322.1   | 731.8   | 378.6   | 774.9    | 509.9   | 765.2   | 413.7  | 364.8    | 466.9   |
| Bbr_0162 |       | 3607.9  | 2885.2  | 3071.0  | 2851.1  | 3372.0  | 3158.5  | 2425.2  | 18353.0  | 2425.2  | 1636.3  | 3404.8 | 4513.8   | 3143.3  |
| Bbr_0163 |       | 1546.3  | 1223.5  | 1289.7  | 1170.3  | 1572.4  | 1666.8  | 1605.5  | 2835.1   | 762.3   | 591.4   | 518.0  | 357.1    | 1215.7  |
| Bbr_0164 | oppA1 | 519.8   | 196.3   | 505.1   | 63.9    | 242.8   | 450.9   | 269.8   | 396.6    | 999.1   | 594.3   | 425.3  | 675.3    | 535.3   |
| Bbr_0165 | oppB1 | 333.6   | 103.9   | 276.1   | 32.4    | 305.1   | 107.4   | 414.4   | 113.6    | 832.6   | 420.0   | 368.0  | 243.2    | 421.7   |
| Bbr_0166 | oppD1 | 229.8   | 103.8   | 213.7   | 130.7   | 162.7   | 162.7   | 162.7   | 162.7    | 162.7   | 162.7   | 162.7  | 162.7    | 314.0   |
| Bbr_0167 | oppF1 | 469.2   | 248.4   | 412.9   | 172.1   | 309.8   | 427.5   | 345.2   | 580.4    | 664.1   | 689.2   | 438.8  | 451.0    | 440.0   |

|          |       |         |         |         |         |          |        |          |         |         |         |         |         |         |
|----------|-------|---------|---------|---------|---------|----------|--------|----------|---------|---------|---------|---------|---------|---------|
| Bbr_0168 | nanA  | 726.7   | 454.2   | 651.9   | 320.5   | 1026.3   | 413.0  | 835.8    | 680.6   | 850.3   | 770.1   | 927.0   | 794.9   | 836.3   |
| Bbr_0169 | nagB1 | 865.3   | 533.7   | 711.5   | 619.0   | 520.2    | 1352.9 | 721.5    | 1156.1  | 1157.8  | 849.7   | 870.2   | 611.1   | 824.2   |
| Bbr_0171 |       | 367.5   | 225.9   | 301.7   | 151.5   | 240.9    | 288.5  | 335.0    | 812.0   | 1196.0  | 655.7   | 328.4   | 248.7   | 461.6   |
| Bbr_0172 |       | 263.4   | 270.1   | 229.2   | 501.2   | 297.2    | 501.2  | 149.9    | 1144.7  | 1171.9  | 1643.5  | 246.6   | 275.0   | 364.5   |
| Bbr_0173 |       | 1121.0  | 753.5   | 1038.8  | 914.0   | 655.0    | 2452.2 | 601.4    | 335.8   | 2153.2  | 6037.3  | 665.6   | 1445.2  | 1039.2  |
| Bbr_0174 |       | 1045.7  | 1175.2  | 921.3   | 921.3   | 535.9    | 895.3  | 543.9    | 991.7   | 896.9   | 2055.5  | 833.7   | 532.4   | 794.6   |
| Bbr_0175 | leuA  | 3100.8  | 3329.4  | 2930.4  | 2462.8  | 2462.8   | 1859.1 | 1433.1   | 683.1   | 2183.3  | 3153.5  | 2623.1  | 1849.5  | 2301.8  |
| Bbr_0176 | pbp2  | 2588.4  | 2958.1  | 2675.4  | 3653.7  | 2857.5   | 1218.8 | 2679.1   | 2226.5  | 2875.6  | 7792.6  | 1481.3  | 2491.6  | 2526.2  |
| Bbr_0177 |       | 2889.2  | 2969.1  | 3891.0  | 3118.7  | 2527.4   | 2468.8 | 2598.0   | 4261.5  | 1911.0  | 3037.4  | 2331.3  | 5413.2  | 2691.3  |
| Bbr_0178 | topA  | 1912.6  | 2449.7  | 1873.3  | 1885.1  | 852.9    | 284.6  | 862.0    | 372.8   | 2469.3  | 3472.1  | 1981.8  | 1615.4  | 1658.6  |
| Bbr_0179 | tmk   | 378.8   | 379.7   | 315.4   | 374.0   | 177.8    | 101.8  | 202.6    | 217.3   | 728.0   | 1478.9  | 361.3   | 766.7   | 360.7   |
| Bbr_0180 |       | 1077.1  | 847.6   | 984.1   | 934.0   | 952.2    | 847.4  | 1072.3   | 2112.7  | 1045.8  | 1305.0  | 871.1   | 742.5   | 1000.4  |
| Bbr_0181 |       | 3121.8  | 1722.9  | 2959.5  | 879.8   | 2123.4   | 2379.1 | 2210.6   | 3694.3  | 2099.0  | 1129.4  | 5327.4  | 9513.6  | 2640.2  |
| Bbr_0182 |       | 82452.0 | 31510.6 | 89947.4 | 12847.3 | 109042.6 | 6942.9 | 125068.3 | 19638.7 | 30977.6 | 4499.7  | 58294.3 | 23355.0 | 82463.7 |
| Bbr_0183 |       | 11799.7 | 7471.4  | 11579.1 | 3708.8  | 9559.6   | 4401.7 | 8631.3   | 6599.0  | 5132.1  | 3141.0  | 9258.8  | 7555.6  | 9328.8  |
| Bbr_0184 |       | 20.7    | 21.8    | 31.9    | 89.1    | 27.0     | 89.1   | 27.6     | 308.1   | 643.1   | 562.1   | 12.4    | 25.2    | 125.8   |
| Bbr_0185 |       | 158.7   | 118.8   | 117.8   | 92.7    | 109.9    | 693.9  | 127.2    | 958.1   | 1180.8  | 530.3   | 197.7   | 1360.7  | 315.4   |
| Bbr_0186 |       | 4339.6  | 4814.5  | 3970.7  | 4796.6  | 2876.5   | 3097.9 | 2565.6   | 3829.3  | 4490.5  | 5148.5  | 2660.1  | 1513.9  | 3483.8  |
| Bbr_0187 | pepD  | 4120.7  | 5939.6  | 3584.0  | 4406.3  | 2070.1   | 1411.0 | 2068.3   | 1112.2  | 2588.4  | 4190.6  | 2916.4  | 3049.4  | 2891.3  |
| Bbr_0188 | fts   | 4986.5  | 7200.0  | 4327.4  | 7141.9  | 3304.5   | 2954.9 | 2928.2   | 1524.7  | 3751.2  | 5511.2  | 3212.1  | 3343.7  | 3751.6  |
| Bbr_0189 |       | 8009.5  | 6905.1  | 6999.5  | 4183.5  | 4195.2   | 2074.1 | 3998.9   | 1553.3  | 7146.7  | 4967.5  | 5765.8  | 2096.2  | 6019.2  |
| Bbr_0190 |       | 1440.2  | 1739.2  | 1123.6  | 1727.4  | 959.3    | 1376.8 | 1129.5   | 1243.6  | 1706.5  | 1092.7  | 1352.4  | 1479.3  | 1285.2  |
| Bbr_0191 |       | 676.1   | 909.9   | 565.3   | 680.8   | 1039.6   | 609.9  | 813.9    | 1109.1  | 1009.8  | 675.1   | 229.5   | 118.0   | 660.7   |
| Bbr_0192 | gpm1  | 333.1   | 347.8   | 279.1   | 259.7   | 260.1    | 168.4  | 335.4    | 361.7   | 707.3   | 1092.6  | 304.5   | 294.6   | 369.9   |
| Bbr_0193 |       | 1502.0  | 1053.6  | 1307.9  | 533.3   | 932.6    | 482.0  | 1127.7   | 729.1   | 2563.9  | 2145.6  | 1652.7  | 1184.7  | 1514.5  |
| Bbr_0194 |       | 226.6   | 123.4   | 196.1   | 47.1    | 190.2    | 156.4  | 261.6    | 996.0   | 687.9   | 616.6   | 251.2   | 193.6   | 292.7   |
| Bbr_0195 |       | 5311.9  | 3916.9  | 4695.7  | 1777.3  | 4287.9   | 1055.9 | 5036.7   | 1802.5  | 1321.1  | 829.5   | 1111.3  | 686.1   | 3627.4  |
| Bbr_0196 |       | 2532.3  | 2852.3  | 2252.3  | 3205.3  | 1529.3   | 2226.3 | 1763.8   | 5465.3  | 2931.3  | 5465.3  | 3494.9  | 1645.3  | 2352.3  |
| Bbr_0197 | gltX1 | 246.3   | 317.2   | 204.4   | 323.0   | 278.9    | 981.7  | 336.6    | 1329.7  | 838.6   | 900.8   | 310.7   | 555.8   | 369.2   |
| Bbr_0198 |       | 277.6   | 292.3   | 294.4   | 425.8   | 264.4    | 1053.7 | 251.6    | 510.0   | 634.3   | 993.1   | 294.5   | 814.5   | 336.1   |
| Bbr_0199 |       | 1739.6  | 2850.2  | 1470.1  | 2951.5  | 1659.5   | 9567.5 | 1735.5   | 14887.7 | 5077.6  | 3856.4  | 2240.3  | 6507.6  | 2320.4  |
| Bbr_0200 |       | 111.2   | 139.5   | 80.1    | 112.9   | 83.8     | 128.8  | 117.0    | 396.5   | 1494.8  | 650.0   | 128.0   | 192.3   | 335.8   |
| Bbr_0201 |       | 51.8    | 40.3    | 35.2    | 52.0    | 36.5     | 38.5   | 45.2     | 88.0    | 847.0   | 463.4   | 34.4    | 61.3    | 175.0   |
| Bbr_0202 |       | 62.7    | 61.3    | 58.4    | 66.0    | 84.1     | 136.8  | 105.6    | 693.6   | 591.6   | 854.1   | 13.2    | 32.6    | 152.6   |
| Bbr_0203 |       | 151.0   | 141.0   | 138.8   | 138.8   | 170.1    | 136.3  | 136.3    | 170.1   | 136.3   | 34.7    | 34.7    | 39.4    | 828.8   |
| Bbr_0204 |       | 80.9    | 91.6    | 75.2    | 99.9    | 56.3     | 88.2   | 86.6     | 190.8   | 4335.7  | 2007.0  | 43.5    | 32.2    | 779.7   |
| Bbr_0205 |       | 402.0   | 433.4   | 311.6   | 635.9   | 255.0    | 2948.3 | 279.5    | 6551.6  | 12349.1 | 4939.6  | 235.3   | 171.1   | 2305.4  |
| Bbr_0208 |       | 2040.5  | 1672.5  | 1836.6  | 1448.9  | 1173.5   | 5999.2 | 1130.7   | 10600.2 | 3972.6  | 3024.6  | 2741.3  | 1154.7  | 2149.2  |
| Bbr_0209 |       | 1202.6  | 1102.0  | 850.5   | 1107.3  | 893.5    | 4355.2 | 887.5    | 6571.3  | 1122.0  | 1824.3  | 453.8   | 379.6   | 901.6   |
| Bbr_0210 |       | 67.4    | 74.6    | 58.5    | 57.0    | 70.7     | 67.3   | 89.0     | 385.7   | 607.6   | 351.7   | 54.0    | 54.1    | 157.9   |
| Bbr_0211 |       | 19.0    | 28.2    | 15.5    | 30.9    | 24.2     | 34.8   | 35.5     | 137.9   | 515.9   | 223.7   | 13.7    | 18.3    | 104.0   |
| Bbr_0212 |       | 356.5   | 165.4   | 304.8   | 142.1   | 348.6    | 348.6  | 348.6    | 314.2   | 2202.0  | 7117.6  | 467.5   | 1232.3  | 699.0   |
| Bbr_0213 |       | 8282.4  | 5202.7  | 7314.6  | 2156.1  | 5368.5   | 1013.9 | 6199.0   | 481.2   | 3872.6  | 1331.0  | 2868.8  | 765.7   | 5640.7  |
| Bbr_0214 |       | 836.7   | 626.7   | 759.5   | 447.8   | 1259.8   | 210.0  | 1259.8   | 1728.1  | 1734.9  | 476.0   | 496.9   | 241.8   | 1007.7  |
| Bbr_0215 |       | 2715.4  | 2464.1  | 2425.8  | 3185.8  | 3082.0   | 2818.0 | 3465.0   | 1061.3  | 4548.4  | 5186.4  | 1820.6  | 1155.7  | 3009.5  |
| Bbr_0216 |       | 1622.7  | 1251.0  | 1466.3  | 1169.3  | 930.7    | 6204.0 | 930.7    | 3127.5  | 5749.7  | 5345.0  | 1118.0  | 2153.6  | 2009.5  |
| Bbr_0217 |       | 379.6   | 488.4   | 316.4   | 408.4   | 200.1    | 111.7  | 255.0    | 165.2   | 1768.7  | 696.5   | 493.1   | 221.4   | 568.8   |
| Bbr_0218 |       | 79.9    | 71.4    | 61.9    | 59.9    | 88.7     | 187.9  | 113.5    | 374.6   | 1667.4  | 1180.3  | 57.9    | 283.6   | 344.9   |
| Bbr_0219 | tnpY  | 289.4   | 241.6   | 212.8   | 237.3   | 322.0    | 539.3  | 357.9    | 1468.2  | 1989.2  | 2609.1  | 346.1   | 415.7   | 586.0   |
| Bbr_0220 |       | 1011.8  | 1442.2  | 807.3   | 1035.3  | 475.7    | 792.5  | 534.9    | 454.8   | 2349.6  | 2374.3  | 587.5   | 3096.8  | 961.1   |
| Bbr_0221 |       | 603.5   | 396.4   | 491.0   | 180.0   | 331.0    | 95.7   | 272.9    | 262.8   | 3127.7  | 2809.3  | 4443.0  | 2727.3  | 1544.9  |
| Bbr_0222 |       | 1631.4  | 1259.2  | 1434.4  | 731.4   | 1152.9   | 431.4  | 1325.5   | 1025.9  | 7093.6  | 5626.7  | 19117.8 | 6609.6  | 5292.6  |
| Bbr_0223 |       | 813.1   | 929.5   | 704.2   | 860.4   | 631.3    | 264.6  | 820.5    | 806.4   | 1726.0  | 1892.9  | 1155.4  | 1202.7  | 1107.5  |
| Bbr_0224 |       | 720.7   | 855.1   | 611.2   | 668.6   | 1244.6   | 415.3  | 1384.9   | 2302.3  | 1908.3  | 1802.4  | 2323.7  | 1007.6  | 1365.6  |
| Bbr_0225 |       | 785.3   | 991.0   | 631.2   | 648.6   | 648.6    | 154.9  | 814.0    | 201.8   | 1319.9  | 1026.5  | 1522.9  | 736.6   | 953.6   |
| Bbr_0226 | amtY  | 1337.5  | 1616.3  | 1217.5  | 1390.8  | 1263.7   | 412.2  | 1147.9   | 680.8   | 1579.9  | 1551.5  | 2811.0  | 2071.5  | 1562.9  |
| Bbr_0227 |       | 1089.1  | 1219.5  | 923.8   | 1025.1  | 404.8    | 429.8  | 543.7    | 311.4   | 1706.1  | 1726.1  | 2184.1  | 1626.5  | 1158.8  |
| Bbr_0228 |       | 194.6   | 224.7   | 132.8   | 205.4   | 121.7    | 126.3  | 175.2    | 363.8   | 1398.2  | 1260.4  | 188.4   | 207.5   | 368.5   |
| Bbr_0229 |       | 1015.6  | 908.2   | 821.7   | 1017.7  | 926.0    | 1173.1 | 975.2    | 2843.7  | 819.7   | 1687.7  | 478.6   | 340.5   | 839.5   |
| Bbr_0230 |       | 215.1   | 337.8   | 164.8   | 420.2   | 109.3    | 95.8   | 142.1    | 114.1   | 1877.5  | 1783.7  | 201.4   | 256.5   | 451.7   |
| Bbr_0231 |       | 2402.1  | 1607.5  | 1932.6  | 720.4   | 1585.6   | 348.2  | 1843.3   | 554.6   | 3722.0  | 3041.4  | 1608.0  | 6264.1  | 2182.2  |
| Bbr_0232 | gnt   | 11767.6 | 9996.3  | 11630.6 | 10151.8 | 8537.5   | 5962.3 | 7783.3   | 6214.0  | 8140.8  | 9952.3  | 8132.1  | 6259.6  | 9332.0  |
| Bbr_0233 | pgl   | 938.2   | 766.0   | 848.7   | 836.4   | 600.6    | 114.2  | 888.6    | 187.0   | 2227.0  | 6108.0  | 1003.8  | 561.3   | 1081.1  |
| Bbr_0234 |       | 2840.4  | 2879.3  | 2849.1  | 274.4   | 2337.2   | 2491.4 | 2397.1   | 271.4   | 3289.1  | 1822.8  | 834.8   | 1925.6  | 2530.2  |
| Bbr_0236 | zwf   | 5615.7  | 5628.6  | 5104.9  | 6209.8  | 3297.4   | 1488.6 | 3151.2   | 1498.7  | 4323.8  | 18649.1 | 2713.1  | 1429.5  | 4034.3  |
| Bbr_0236 |       | 289.7   | 288.3   | 239.9   | 263.5   | 184.9    | 54.4   | 251.6    | 111.1   | 855.9   | 1307.0  | 290.4   | 160.2   | 352.1   |
| Bbr_0237 | pepDB | 2062.9  | 2321.4  | 1673.5  | 1809.7  | 2178.4   | 590.5  | 2111.9   | 842.8   | 3630.3  | 2000.6  | 2264.7  | 6324.0  | 2320.3  |
| Bbr_0238 |       | 5737.9  | 9557.4  | 2265.8  | 1426.9  | 1311.8   | 565.7  | 1317.2   | 543.3   | 3935.9  | 2503.7  | 3576.3  | 1654.6  | 3024.1  |
| Bbr_0239 |       | 1003.1  | 998.1   | 798.9   | 833.0   | 658.7    | 611.5  | 857.9    | 1077.9  | 2030.4  | 3207.0  | 900.6   | 534.7   | 1041.6  |
| Bbr_0240 | ftsY  | 1072.9  | 1116.2  | 869.0   | 1071.7  | 908.5    | 862.5  | 1098.1   | 1729.2  | 1230.9  | 2706.2  | 1019.5  | 665.9   | 1034.2  |
| Bbr_0241 |       | 932.4   | 932.4   | 932.4   | 932.4   | 932.4    | 932.4  | 932.4    | 932.4   | 932.4   | 932.4   | 932.4   | 932.4   | 932.4   |
| Bbr_0242 | glnB  | 1450.4  | 1450.4  | 1270.5  | 1209.4  | 1389.3   | 1492.9 | 1478.3   | 2148.2  | 1765.8  | 1571.1  | 2020.4  | 2297.5  | 1562.4  |
| Bbr_0243 | glnD  | 96.1    | 105.0   | 70.0    | 54.8    | 64.8     | 30.2   | 94.5     | 518.0   | 612.4   | 347.2   | 65.5    | 92.5    | 167.2   |
| Bbr_0244 |       | 341.2   | 474.5   | 311.2   | 421.1   | 237.9    | 120.0  | 344.9    | 399.2   | 656.6   | 336.7   | 149.2   | 328.4   | 370.0   |
| Bbr_0245 | dnaB  | 946.8   | 1210.7  | 874.1   | 1098.2  | 536.5    | 271.2  | 711.8    | 166.9   | 1808.7  | 1844.3  | 1377.4  | 1413.7  | 1042.5  |
| Bbr_0246 | murE  | 955.8   | 1123.9  | 876.9   | 1036.7  | 557.5    | 247.3  | 640.7    | 1366.3  | 1006.0  | 1337.7  | 1102.5  | 654.0   | 856.6   |
| Bbr_0247 |       | 844.5   | 950.4   | 686.6   | 749.9   | 498.8    | 454.2  | 572.3    | 1426.8  | 1610.9  | 1312.2  | 1124.9  | 1012.0  | 889.7   |
| Bbr_0248 |       | 9579.3  | 5759.3  | 9849.7  | 3164.8  | 6288.8   | 9849.7 | 3164.8   | 33653.8 | 20462.4 | 9502.6  | 18926.7 | 7182.0  | 11421.6 |
| Bbr_0249 |       | 1591.8  | 1046.9  | 1378.7  | 716.5   | 1106.4   | 274.7  | 1347.1   | 521.7   | 4731.1  | 2068.   |         |         |         |

|          |       |         |         |         |         |         |         |         |          |         |         |         |         |         |
|----------|-------|---------|---------|---------|---------|---------|---------|---------|----------|---------|---------|---------|---------|---------|
| Bbr_0252 |       | 1165.1  | 1234.3  | 934.8   | 1039.0  | 597.7   | 913.6   | 650.7   | 997.6    | 1084.5  | 1335.2  | 601.0   | 627.0   | 839.0   |
| Bbr_0254 | rpsF  | 30374.2 | 31058.6 | 33896.1 | 27624.6 | 25354.4 | 18636.7 | 20653.5 | 8782.6   | 33737.0 | 19788.1 | 43481.5 | 46414.7 | 31249.4 |
| Bbr_0255 | ssb   | 26817.4 | 28439.7 | 27963.3 | 24474.6 | 27757.7 | 17372.4 | 24820.7 | 6320.0   | 25697.8 | 16534.9 | 35931.0 | 38015.8 | 28164.6 |
| Bbr_0256 | rpsR  | 18663.7 | 20158.8 | 18935.4 | 17228.4 | 14481.8 | 9849.9  | 11805.6 | 3964.4   | 18653.3 | 12315.4 | 31874.1 | 31635.4 | 19029.2 |
| Bbr_0257 | rplI  | 15584.5 | 16962.9 | 14973.8 | 13977.4 | 10471.0 | 8115.1  | 7970.9  | 2440.3   | 20368.2 | 13899.7 | 31369.4 | 32190.8 | 16789.6 |
| Bbr_0258 |       | 289.4   | 346.5   | 220.6   | 181.4   | 147.8   | 112.1   | 186.1   | 201.6    | 2637.6  | 815.0   | 170.0   | 340.0   | 323.8   |
| Bbr_0259 |       | 248.6   | 331.2   | 206.6   | 183.2   | 145.1   | 142.6   | 142.6   | 589.9    | 1019.0  | 860.2   | 365.5   | 385.5   | 323.8   |
| Bbr_0260 |       | 51.3    | 32.8    | 25.9    | 25.6    | 26.3    | 42.9    | 38.3    | 121.2    | 690.5   | 475.6   | 17.3    | 288.7   | 141.6   |
| Bbr_0261 |       | 386.3   | 292.5   | 291.4   | 237.1   | 266.2   | 339.4   | 333.5   | 971.5    | 1655.4  | 1784.1  | 360.9   | 1029.5  | 549.0   |
| Bbr_0262 |       | 1032.5  | 940.3   | 874.7   | 722.2   | 674.4   | 262.8   | 933.4   | 627.0    | 1889.9  | 966.2   | 431.9   | 235.9   | 972.8   |
| Bbr_0263 |       | 14404.3 | 11590.9 | 11812.7 | 7514.4  | 13185.3 | 6550.3  | 11415.4 | 6179.5   | 9781.4  | 13158.6 | 9335.8  | 3096.9  | 11655.8 |
| Bbr_0264 |       | 6187.1  | 6187.7  | 6245.2  | 5435.0  | 6471.2  | 16214.9 | 5788.3  | 92732.7  | 6593.3  | 8998.1  | 6146.7  | 47553.1 | 6158.3  |
| Bbr_0265 |       | 4167.9  | 4004.8  | 3819.2  | 4256.1  | 3755.4  | 9023.6  | 4708.2  | 55847.9  | 4721.0  | 6323.4  | 4617.1  | 43682.4 | 4298.0  |
| Bbr_0266 |       | 79.3    | 42.5    | 64.6    | 35.8    | 54.2    | 56.3    | 60.0    | 178.4    | 1219.3  | 996.3   | 12.2    | 8.1     | 248.3   |
| Bbr_0267 | glpF  | 621.8   | 569.8   | 508.4   | 356.9   | 357.4   | 214.7   | 432.6   | 287.0    | 2260.3  | 704.9   | 2649.8  | 1889.0  | 1138.4  |
| Bbr_0268 | slpP  | 1575.7  | 1949.2  | 1129.0  | 1446.2  | 969.4   | 626.8   | 1141.9  | 394.6    | 2380.9  | 2095.7  | 1186.0  | 459.0   | 1397.1  |
| Bbr_0269 |       | 500.5   | 439.0   | 392.8   | 342.1   | 288.5   | 1488.4  | 357.0   | 7080.6   | 1196.7  | 980.7   | 271.8   | 206.1   | 501.2   |
| Bbr_0270 |       | 443.2   | 348.8   | 449.9   | 232.1   | 223.0   | 223.0   | 286.7   | 252.9    | 972.8   | 583.2   | 356.8   | 239.4   | 440.1   |
| Bbr_0271 | pyrE1 | 2214.2  | 2412.1  | 1819.0  | 2157.3  | 1131.1  | 1099.0  | 1113.3  | 487.6    | 3377.2  | 2567.4  | 1676.7  | 591.4   | 1888.6  |
| Bbr_0272 |       | 798.8   | 804.8   | 709.8   | 717.5   | 396.1   | 615.2   | 436.9   | 1468.5   | 1584.4  | 978.8   | 664.5   | 415.9   | 765.1   |
| Bbr_0273 |       | 1813.3  | 1695.1  | 1773.1  | 1406.2  | 1841.7  | 277.0   | 1852.0  | 854.1    | 930.9   | 2033.0  | 363.9   | 589.7   | 1445.9  |
| Bbr_0274 |       | 2197.3  | 1859.8  | 1869.1  | 1271.9  | 1713.4  | 264.7   | 2344.8  | 1689.3   | 1118.4  | 386.8   | 286.7   | 351.5   | 1588.3  |
| Bbr_0275 |       | 49.1    | 40.9    | 36.4    | 31.2    | 58.8    | 33.7    | 66.7    | 275.8    | 1289.0  | 374.6   | 21.3    | 21.3    | 253.6   |
| Bbr_0276 | gatC  | 484.8   | 669.7   | 306.8   | 557.3   | 160.9   | 189.8   | 238.0   | 218.0    | 1238.4  | 1644.2  | 606.7   | 239.2   | 505.9   |
| Bbr_0277 | gatA  | 5117.8  | 6698.4  | 4851.9  | 6657.8  | 4128.2  | 843.1   | 4949.9  | 1380.1   | 4399.4  | 5120.3  | 7433.3  | 6175.4  | 5146.7  |
| Bbr_0278 | gatB  | 3923.0  | 4447.3  | 3587.7  | 3803.2  | 712.8   | 1897.8  | 671.7   | 4206.9   | 5503.0  | 5532.5  | 3674.4  | 3473.3  | 3473.3  |
| Bbr_0279 |       | 2273.1  | 1868.6  | 2028.5  | 2017.4  | 1897.3  | 3012.6  | 2017.6  | 2575.7   | 3971.7  | 4446.7  | 1408.4  | 1715.3  | 2266.1  |
| Bbr_0280 |       | 2207.1  | 2207.0  | 1903.1  | 1596.2  | 1903.1  | 1596.2  | 1903.1  | 2234.1   | 23789.7 | 1869.2  | 3781.7  | 1936.0  | 3781.7  |
| Bbr_0281 |       | 8794.3  | 8282.9  | 8035.5  | 7966.9  | 11099.6 | 5430.4  | 10918.5 | 3770.8   | 10726.4 | 7256.9  | 8403.6  | 7754.2  | 9663.0  |
| Bbr_0282 | rho   | 3257.9  | 3870.2  | 2771.7  | 4219.3  | 2252.9  | 3717.9  | 1960.6  | 5128.2   | 10986.5 | 4093.1  | 8895.5  | 3271.5  | 3271.5  |
| Bbr_0283 |       | 449.5   | 455.1   | 341.3   | 264.8   | 195.8   | 259.0   | 231.3   | 459.3    | 1126.0  | 1116.6  | 496.1   | 87.1    | 473.3   |
| Bbr_0284 | lacZ2 | 2534.4  | 2862.1  | 2340.8  | 1000.7  | 2058.0  | 2149.4  | 2382.7  | 868.0    | 1798.5  | 1029.2  | 1347.6  | 2244.0  | 2244.0  |
| Bbr_0285 | lacZ2 | 2383.7  | 2846.0  | 2308.7  | 802.5   | 2306.7  | 1720.3  | 1145.5  | 1720.3   | 1145.5  | 565.8   | 1606.1  | 1159.7  | 1866.2  |
| Bbr_0287 | tyrA1 | 3189.1  | 3130.5  | 2993.0  | 2304.8  | 3170.4  | 1526.2  | 3404.8  | 3717.7   | 3227.9  | 2272.3  | 2218.9  | 1373.2  | 3034.0  |
| Bbr_0288 |       | 404.7   | 423.3   | 186.2   | 186.2   | 252.6   | 186.2   | 252.6   | 365.9    | 1749.9  | 1749.9  | 481.5   | 481.5   | 481.5   |
| Bbr_0289 | valS  | 2985.9  | 3515.4  | 2610.6  | 3574.3  | 1907.8  | 4274.6  | 1831.4  | 7834.5   | 2150.7  | 4211.3  | 3020.6  | 2181.5  | 2417.8  |
| Bbr_0290 |       | 308.6   | 329.5   | 263.7   | 310.6   | 245.8   | 308.3   | 301.3   | 485.7    | 861.8   | 537.7   | 325.0   | 1205.1  | 384.4   |
| Bbr_0291 | nth   | 783.5   | 758.0   | 711.7   | 870.9   | 717.2   | 1172.0  | 721.2   | 528.0    | 2688.3  | 1714.8  | 1119.0  | 5040.9  | 1123.5  |
| Bbr_0292 | glnR  | 3498.2  | 2939.6  | 3022.6  | 2738.9  | 5008.0  | 4053.7  | 4414.7  | 7777.5   | 5772.6  | 5391.0  | 7111.7  | 2569.8  | 4047.6  |
| Bbr_0293 |       | 5424.4  | 3819.7  | 5712.7  | 3794.7  | 8100.6  | 3184.3  | 7072.3  | 6815.5   | 2692.2  | 2852.3  | 2554.5  | 3691.6  | 5259.4  |
| Bbr_0294 |       | 4031.9  | 2572.4  | 3053.7  | 1941.3  | 2965.8  | 2781.2  | 2686.1  | 1265.2   | 2369.0  | 1661.7  | 1448.0  | 2044.1  | 2759.1  |
| Bbr_0295 | ppa   | 17217.1 | 14357.9 | 18549.5 | 10493.0 | 10406.5 | 10493.0 | 9200.0  | 1985.2   | 11050.4 | 9438.3  | 13959.9 | 4596.5  | 13069.2 |
| Bbr_0296 |       | 2146.6  | 2136.8  | 1996.8  | 1463.4  | 1493.6  | 1473.8  | 1938.2  | 388.2    | 2303.2  | 1771.8  | 1983.7  | 1015.1  | 1974.1  |
| Bbr_0297 |       | 32.7    | 26.9    | 25.9    | 34.2    | 18.3    | 37.8    | 159.5   | 409.2    | 409.2   | 241.7   | 10.3    | 32.1    | 91.7    |
| Bbr_0299 |       | 57.6    | 81.4    | 39.6    | 144.1   | 148.1   | 2958.0  | 74.8    | 1696.9   | 417.6   | 744.8   | 18.8    | 185.0   | 126.1   |
| Bbr_0300 |       | 32.5    | 28.9    | 21.4    | 31.1    | 11.0    | 22.7    | 24.6    | 29.5     | 443.2   | 813.7   | 10.0    | 6.6     | 90.4    |
| Bbr_0302 |       | 1875.8  | 1425.2  | 1260.1  | 1153.4  | 3208.5  | 1603.5  | 2695.4  | 21652.7  | 2087.3  | 1032.4  | 1640.8  | 1501.9  | 2128.0  |
| Bbr_0303 |       | 821.3   | 462.7   | 752.6   | 292.6   | 434.2   | 1021.1  | 472.0   | 668.5    | 1765.9  | 865.3   | 493.3   | 300.8   | 789.9   |
| Bbr_0304 |       | 813.8   | 445.3   | 701.5   | 213.2   | 477.5   | 373.2   | 617.5   | 172.1    | 1298.7  | 359.8   | 386.5   | 140.0   | 715.9   |
| Bbr_0305 |       | 821.6   | 322.5   | 767.6   | 135.4   | 912.1   | 92.8    | 823.2   | 218.9    | 1009.5  | 984.2   | 337.5   | 337.5   | 886.4   |
| Bbr_0306 |       | 732.2   | 302.5   | 629.0   | 189.9   | 618.7   | 234.5   | 664.5   | 664.5    | 1354.9  | 322.0   | 556.9   | 281.7   | 789.5   |
| Bbr_0307 |       | 821.8   | 574.6   | 709.5   | 544.4   | 430.3   | 704.6   | 517.0   | 653.4    | 2039.9  | 1144.0  | 661.9   | 319.2   | 863.4   |
| Bbr_0308 |       | 1160.8  | 869.8   | 1096.3  | 769.2   | 880.9   | 645.6   | 979.8   | 861.5    | 2234.2  | 1137.7  | 1036.3  | 627.8   | 1231.4  |
| Bbr_0310 | lacZ3 | 114.9   | 104.7   | 56.6    | 51.1    | 146.7   | 199.5   | 154.3   | 401.2    | 785.2   | 288.4   | 56.0    | 28.1    | 218.9   |
| Bbr_0311 |       | 100.9   | 84.5    | 76.1    | 66.2    | 156.8   | 156.8   | 85.8    | 490.3    | 557.1   | 468.3   | 34.1    | 56.2    | 152.6   |
| Bbr_0312 |       | 97.8    | 66.6    | 78.5    | 52.6    | 96.1    | 107.2   | 136.8   | 447.7    | 1091.0  | 682.3   | 36.8    | 287.5   | 256.5   |
| Bbr_0313 |       | 55.4    | 55.8    | 41.2    | 47.8    | 56.5    | 207.4   | 74.9    | 988.8    | 519.2   | 4410.0  | 18.8    | 16.7    | 127.7   |
| Bbr_0315 |       | 15.6    | 21.6    | 14.6    | 11.6    | 29.7    | 9.4     | 17.1    | 25.7     | 461.8   | 244.0   | 9.5     | 5.5     | 88.4    |
| Bbr_0316 |       | 79.0    | 67.3    | 66.0    | 54.7    | 86.5    | 131.1   | 81.5    | 168.9    | 644.7   | 485.9   | 33.5    | 18.7    | 165.2   |
| Bbr_0317 |       | 136.5   | 111.5   | 92.6    | 102.4   | 92.6    | 137.6   | 155.2   | 396.9    | 1035.5  | 625.7   | 41.3    | 34.5    | 263.4   |
| Bbr_0318 |       | 148.0   | 155.2   | 140.6   | 176.7   | 155.2   | 311.5   | 142.6   | 236.6    | 515.7   | 838.4   | 49.2    | 28.4    | 191.9   |
| Bbr_0319 |       | 1782.1  | 1959.7  | 1663.5  | 3326.4  | 18392.8 | 2311.9  | 99287.8 | 2819.3   | 5211.1  | 2328.0  | 36827.9 | 2094.5  | 2094.5  |
| Bbr_0320 |       | 4710.9  | 4903.7  | 3882.3  | 6273.5  | 3527.9  | 36848.4 | 2973.9  | 173792.9 | 5216.8  | 6295.7  | 6628.3  | 74243.3 | 4490.2  |
| Bbr_0321 |       | 115.4   | 101.4   | 107.8   | 98.9    | 195.5   | 126.6   | 126.6   | 95.0     | 560.2   | 7893.0  | 96.1    | 230.7   | 233.6   |
| Bbr_0322 | metA  | 544.6   | 675.1   | 451.0   | 291.3   | 764.7   | 434.4   | 360.3   | 275.0    | 1183.4  | 1086.1  | 616.9   | 1474.4  | 574.6   |
| Bbr_0323 | atpB  | 9555.3  | 13413.2 | 9243.6  | 16683.1 | 7747.3  | 16574.7 | 6787.4  | 5758.7   | 12495.9 | 5378.0  | 6315.0  | 10117.9 | 8690.7  |
| Bbr_0324 | atpE  | 36265.9 | 46383.6 | 42623.7 | 43500.2 | 33682.5 | 18654.4 | 26036.2 | 5341.4   | 26233.5 | 9345.1  | 29830.1 | 25744.6 | 32445.3 |
| Bbr_0325 | atpF  | 36292.8 | 45614.0 | 46139.7 | 45932.5 | 32878.2 | 20630.2 | 26792.9 | 6043.6   | 32073.9 | 11665.7 | 36060.4 | 32006.6 | 35039.6 |
| Bbr_0326 | atpH  | 33185.1 | 41371.3 | 39960.7 | 41370.3 | 42075.2 | 21951.5 | 23901.6 | 10170.3  | 21997.1 | 8296.6  | 33341.3 | 32460.7 | 30651.2 |
| Bbr_0327 | atpA  | 36117.8 | 47014.8 | 46978.8 | 51095.5 | 36848.9 | 21496.7 | 36231.7 | 11408.3  | 31443.7 | 9918.7  | 36991.6 | 35968.7 | 37752.1 |
| Bbr_0328 | atpG  | 27453.8 | 35374.4 | 32329.8 | 39225.5 | 39225.5 | 22620.1 | 14063.4 | 4454.2   | 20673.6 | 7898.1  | 27382.6 | 24336.2 | 24336.2 |
| Bbr_0329 | atpD  | 22437.3 | 28428.4 | 23266.6 | 30439.4 | 16294.2 | 10634.3 | 12125.0 | 3977.1   | 19286.5 | 7994.3  | 31962.2 | 20895.3 | 20895.3 |
| Bbr_0330 | atpC  | 8161.7  | 12173.9 | 8604.9  | 15604.9 | 6686.8  | 4983.3  | 6554.0  | 3684.4   | 8306.5  | 4152.3  | 11933.9 | 11781.7 | 8374.6  |
| Bbr_0331 |       | 872.7   | 1019.6  | 683.4   | 975.1   | 580.8   | 702.7   | 606.0   | 334.6    | 2094.5  | 1349.4  | 1646.5  | 932.2   | 932.2   |
| Bbr_0332 | fkpP1 | 7695.3  | 5835.1  | 1440.6  | 1327.9  | 726.2   | 310.9   | 826.7   | 265.3    | 2803.8  | 3176.9  | 1981.7  | 1406.0  | 2579.0  |
| Bbr_0333 |       | 2167.0  | 1888.0  | 2120.2  | 1195.1  | 1390.9  | 1165.6  | 1165.6  | 384.3    | 2684.1  | 4452.6  | 2127.9  | 3878.7  | 1871.3  |
| Bbr_0334 |       | 2505.1  | 2425.6  | 2105.6  | 2677.0  | 1271.8  | 1098.1  | 1333.4  | 472.1    | 4129.8  | 5567.0  | 2629.0  | 3959.4  | 2329.1  |
| Bbr_0335 |       | 5510.2  | 5635.2  | 5635.2  | 6526.7  | 3594.7  | 7319.0  | 2739    |          |         |         |         |         |         |

|          |       |         |         |         |         |         |         |         |         |         |         |         |         |         |
|----------|-------|---------|---------|---------|---------|---------|---------|---------|---------|---------|---------|---------|---------|---------|
| Bbr_0337 |       | 151.3   | 143.9   | 167.0   | 213.2   | 141.7   | 421.5   | 192.3   | 810.0   | 678.4   | 790.3   | 42.3    | 118.2   | 228.8   |
| Bbr_0338 | psp1  | 1367.1  | 1150.8  | 1080.8  | 460.1   | 937.3   | 334.5   | 1107.9  | 684.8   | 724.7   | 702.3   | 683.8   | 258.2   | 983.6   |
| Bbr_0339 | plsC1 | 2657.2  | 2978.3  | 2273.8  | 2099.0  | 1640.8  | 647.4   | 1926.7  | 2352.7  | 1851.8  | 1394.8  | 1391.9  | 398.4   | 1957.0  |
| Bbr_0340 | gpsA  | 1371.7  | 1311.0  | 1097.1  | 804.5   | 887.8   | 924.9   | 887.8   | 296.3   | 1397.1  | 1441.3  | 1313.9  | 449.1   | 1145.4  |
| Bbr_0341 | ddlA  | 1864.6  | 1959.9  | 1516.5  | 1371.8  | 1171.5  | 493.8   | 1397.8  | 1148.3  | 1752.7  | 1669.4  | 1660.1  | 1006.1  | 1560.6  |
| Bbr_0342 |       | 131.7   | 147.9   | 91.4    | 108.2   | 61.0    | 144.4   | 94.7    | 163.7   | 666.8   | 467.2   | 121.0   | 217.3   | 197.9   |
| Bbr_0343 |       | 48.0    | 57.4    | 45.6    | 53.8    | 85.1    | 23.7    | 75.4    | 107.8   | 905.4   | 252.1   | 27.8    | 53.7    | 197.9   |
| Bbr_0344 |       | 56.1    | 60.9    | 45.0    | 49.6    | 43.6    | 51.2    | 64.0    | 66.2    | 330.7   | 286.2   | 21.4    | 25.9    | 93.5    |
| Bbr_0345 |       | 60.9    | 60.3    | 41.6    | 36.3    | 54.8    | 25.5    | 75.1    | 81.7    | 317.2   | 270.1   | 16.6    | 15.6    | 94.3    |
| Bbr_0346 |       | 280.1   | 248.6   | 225.5   | 180.3   | 212.5   | 273.8   | 279.8   | 662.8   | 1039.3  | 846.2   | 196.5   | 199.6   | 372.3   |
| Bbr_0347 |       | 2375.5  | 1486.3  | 2182.0  | 1344.7  | 3421.1  | 1239.3  | 2224.7  | 4388.5  | 2584.4  | 3238.8  | 955.6   | 428.6   | 2290.6  |
| Bbr_0348 | ansB  | 2424.2  | 2865.6  | 2110.3  | 2945.8  | 2164.3  | 944.1   | 2738.8  | 1477.8  | 3256.7  | 4364.8  | 1656.3  | 594.5   | 2391.8  |
| Bbr_0349 |       | 296.1   | 209.0   | 259.3   | 72.4    | 403.9   | 31.1    | 334.9   | 252.4   | 411.1   | 598.2   | 189.3   | 79.1    | 316.1   |
| Bbr_0350 |       | 756.1   | 632.9   | 584.8   | 280.6   | 375.6   | 168.2   | 423.8   | 463.4   | 1845.5  | 1140.2  | 703.3   | 257.6   | 781.5   |
| Bbr_0351 |       | 1424.3  | 1118.2  | 1339.1  | 585.0   | 771.3   | 239.7   | 934.8   | 290.0   | 1697.9  | 1682.2  | 1437.5  | 423.4   | 1267.5  |
| Bbr_0352 |       | 190.0   | 211.5   | 146.1   | 121.8   | 464.7   | 160.5   | 1164.7  | 207.4   | 2077.4  | 554.1   | 111.3   | 128.4   | 467.9   |
| Bbr_0353 |       | 99.1    | 109.4   | 81.7    | 47.5    | 116.6   | 69.4    | 166.2   | 210.1   | 769.0   | 206.9   | 94.9    | 40.5    | 221.3   |
| Bbr_0354 |       | 237.6   | 210.6   | 225.2   | 144.9   | 260.8   | 73.5    | 407.1   | 185.3   | 1436.6  | 416.3   | 306.8   | 107.9   | 479.0   |
| Bbr_0355 |       | 85.6    | 88.8    | 71.8    | 49.8    | 61.7    | 62.3    | 79.2    | 1189.4  | 383.6   | 47.0    | 75.3    | 255.8   |         |
| Bbr_0356 |       | 299.9   | 286.3   | 269.0   | 303.1   | 287.0   | 280.3   | 353.1   | 781.2   | 1266.3  | 1195.0  | 300.4   | 972.7   | 462.6   |
| Bbr_0358 |       | 809.5   | 720.0   | 719.8   | 871.4   | 694.3   | 1117.1  | 864.1   | 389.1   | 2407.4  | 5909.3  | 399.3   | 435.5   | 982.4   |
| Bbr_0359 | ogt   | 449.2   | 488.7   | 409.7   | 368.1   | 252.4   | 282.1   | 301.4   | 892.9   | 666.6   | 871.9   | 344.1   | 224.8   | 403.9   |
| Bbr_0360 |       | 382.6   | 328.3   | 306.5   | 297.3   | 262.3   | 297.2   | 314.8   | 811.1   | 924.9   | 852.1   | 210.1   | 269.4   | 400.2   |
| Bbr_0361 |       | 28.4    | 20.4    | 18.3    | 22.3    | 32.0    | 44.1    | 42.8    | 181.1   | 1072.6  | 278.5   | 9.4     | 65.2    | 200.6   |
| Bbr_0362 |       | 62.0    | 90.6    | 72.7    | 142.6   | 64.1    | 257.4   | 87.9    | 498.9   | 1019.3  | 698.0   | 62.9    | 67.0    | 228.1   |
| Bbr_0363 |       | 1437.3  | 1254.3  | 1215.7  | 994.9   | 976.4   | 955.6   | 1160.0  | 2035.4  | 2600.8  | 2138.0  | 762.9   | 4029.7  | 1358.9  |
| Bbr_0364 |       | 372.2   | 289.2   | 371.3   | 350.6   | 341.1   | 591.7   | 347.7   | 1695.0  | 708.3   | 376.6   | 348.6   | 1449.1  | 415.0   |
| Bbr_0365 |       | 325.2   | 115.3   | 315.1   | 293.8   | 171.3   | 315.1   | 187.7   | 36.7    | 1187.7  | 1477.4  | 1037.4  | 429.3   | 429.3   |
| Bbr_0366 |       | 1484.5  | 648.9   | 1281.4  | 323.8   | 709.5   | 563.2   | 752.3   | 985.3   | 1295.8  | 1252.0  | 5334.5  | 2877.9  | 1809.7  |
| Bbr_0367 |       | 147.7   | 103.3   | 121.3   | 73.6    | 130.8   | 130.8   | 173.5   | 536.7   | 1055.6  | 920.9   | 283.7   | 489.8   | 353.6   |
| Bbr_0368 |       | 676.1   | 279.4   | 598.3   | 86.8    | 945.3   | 178.7   | 1032.6  | 1143.3  | 1054.5  | 430.6   | 713.6   | 683.5   | 836.7   |
| Bbr_0369 |       | 1488.6  | 1541.3  | 1227.7  | 1462.9  | 869.0   | 1321.6  | 617.0   | 617.0   | 1380.7  | 2072.5  | 995.2   | 637.9   | 1135.3  |
| Bbr_0370 | rpsO  | 15198.6 | 11921.2 | 14339.9 | 12288.7 | 17059.7 | 20911.6 | 15406.9 | 36685.5 | 12558.3 | 11882.7 | 10355.8 | 10810.1 | 14153.2 |
| Bbr_0371 | pnp   | 437.8   | 2817.6  | 3841.3  | 2595.5  | 2492.9  | 1936.2  | 2292.2  | 664.2   | 7817.6  | 11097.6 | 7627.7  | 7972.6  | 4741.4  |
| Bbr_0372 |       | 34.8    | 36.0    | 24.1    | 35.0    | 24.1    | 45.5    | 35.0    | 32.7    | 589.2   | 90.1    | 10.1    | 7.3     | 119.9   |
| Bbr_0373 |       | 43.3    | 51.3    | 34.8    | 47.4    | 47.7    | 59.7    | 69.8    | 452.3   | 611.6   | 545.2   | 9.9     | 9.7     | 136.2   |
| Bbr_0374 | lemA  | 1583.7  | 1223.8  | 1318.9  | 454.3   | 1359.2  | 161.2   | 1742.7  | 617.7   | 1029.3  | 631.5   | 1701.3  | 289.3   | 1455.9  |
| Bbr_0375 |       | 387.8   | 242.8   | 322.4   | 80.2    | 238.2   | 81.0    | 295.3   | 192.8   | 589.4   | 273.2   | 433.4   | 212.0   | 377.8   |
| Bbr_0376 |       | 29.6    | 25.2    | 14.6    | 22.9    | 25.7    | 45.6    | 35.4    | 297.3   | 546.7   | 349.9   | 21.7    | 93.3    | 112.3   |
| Bbr_0377 |       | 3315.4  | 3525.7  | 3039.5  | 2371.6  | 1809.4  | 1755.1  | 1060.6  | 1476.0  | 4607.8  | 5481.8  | 3149.6  | 1408.3  | 2946.1  |
| Bbr_0378 | iumH1 | 730.9   | 731.5   | 661.4   | 514.2   | 594.8   | 260.6   | 627.9   | 252.4   | 1274.6  | 2054.4  | 1079.2  | 504.7   | 828.1   |
| Bbr_0379 | rimM  | 2452.5  | 2747.4  | 2216.2  | 2939.8  | 1524.9  | 4228.9  | 1291.5  | 1165.1  | 3114.0  | 2185.4  | 2667.0  | 3641.1  | 2356.2  |
| Bbr_0380 |       | 14940.6 | 14410.0 | 13931.9 | 13831.9 | 28176.1 | 8038.2  | 26444.4 | 9437.4  | 8099.3  | 11642.4 | 11108.7 | 5946.6  | 17116.4 |
| Bbr_0381 | rpsP  | 30459.2 | 26207.9 | 32942.2 | 31111.4 | 17144.3 | 28704.1 | 11928.1 | 32071.1 | 43330.0 | 40862.6 | 20283.3 | 32691.8 | 32691.8 |
| Bbr_0382 |       | 1459.2  | 1733.5  | 1365.6  | 2659.2  | 2457.6  | 1281.8  | 2140.1  | 1447.0  | 3803.5  | 2605.8  | 1529.8  | 2409.7  | 2126.0  |
| Bbr_0383 | ffh   | 1537.0  | 1847.5  | 1526.9  | 2961.2  | 1095.8  | 937.1   | 1960.4  | 502.8   | 1960.4  | 3439.7  | 1649.7  | 1682.6  | 1446.6  |
| Bbr_0384 |       | 168.1   | 138.3   | 145.6   | 154.1   | 108.1   | 334.1   | 140.9   | 448.5   | 1224.8  | 928.2   | 238.2   | 1789.7  | 337.6   |
| Bbr_0385 | cysS  | 1248.6  | 1487.3  | 1117.5  | 1446.0  | 611.1   | 364.7   | 641.9   | 231.4   | 1323.4  | 1649.2  | 1526.2  | 594.3   | 1078.1  |
| Bbr_0386 | guaA1 | 1892.2  | 2472.6  | 1828.9  | 2410.4  | 2587.3  | 1169.5  | 2441.1  | 3618.5  | 2532.0  | 2297.7  | 1554.5  | 843.8   | 2138.3  |
| Bbr_0387 |       | 916.0   | 969.0   | 801.2   | 973.8   | 672.3   | 177.7   | 818.0   | 577.3   | 1049.9  | 1631.7  | 796.1   | 371.8   | 842.2   |
| Bbr_0388 |       | 637.9   | 902.4   | 534.8   | 875.4   | 692.6   | 2229.9  | 644.0   | 1773.7  | 1444.5  | 1179.8  | 528.3   | 788.3   | 747.0   |
| Bbr_0389 |       | 982.1   | 1502.4  | 790.8   | 1441.1  | 498.9   | 3701.5  | 457.2   | 1932.6  | 1752.1  | 1465.8  | 657.0   | 966.2   | 856.4   |
| Bbr_0390 | ilvN  | 2455.1  | 2481.3  | 2062.4  | 2315.8  | 2773.6  | 1068.2  | 3002.6  | 1277.6  | 2788.5  | 2404.0  | 1779.3  | 1179.4  | 2476.9  |
| Bbr_0391 | ilvB  | 2911.3  | 3151.7  | 2935.1  | 3831.3  | 2786.3  | 1557.5  | 3054.4  | 1168.2  | 2207.9  | 2362.3  | 2061.6  | 1853.4  | 2659.4  |
| Bbr_0392 | mcS   | 1968.0  | 1720.5  | 1793.1  | 1515.8  | 999.6   | 2481.4  | 937.5   | 704.5   | 1748.5  | 1423.5  | 1480.4  | 2328.6  | 1487.8  |
| Bbr_0393 | rpmF  | 16326.6 | 15031.4 | 15179.5 | 17411.0 | 25738.5 | 37299.7 | 22107.6 | 93062.0 | 13598.0 | 12240.7 | 18375.0 | 9693.6  | 18553.0 |
| Bbr_0394 |       | 2728.4  | 2426.4  | 2368.0  | 1902.7  | 1676.5  | 625.1   | 1694.9  | 489.2   | 2274.3  | 1933.6  | 2275.4  | 1281.8  | 2169.9  |
| Bbr_0395 |       | 1724.1  | 1542.1  | 1650.2  | 1069.1  | 133.7   | 1649.3  | 324.3   | 324.3   | 1176.5  | 1541.5  | 1747.4  | 329.8   | 1718.1  |
| Bbr_0396 | coaD  | 2792.9  | 2688.7  | 2367.8  | 1711.5  | 1495.6  | 508.5   | 1604.8  | 1160.5  | 3291.9  | 2090.7  | 2013.6  | 362.8   | 2261.1  |
| Bbr_0397 |       | 4426.9  | 4348.0  | 3901.3  | 3993.9  | 4009.7  | 3919.7  | 3732.1  | 6999.2  | 2206.3  | 2759.4  | 2017.5  | 1663.2  | 3382.3  |
| Bbr_0398 |       | 966.8   | 1311.0  | 881.3   | 604.8   | 710.6   | 183.8   | 794.8   | 428.7   | 1234.0  | 934.2   | 518.3   | 389.5   | 851.0   |
| Bbr_0399 |       | 376.5   | 723.3   | 299.4   | 900.8   | 327.0   | 1676.6  | 416.5   | 1851.7  | 1417.3  | 1178.0  | 252.3   | 1116.1  | 514.8   |
| Bbr_0400 |       | 941.9   | 1066.8  | 839.6   | 894.5   | 505.3   | 281.8   | 628.5   | 430.8   | 1598.5  | 1013.7  | 719.5   | 283.9   | 872.2   |
| Bbr_0401 | pncB  | 1931.5  | 1811.9  | 1467.1  | 1989.6  | 1547.2  | 593.8   | 1336.1  | 1467.1  | 593.8   | 2047.7  | 2188.3  | 977.3   | 1635.7  |
| Bbr_0402 | rph   | 2980.6  | 2969.9  | 2581.0  | 2686.4  | 2089.5  | 1020.5  | 2536.0  | 816.3   | 2667.5  | 3367.2  | 2386.0  | 1821.6  | 2540.1  |
| Bbr_0403 |       | 2978.3  | 3093.5  | 2721.1  | 2756.5  | 2062.2  | 608.9   | 2435.6  | 702.8   | 2527.8  | 2835.7  | 2116.1  | 1773.6  | 2473.5  |
| Bbr_0404 |       | 167.5   | 200.0   | 147.8   | 186.2   | 105.4   | 162.1   | 131.5   | 246.9   | 575.5   | 584.1   | 204.0   | 402.0   | 221.9   |
| Bbr_0405 | gpi   | 22655.0 | 21945.8 | 23553.5 | 13185.8 | 38273.1 | 4673.6  | 42215.3 | 7651.5  | 14481.6 | 7395.2  | 20580.5 | 10008.4 | 26956.5 |
| Bbr_0406 |       | 919.4   | 1016.4  | 775.2   | 866.2   | 670.6   | 781.3   | 847.2   | 1407.5  | 982.4   | 1533.2  | 2972.9  | 363.5   | 763.0   |
| Bbr_0407 |       | 1100.9  | 1166.2  | 844.5   | 843.2   | 536.4   | 563.2   | 625.7   | 581.0   | 1361.2  | 1496.7  | 524.6   | 475.4   | 832.2   |
| Bbr_0408 | rpsI  | 11688.2 | 12054.8 | 11779.5 | 14895.4 | 19184.3 | 21132.0 | 1335.3  | 23407.8 | 25773.3 | 25773.3 | 14153.3 | 10223.9 | 14153.3 |
| Bbr_0409 | lepB  | 1551.3  | 1638.6  | 1265.0  | 1047.4  | 1283.2  | 833.2   | 1248.9  | 1248.9  | 2574.4  | 1988.4  | 1654.2  | 158.6   | 1658.6  |
| Bbr_0410 | mhB   | 446.3   | 456.5   | 379.4   | 355.7   | 364.2   | 112.8   | 416.2   | 188.0   | 1304.9  | 885.6   | 481.8   | 523.7   | 565.5   |
| Bbr_0411 |       | 784.7   | 692.6   | 698.8   | 479.7   | 636.2   | 325.3   | 585.7   | 768.9   | 1875.5  | 766.4   | 594.5   | 678.9   | 862.6   |
| Bbr_0413 | fadD1 | 1581.0  | 1742.2  | 1583.8  | 1525.6  | 999.7   | 994.1   | 1180.0  | 987.4   | 1397.7  | 2562.3  | 875.0   | 695.7   | 1269.5  |
| Bbr_0414 |       | 10.8    | 11.2    | 12.4    | 6.3     | 11.5    | 6.3     | 14.7    | 33.1    | 703.3   | 361.7   | 8.3     | 11.8    | 126.8   |
| Bbr_0415 |       | 76.7    | 96.6    | 57.7    | 57.7    | 57.7    | 48.2    | 65.7    | 149.1   | 516.9   | 472.5   | 88.0    | 93.3    | 143.1   |
| Bbr_0417 |       | 682.2   | 767.1   | 422.2   | 684.5   | 564.8   | 664.5   | 756.3   | 245.0   | 1848.0  | 1181.6  | 128.4   | 83.3    | 625.9   |
| Bbr_0418 |       | 4723.7  | 7323.1  | 4060.4  | 4860.1  | 3944.9  | 15151.3 | 3342.5  | 18487.5 | 2611.3  | 3430.6  | 1941.8  | 677.3   | 3437.4  |



|          |       |         |         |         |         |         |         |         |         |         |         |         |         |         |
|----------|-------|---------|---------|---------|---------|---------|---------|---------|---------|---------|---------|---------|---------|---------|
| Bbr_0505 |       | 646.4   | 924.9   | 555.7   | 711.0   | 603.4   | 147.1   | 670.3   | 602.0   | 1923.8  | 1521.5  | 532.5   | 337.8   | 822.0   |
| Bbr_0506 |       | 3188.6  | 3403.5  | 2920.4  | 3110.2  | 2554.4  | 4920.4  | 3255.3  | 31656.1 | 3587.7  | 4048.0  | 1965.1  | 1981.8  | 2911.9  |
| Bbr_0507 |       | 1492.6  | 1584.1  | 1227.5  | 1107.6  | 796.2   | 708.0   | 874.7   | 452.6   | 1334.4  | 1646.2  | 820.7   | 747.4   | 1091.0  |
| Bbr_0508 | dapB  | 2529.2  | 2871.3  | 2712.8  | 2547.9  | 1915.5  | 1209.5  | 1792.7  | 1809.3  | 2714.7  | 2313.7  | 1310.6  | 2465.9  | 2018.2  |
| Bbr_0509 | dapA2 | 11921.7 | 11574.2 | 9645.6  | 9817.0  | 10360.8 | 5714.4  | 9876.2  | 5599.2  | 8724.1  | 9054.7  | 7587.2  | 4645.1  | 9685.9  |
| Bbr_0510 |       | 3224.3  | 3724.1  | 2986.7  | 2986.7  | 3566.6  | 1854.9  | 408.1   | 318.5   | 3062.4  | 4532.1  | 3485.5  | 2579.8  | 2759.4  |
| Bbr_0511 | papN  | 3946.3  | 4470.8  | 3448.9  | 3465.2  | 2278.9  | 363.7   | 2650.2  | 671.8   | 4984.3  | 5943.4  | 4982.0  | 3960.3  | 3698.4  |
| Bbr_0512 | mrsA  | 7738.2  | 6977.0  | 7039.6  | 5375.0  | 6382.7  | 2296.4  | 6010.7  | 3150.8  | 5167.0  | 3669.9  | 5750.6  | 4060.2  | 6348.2  |
| Bbr_0513 |       | 3607.3  | 3151.2  | 2921.7  | 2141.8  | 1671.1  | 809.1   | 1614.5  | 466.6   | 2645.4  | 2255.1  | 3043.3  | 2289.7  | 2583.9  |
| Bbr_0514 |       | 1192.5  | 946.6   | 1092.1  | 855.8   | 1276.2  | 524.2   | 1201.7  | 1324.1  | 1857.2  | 1805.1  | 1335.0  | 1354.0  | 1325.8  |
| Bbr_0515 | prfB  | 1989.1  | 2068.6  | 1858.1  | 2588.0  | 1154.6  | 2145.5  | 1240.3  | 1240.3  | 4707.6  | 10857.9 | 2561.2  | 3995.7  | 2251.8  |
| Bbr_0516 | ftsE  | 2535.4  | 2801.1  | 2603.6  | 3629.6  | 2131.7  | 1080.6  | 2386.1  | 945.1   | 3653.4  | 8670.9  | 3014.2  | 3232.2  | 2720.7  |
| Bbr_0517 | ftsX  | 2094.4  | 2372.8  | 1924.8  | 2629.0  | 1003.8  | 732.4   | 1025.4  | 353.7   | 3596.6  | 7964.1  | 2812.4  | 2727.6  | 2076.2  |
| Bbr_0518 |       | 9297.1  | 6679.2  | 8744.8  | 5347.4  | 8948.9  | 2651.1  | 8619.3  | 2748.2  | 7155.4  | 13293.4 | 6118.3  | 13210.6 | 8147.3  |
| Bbr_0519 | smpB  | 1972.8  | 2353.7  | 1952.7  | 2632.6  | 1237.8  | 3953.6  | 1349.4  | 6501.9  | 2076.5  | 3388.6  | 1380.1  | 5147.3  | 1661.5  |
| Bbr_0520 |       | 256.0   | 377.0   | 238.7   | 306.8   | 399.9   | 465.8   | 438.2   | 709.1   | 735.4   | 1011.7  | 283.5   | 1015.8  | 391.9   |
| Bbr_0521 |       | 1246.8  | 1502.2  | 1077.1  | 1364.9  | 1666.3  | 3125.9  | 1605.2  | 4786.1  | 2789.6  | 2436.8  | 2469.4  | 5537.8  | 1809.1  |
| Bbr_0522 |       | 908.2   | 1144.6  | 930.2   | 1125.1  | 935.3   | 520.7   | 1313.5  | 709.2   | 904.1   | 1217.7  | 967.6   | 856.5   | 993.2   |
| Bbr_0523 |       | 1189.1  | 1438.3  | 1058.7  | 1200.8  | 1149.8  | 546.9   | 1405.7  | 1243.7  | 1070.1  | 1288.2  | 1119.2  | 986.8   | 1165.4  |
| Bbr_0524 | glmS  | 1809.6  | 1852.3  | 1667.5  | 1522.4  | 998.6   | 752.9   | 1180.2  | 1017.1  | 2341.2  | 2545.8  | 1674.0  | 2010.2  | 1611.9  |
| Bbr_0525 |       | 125.2   | 128.1   | 103.8   | 124.3   | 95.8    | 32.2    | 110.6   | 46.2    | 651.6   | 770.2   | 202.3   | 520.9   | 213.2   |
| Bbr_0526 |       | 282.9   | 388.8   | 239.6   | 242.7   | 181.5   | 332.7   | 251.9   | 207.3   | 942.3   | 1226.3  | 221.8   | 85.9    | 353.3   |
| Bbr_0527 |       | 4677.3  | 7392.6  | 4199.5  | 5055.5  | 7486.0  | 14797.4 | 6934.4  | 28714.6 | 2661.1  | 3424.8  | 1679.2  | 642.6   | 4639.6  |
| Bbr_0528 |       | 3250.1  | 3982.5  | 3057.9  | 2988.8  | 2186.8  | 3785.9  | 1929.2  | 1013.5  | 2208.7  | 2793.7  | 1935.6  | 1190.0  | 2428.1  |
| Bbr_0529 | lacZ5 | 3828.3  | 6074.4  | 3635.8  | 4273.5  | 4303.5  | 6238.3  | 3690.2  | 1430.4  | 1537.0  | 3763.5  | 1786.8  | 1034.7  | 3130.3  |
| Bbr_0530 |       | 4698.9  | 5399.1  | 4085.9  | 1519.2  | 3225.5  | 4597.8  | 2876.5  | 1684.2  | 2085.5  | 1985.9  | 4556.5  | 2302.0  | 3588.1  |
| Bbr_0531 |       | 402.2   | 349.3   | 301.6   | 242.5   | 196.6   | 196.1   | 260.7   | 62.0    | 931.8   | 1602.1  | 475.7   | 470.5   | 428.1   |
| Bbr_0532 |       | 532.3   | 753.2   | 442.6   | 536.1   | 268.8   | 424.3   | 298.8   | 1615.8  | 753.2   | 3622.9  | 436.9   | 491.1   | 614.5   |
| Bbr_0533 |       | 908.0   | 2200.6  | 926.7   | 3707.1  | 1063.1  | 2957.7  | 949.6   | 1567.0  | 6267.4  | 37605.9 | 1021.1  | 1324.3  | 1854.3  |
| Bbr_0534 |       | 1227.5  | 1297.0  | 1101.4  | 1319.5  | 1299.6  | 677.2   | 1376.6  | 1376.6  | 2238.0  | 6661.1  | 707.0   | 640.0   | 1112.7  |
| Bbr_0535 |       | 1332.7  | 1215.3  | 1163.8  | 1132.9  | 736.5   | 204.5   | 905.8   | 425.5   | 2233.9  | 3695.8  | 622.2   | 367.1   | 1165.8  |
| Bbr_0536 |       | 864.3   | 792.6   | 673.9   | 641.1   | 568.6   | 69.6    | 687.3   | 133.2   | 1121.4  | 2758.2  | 450.2   | 213.3   | 727.6   |
| Bbr_0537 |       | 881.2   | 758.3   | 789.5   | 640.9   | 724.8   | 122.4   | 799.7   | 201.1   | 1359.9  | 2290.8  | 523.3   | 219.9   | 846.4   |
| Bbr_0538 | cysK  | 552.3   | 440.7   | 535.1   | 491.6   | 438.4   | 639.9   | 519.0   | 1191.5  | 338.1   | 527.2   | 242.0   | 2140.7  | 437.5   |
| Bbr_0539 | metE  | 125.0   | 125.7   | 103.8   | 125.7   | 75.3    | 67.4    | 99.1    | 67.4    | 423.2   | 423.2   | 106.0   | 704.9   | 556.0   |
| Bbr_0540 | recO  | 443.2   | 375.0   | 411.4   | 268.9   | 431.7   | 91.2    | 488.7   | 417.7   | 593.1   | 878.1   | 319.2   | 357.4   | 447.9   |
| Bbr_0541 | luxS  | 8242.0  | 7616.0  | 8008.9  | 8801.0  | 6256.5  | 8254.6  | 5451.2  | 2633.2  | 4522.1  | 14517.7 | 3844.0  | 719.3   | 6054.1  |
| Bbr_0542 | cysE  | 1808.8  | 1741.3  | 1619.4  | 1784.2  | 982.4   | 1991.9  | 879.2   | 484.3   | 2160.3  | 4190.3  | 1218.0  | 402.7   | 1444.7  |
| Bbr_0543 | aap1  | 210.8   | 383.4   | 199.1   | 556.5   | 166.8   | 529.4   | 165.6   | 934.7   | 883.9   | 1323.9  | 406.7   | 173.1   | 338.8   |
| Bbr_0544 | air   | 1100.9  | 1424.4  | 948.8   | 1147.2  | 500.0   | 296.0   | 549.5   | 255.5   | 1261.6  | 1399.4  | 1233.7  | 728.5   | 932.4   |
| Bbr_0545 | dgt   | 595.5   | 413.8   | 510.1   | 238.5   | 345.0   | 63.2    | 463.2   | 141.9   | 614.1   | 878.7   | 420.4   | 316.8   | 491.4   |
| Bbr_0546 | dnaG  | 367.1   | 401.0   | 275.6   | 336.1   | 162.4   | 95.5    | 217.1   | 165.8   | 1606.0  | 626.8   | 472.3   | 626.8   | 389.6   |
| Bbr_0547 |       | 487.1   | 610.1   | 411.8   | 571.8   | 582.7   | 1424.1  | 652.2   | 196.3   | 1244.9  | 1893.1  | 489.2   | 3276.8  | 644.6   |
| Bbr_0548 |       | 302.6   | 345.7   | 283.6   | 347.1   | 370.4   | 816.0   | 428.0   | 5472.6  | 1169.3  | 1364.6  | 236.4   | 1330.6  | 465.1   |
| Bbr_0549 |       | 1568.0  | 2664.9  | 1503.1  | 1533.8  | 787.9   | 283.9   | 911.0   | 887.5   | 1454.7  | 870.2   | 2201.3  | 1476.7  | 1404.3  |
| Bbr_0550 |       | 1522.3  | 2562.7  | 1285.5  | 1148.4  | 839.2   | 258.1   | 1147.7  | 808.1   | 1861.0  | 905.8   | 1809.6  | 1209.3  | 1410.9  |
| Bbr_0551 |       | 282.0   | 302.5   | 197.4   | 164.5   | 179.4   | 98.5    | 258.3   | 273.4   | 658.1   | 785.8   | 170.0   | 119.0   | 290.9   |
| Bbr_0552 |       | 1459.9  | 1401.2  | 1148.1  | 1093.5  | 609.2   | 1429.3  | 907.4   | 5650.0  | 2727.4  | 3350.9  | 406.2   | 572.7   | 1313.6  |
| Bbr_0553 |       | 16020.9 | 14389.9 | 14256.4 | 11740.2 | 11767.2 | 20680.2 | 10793.9 | 30434.9 | 16539.7 | 13336.0 | 13745.3 | 23813.6 | 13853.9 |
| Bbr_0555 |       | 26.3    | 29.9    | 30.8    | 40.8    | 22.2    | 111.9   | 29.2    | 359.0   | 301.9   | 456.4   | 18.5    | 161.1   | 71.5    |
| Bbr_0556 |       | 62.6    | 66.9    | 49.1    | 57.7    | 41.2    | 127.5   | 54.5    | 149.8   | 678.1   | 325.6   | 79.7    | 557.6   | 160.9   |
| Bbr_0557 |       | 1441.0  | 1019.5  | 1250.5  | 202.6   | 1138.8  | 101.4   | 1306.2  | 263.4   | 612.9   | 457.0   | 1771.3  | 851.3   | 1253.5  |
| Bbr_0558 |       | 1535.7  | 1158.8  | 1280.6  | 354.9   | 1007.1  | 226.6   | 1231.0  | 545.4   | 1001.7  | 570.9   | 1547.6  | 848.2   | 1267.3  |
| Bbr_0559 | agl4  | 1805.2  | 1413.5  | 1441.5  | 451.1   | 782.8   | 353.7   | 776.8   | 776.8   | 1651.9  | 627.4   | 1819.0  | 1297.0  | 1402.4  |
| Bbr_0560 | dppA1 | 496.1   | 762.1   | 406.0   | 454.8   | 275.7   | 244.2   | 313.2   | 655.8   | 1656.5  | 478.8   | 951.7   | 350.7   | 683.2   |
| Bbr_0561 | msrA2 | 204.0   | 286.9   | 176.7   | 226.3   | 132.2   | 322.2   | 182.9   | 1167.4  | 492.2   | 925.2   | 330.3   | 286.5   | 253.1   |
| Bbr_0562 |       | 2116.5  | 696.2   | 1774.0  | 196.1   | 1175.3  | 169.4   | 1367.6  | 196.3   | 1203.7  | 436.0   | 1923.9  | 1538.8  | 1593.5  |
| Bbr_0563 |       | 2283.0  | 730.7   | 2106.7  | 197.3   | 1010.8  | 118.9   | 1136.0  | 150.0   | 954.6   | 447.2   | 2620.1  | 2384.6  | 1685.2  |
| Bbr_0564 |       | 3234.4  | 1204.7  | 2807.2  | 740.2   | 3282.2  | 624.2   | 3911.4  | 1465.5  | 2887.4  | 778.5   | 3068.0  | 3435.0  | 3198.5  |
| Bbr_0565 | dxs   | 942.5   | 1139.3  | 862.6   | 1304.6  | 595.9   | 478.4   | 677.8   | 524.7   | 1856.0  | 1250.4  | 925.5   | 805.4   | 976.7   |
| Bbr_0566 | adh3  | 1092.7  | 809.9   | 969.3   | 532.7   | 596.3   | 507.3   | 702.1   | 651.7   | 1072.4  | 1411.5  | 650.6   | 845.0   | 847.2   |
| Bbr_0567 | purE  | 3025.0  | 2988.9  | 2651.5  | 2438.9  | 1446.3  | 1431.5  | 1439.6  | 786.8   | 2448.0  | 2942.3  | 2772.2  | 1959.3  | 2297.1  |
| Bbr_0568 | purK  | 4173.9  | 4365.0  | 3582.8  | 3546.3  | 2830.5  | 2147.4  | 2444.4  | 2114.5  | 2599.3  | 2512.2  | 4027.8  | 3213.5  | 3276.4  |
| Bbr_0569 |       | 2038.4  | 1832.6  | 1457.3  | 1457.3  | 1414.3  | 1345.9  | 1414.3  | 933.3   | 923.6   | 2689.7  | 2768.6  | 3240.0  | 2699.0  |
| Bbr_0570 |       | 69.0    | 54.6    | 54.8    | 53.1    | 70.5    | 106.8   | 77.8    | 2195.4  | 648.3   | 513.0   | 26.5    | 143.8   | 157.8   |
| Bbr_0572 |       | 38.1    | 41.6    | 31.1    | 39.8    | 30.8    | 43.4    | 47.3    | 45.1    | 315.6   | 236.6   | 29.3    | 312.7   | 82.0    |
| Bbr_0573 |       | 760.0   | 927.4   | 600.2   | 911.1   | 395.9   | 567.3   | 494.5   | 583.3   | 724.2   | 500.0   | 601.0   | 1449.3  | 596.0   |
| Bbr_0574 |       | 386.5   | 507.7   | 354.3   | 486.6   | 247.1   | 108.2   | 332.3   | 489.2   | 276.4   | 413.7   | 238.1   | 133.4   | 305.8   |
| Bbr_0575 |       | 917.0   | 1022.7  | 822.6   | 1096.7  | 453.4   | 1148.2  | 512.3   | 4617.3  | 615.2   | 1079.0  | 366.5   | 620.9   | 614.5   |
| Bbr_0576 |       | 64.5    | 70.5    | 32.1    | 57.6    | 43.1    | 131.3   | 61.2    | 403.3   | 722.9   | 802.9   | 23.2    | 31.3    | 157.8   |
| Bbr_0579 | rpmE1 | 163.7   | 153.7   | 176.2   | 176.2   | 139.7   | 176.2   | 239.7   | 241.1   | 453.3   | 435.3   | 314.4   | 110.1   | 279.0   |
| Bbr_0579 |       | 1466.1  | 1674.9  | 1340.8  | 1817.4  | 821.6   | 821.6   | 2246.3  | 1657.0  | 1279.0  | 927.5   | 815.3   | 1271.3  | 1484.2  |
| Bbr_0580 |       | 1655.2  | 1074.1  | 1703.8  | 1018.2  | 1101.9  | 308.3   | 1353.3  | 438.4   | 3620.1  | 3798.7  | 2348.9  | 1662.0  | 1963.9  |
| Bbr_0581 | aldH  | 841.5   | 434.7   | 637.4   | 266.6   | 564.1   | 181.2   | 793.0   | 244.7   | 1531.1  | 2176.4  | 724.3   | 948.3   | 848.5   |
| Bbr_0582 | purD  | 2003.1  | 2077.0  | 1683.0  | 2020.6  | 1546.5  | 737.1   | 2013.5  | 1896.9  | 2220.8  | 2565.1  | 2342.7  | 1968.3  | 1968.3  |
| Bbr_0583 | purM  | 3334.3  | 3379.9  | 3457.7  | 3672.3  | 1947.9  | 1369.5  | 2033.2  | 687.5   | 4956.9  | 4168.2  | 4117.6  | 2040.2  | 3307.9  |
| Bbr_0584 | purF  | 4731.6  | 6183.8  | 3960.4  | 7315.7  | 2702.0  | 3526.8  | 2383.0  | 517.0   | 5157.8  | 5111.7  | 3711.1  | 1532.5  | 3774.3  |
| Bbr_0585 |       | 160.1   | 211.2   | 107.0   | 211.2   | 145.9   | 437.0   | 110.5   | 142.1   | 2427.4  | 2427.4  | 107.0   | 521.1   | 359.0   |
| Bbr_0586 |       | 707.4   | 608.6   | 533.1   |         |         |         |         |         |         |         |         |         |         |

|          |         |         |          |         |         |         |          |         |          |         |          |         |          |
|----------|---------|---------|----------|---------|---------|---------|----------|---------|----------|---------|----------|---------|----------|
| Bbr_0588 | 129.6   | 152.0   | 93.4     | 123.8   | 108.9   | 125.2   | 133.7    | 190.7   | 1469.1   | 485.7   | 120.6    | 252.5   | 342.5    |
| Bbr_0589 | 89.2    | 90.8    | 69.4     | 82.3    | 62.2    | 413.1   | 84.9     | 1620.8  | 1600.3   | 937.9   | 82.0     | 462.0   | 331.3    |
| Bbr_0590 | 22.7    | 30.4    | 18.6     | 26.6    | 25.8    | 20.8    | 44.2     | 27.4    | 880.4    | 361.8   | 17.8     | 60.6    | 168.3    |
| Bbr_0591 | 231.6   | 321.1   | 189.3    | 359.4   | 118.3   | 547.8   | 163.1    | 290.8   | 792.6    | 398.3   | 171.9    | 650.1   | 277.8    |
| Bbr_0592 | 18.7    | 22.9    | 11.6     | 23.8    | 29.1    | 39.6    | 20.8     | 135.8   | 325.8    | 349.3   | 9.7      | 145.2   | 69.3     |
| Bbr_0593 | 207.2   | 176.1   | 151.9    | 174.8   | 64.8    | 740.2   | 194.3    | 1917.5  | 906.5    | 1171.2  | 96.8     | 714.8   | 266.7    |
| Bbr_0594 | 566.2   | 600.8   | 461.7    | 552.6   | 608.8   | 72.9    | 675.0    | 144.1   | 1046.1   | 694.4   | 215.0    | 424.5   | 630.4    |
| Bbr_0595 | 345.9   | 365.8   | 303.3    | 262.4   | 173.0   | 65.6    | 216.8    | 68.6    | 508.1    | 644.4   | 353.7    | 224.9   | 316.8    |
| Bbr_0596 | 585.2   | 617.2   | 508.3    | 493.5   | 627.5   | 333.2   | 731.5    | 864.5   | 1398.4   | 1545.3  | 731.7    | 754.2   | 763.8    |
| Bbr_0597 | 2076.8  | 2249.3  | 1918.8   | 1900.2  | 1287.0  | 853.7   | 1480.8   | 1188.3  | 1852.6   | 2272.5  | 4244.8   | 3336.0  | 2143.5   |
| Bbr_0598 | 4754.3  | 4797.3  | 4613.8   | 4102.1  | 3526.9  | 1937.9  | 3617.7   | 800.0   | 4361.6   | 4046.4  | 6392.2   | 2159.5  | 4544.4   |
| Bbr_0599 | 1979.3  | 2004.2  | 1711.7   | 1642.9  | 1443.6  | 1071.9  | 1574.7   | 1072.9  | 1170.1   | 2742.2  | 1094.8   | 862.8   | 1495.7   |
| Bbr_0600 | 65.5    | 72.8    | 45.2     | 56.0    | 66.3    | 330.5   | 97.4     | 6180.0  | 425.2    | 417.3   | 33.2     | 237.6   | 122.1    |
| Bbr_0601 | 900.8   | 490.6   | 795.4    | 307.8   | 484.3   | 100.2   | 611.2    | 245.0   | 2104.0   | 1933.6  | 1460.7   | 1952.6  | 1059.4   |
| Bbr_0602 | 674.2   | 732.6   | 565.4    | 528.4   | 284.5   | 262.3   | 353.9    | 83.9    | 917.3    | 1007.0  | 839.0    | 1443.1  | 605.7    |
| Bbr_0603 | 961.6   | 1440.0  | 827.1    | 714.5   | 739.4   | 144.5   | 952.4    | 456.9   | 240.4    | 268.5   | 806.6    | 380.5   | 754.6    |
| Bbr_0604 | 16109.5 | 23956.4 | 18945.0  | 26283.9 | 20802.5 | 21638.3 | 22245.7  | 35355.6 | 10763.8  | 7921.1  | 14851.8  | 20518.4 | 17286.4  |
| Bbr_0605 | 17247.1 | 24970.3 | 19114.0  | 27343.2 | 23540.8 | 16241.2 | 19580.3  | 6981.9  | 10052.6  | 6519.0  | 16572.4  | 20992.5 | 17684.5  |
| Bbr_0606 | 7623.0  | 13025.0 | 8568.0   | 15693.9 | 6275.5  | 5900.4  | 5988.1   | 1375.6  | 4270.0   | 3675.5  | 8354.1   | 11081.4 | 6846.5   |
| Bbr_0607 | 19193.7 | 60168.6 | 109931.0 | 63653.3 | 93440.3 | 42165.1 | 148879.9 | 34979.5 | 128453.1 | 59221.3 | 126217.4 | 74100.0 | 113145.9 |
| Bbr_0608 | 1334.6  | 1000.3  | 1230.1   | 615.8   | 1180.5  | 1351.6  | 1472.4   | 525.6   | 753.1    | 1073.6  | 862.1    | 3074.7  | 1105.5   |
| Bbr_0609 | 847.5   | 693.4   | 616.7    | 548.7   | 558.3   | 259.6   | 713.7    | 479.7   | 1089.9   | 956.4   | 353.0    | 1046.3  | 696.5    |
| Bbr_0610 | 2857.4  | 5072.0  | 2436.2   | 3551.5  | 1689.6  | 754.1   | 2158.4   | 1117.4  | 426.5    | 379.1   | 678.4    | 467.5   | 1707.8   |
| Bbr_0611 | 438.5   | 507.5   | 394.3    | 425.6   | 234.0   | 683.4   | 248.9    | 1105.1  | 377.1    | 491.5   | 1684.3   | 631.9   | 562.8    |
| Bbr_0612 | 635.7   | 656.9   | 511.8    | 565.6   | 507.3   | 589.4   | 559.8    | 700.5   | 823.5    | 583.3   | 2284.3   | 924.5   | 887.1    |
| Bbr_0613 | 477.6   | 612.4   | 412.7    | 756.2   | 510.9   | 3440.0  | 463.3    | 4139.2  | 1062.1   | 1922.3  | 1428.8   | 622.7   | 725.9    |
| Bbr_0614 | 785.7   | 837.2   | 647.6    | 589.3   | 589.6   | 355.1   | 784.8    | 714.3   | 462.3    | 614.6   | 543.4    | 257.5   | 638.9    |
| Bbr_0615 | 620.9   | 641.4   | 609.0    | 463.6   | 1177.0  | 462.0   | 583.5    | 583.5   | 374.0    | 394.4   | 374.0    | 132.6   | 664.3    |
| Bbr_0616 | 414.3   | 594.1   | 333.1    | 519.6   | 216.8   | 1015.8  | 227.7    | 589.7   | 1034.0   | 1364.1  | 307.6    | 1142.2  | 422.3    |
| Bbr_0617 | 509.7   | 697.0   | 390.0    | 908.5   | 723.0   | 2676.7  | 720.7    | 720.7   | 381.2    | 537.3   | 322.2    | 473.5   | 450.7    |
| Bbr_0618 | 187.4   | 184.6   | 140.6    | 136.2   | 106.1   | 70.3    | 130.0    | 150.6   | 337.4    | 497.9   | 253.4    | 188.0   | 192.5    |
| Bbr_0619 | 166.7   | 228.5   | 132.7    | 197.7   | 105.0   | 41.2    | 138.1    | 87.1    | 292.6    | 315.5   | 175.7    | 137.3   | 168.5    |
| Bbr_0620 | 120.8   | 194.0   | 89.9     | 138.9   | 75.3    | 110.4   | 98.4     | 307.3   | 389.0    | 382.1   | 115.0    | 62.6    | 148.1    |
| Bbr_0621 | 164.0   | 163.1   | 148.8    | 163.8   | 143.8   | 218.5   | 196.5    | 269.7   | 264.3    | 441.0   | 108.7    | 77.9    | 171.0    |
| Bbr_0622 | 459.9   | 351.0   | 395.4    | 351.0   | 384.5   | 384.5   | 384.5    | 384.5   | 384.5    | 384.5   | 149.9    | 304.3   | 391.4    |
| Bbr_0624 | 391.4   | 524.2   | 332.8    | 508.5   | 337.1   | 497.5   | 406.4    | 717.1   | 753.6    | 642.6   | 201.6    | 148.1   | 403.8    |
| Bbr_0625 | 697.6   | 331.8   | 647.2    | 389.0   | 357.6   | 2553.8  | 357.6    | 1706.6  | 613.0    | 915.4   | 110.8    | 408.3   | 468.1    |
| Bbr_0626 | 949.2   | 630.5   | 837.9    | 388.8   | 654.0   | 123.9   | 842.1    | 127.7   | 1093.0   | 1029.3  | 583.1    | 430.7   | 826.6    |
| Bbr_0627 | 467.3   | 337.8   | 409.9    | 260.9   | 303.0   | 79.0    | 464.6    | 84.7    | 704.1    | 534.5   | 847.7    | 310.9   | 532.8    |
| Bbr_0628 | 341.3   | 198.5   | 332.9    | 295.3   | 97.0    | 67.5    | 486.4    | 440.0   | 506.4    | 535.2   | 636.1    | 325.4   | 433.1    |
| Bbr_0629 | 734.8   | 582.0   | 570.7    | 438.5   | 609.0   | 262.4   | 662.0    | 896.3   | 729.9    | 2112.1  | 467.7    | 290.4   | 629.0    |
| Bbr_0630 | 782.1   | 674.5   | 694.5    | 719.8   | 694.5   | 1735.9  | 631.8    | 2895.2  | 2227.3   | 3941.5  | 593.7    | 525.0   | 921.4    |
| Bbr_0631 | 8423.0  | 9705.4  | 8825.4   | 10922.2 | 9500.7  | 13217.3 | 5603.7   | 7089.1  | 10264.5  | 8964.7  | 10190.0  | 5457.7  | 8801.3   |
| Bbr_0632 | 12076.0 | 12363.2 | 13100.1  | 13756.3 | 34761.1 | 13359.2 | 18093.3  | 14966.7 | 12951.8  | 9754.9  | 11684.5  | 7188.9  | 17112.0  |
| Bbr_0633 | 8216.0  | 9217.2  | 8191.1   | 7541.0  | 10280.3 | 3059.3  | 9699.2   | 2578.1  | 9742.7   | 6542.7  | 7589.9   | 3080.5  | 8953.2   |
| Bbr_0634 | 4654.5  | 5216.1  | 4379.9   | 5544.8  | 4778.2  | 1657.0  | 4239.1   | 1889.6  | 3182.6   | 3016.4  | 4133.5   | 2987.9  | 4357.7   |
| Bbr_0635 | 3586.1  | 3717.1  | 3238.8   | 3399.9  | 2028.3  | 1006.5  | 2173.4   | 753.3   | 2233.1   | 2062.3  | 3199.9   | 2576.3  | 2743.2   |
| Bbr_0636 | 3085.5  | 2889.5  | 2700.7   | 3166.0  | 812.2   | 2757.6  | 3166.0   | 746.1   | 2362.9   | 1706.0  | 2320.0   | 2717.0  | 2686.6   |
| Bbr_0637 | 390.5   | 577.2   | 313.4    | 517.2   | 294.6   | 608.3   | 339.7    | 507.6   | 1014.1   | 1105.3  | 404.7    | 262.1   | 459.5    |
| Bbr_0638 | 33.4    | 35.5    | 18.8     | 34.7    | 140.5   | 31.3    | 91.3     | 1925.0  | 670.8    | 318.7   | 9.0      | 192.2   | 143.0    |
| Bbr_0639 | 201.0   | 362.1   | 174.0    | 236.8   | 234.2   | 34.2    | 266.2    | 101.3   | 616.4    | 429.3   | 187.1    | 153.5   | 279.8    |
| Bbr_0640 | 676.5   | 766.4   | 560.3    | 556.9   | 338.3   | 220.9   | 397.6    | 342.0   | 696.4    | 863.3   | 448.0    | 188.8   | 519.5    |
| Bbr_0641 | 158.1   | 184.6   | 123.2    | 146.7   | 173.4   | 599.9   | 202.8    | 2495.3  | 861.0    | 1043.6  | 133.6    | 389.6   | 270.9    |
| Bbr_0642 | 9578.9  | 9755.9  | 8129.0   | 10092.3 | 6846.8  | 3838.7  | 5825.5   | 1520.3  | 4812.4   | 12025.4 | 2608.3   | 932.3   | 6300.1   |
| Bbr_0643 | 4725.0  | 3413.7  | 3663.9   | 1474.6  | 786.5   | 2318.2  | 2297.3   | 657.6   | 1496.7   | 2106.5  | 1433.8   | 1175.0  | 2655.8   |
| Bbr_0645 | 559.7   | 854.1   | 562.2    | 631.4   | 307.9   | 361.5   | 426.6    | 341.1   | 544.9    | 1024.4  | 967.6    | 776.4   | 561.8    |
| Bbr_0646 | 848.3   | 918.6   | 766.8    | 867.7   | 738.3   | 1006.3  | 752.1    | 1014.4  | 1626.0   | 2027.1  | 848.4    | 889.2   | 930.0    |
| Bbr_0647 | 751.7   | 760.7   | 597.7    | 505.5   | 423.7   | 534.7   | 261.4    | 261.4   | 1411.7   | 1248.6  | 1057.8   | 671.7   | 796.2    |
| Bbr_0648 | 1264.6  | 1312.2  | 1215.4   | 1454.6  | 959.2   | 736.4   | 1082.0   | 811.9   | 648.6    | 1805.2  | 403.4    | 282.6   | 928.9    |
| Bbr_0649 | 511.1   | 515.5   | 482.0    | 485.0   | 281.2   | 756.3   | 388.7    | 5964.8  | 687.8    | 1751.7  | 396.8    | 223.1   | 457.9    |
| Bbr_0650 | 6404.9  | 5046.6  | 7016.9   | 6371.1  | 5010.6  | 5364.9  | 5403.2   | 5541.2  | 4106.2   | 10521.9 | 2970.9   | 1081.5  | 5152.1   |
| Bbr_0651 | 3640.8  | 4072.7  | 3379.3   | 3814.4  | 1035.2  | 1736.4  | 1101.0   | 1101.0  | 2634.5   | 3932.0  | 2166.7   | 1226.3  | 2556.3   |
| Bbr_0652 | 557.6   | 579.2   | 463.6    | 469.7   | 334.3   | 216.3   | 435.2    | 622.6   | 628.7    | 1324.7  | 361.1    | 371.3   | 463.4    |
| Bbr_0653 | 5051.6  | 4201.0  | 4788.0   | 4932.2  | 3850.4  | 1364.7  | 4402.2   | 988.3   | 3287.7   | 11054.0 | 2250.7   | 1964.7  | 3939.9   |
| Bbr_0654 | 130.8   | 153.7   | 110.7    | 194.2   | 100.3   | 128.8   | 120.3    | 120.3   | 607.2    | 2669.5  | 85.1     | 117.8   | 192.4    |
| Bbr_0655 | 2302.3  | 2739.6  | 1764.3   | 2723.0  | 1419.1  | 1519.7  | 1421.6   | 1702.1  | 2670.0   | 3728.1  | 1969.3   | 1359.2  | 1924.4   |
| Bbr_0656 | 1777.4  | 1952.0  | 1589.3   | 1562.3  | 1215.4  | 273.3   | 1615.8   | 1615.8  | 2638.8   | 2638.8  | 2030.6   | 2675.4  | 1555.9   |
| Bbr_0657 | 3315.6  | 3693.7  | 2933.8   | 3587.4  | 2451.4  | 919.9   | 2828.7   | 606.6   | 1978.2   | 1880.9  | 2695.4   | 2300.4  | 2700.5   |
| Bbr_0658 | 2056.9  | 2453.3  | 1934.8   | 2701.4  | 1663.8  | 740.9   | 2126.4   | 1127.4  | 1554.0   | 1495.2  | 1648.9   | 1711.2  | 1830.8   |
| Bbr_0659 | 939.2   | 974.3   | 860.7    | 1172.8  | 636.1   | 167.0   | 887.6    | 118.9   | 942.8    | 1162.4  | 764.0    | 807.4   | 838.4    |
| Bbr_0660 | 805.2   | 856.8   | 621.6    | 711.6   | 621.6   | 621.6   | 656.5    | 621.6   | 653.7    | 621.6   | 653.7    | 621.6   | 709.8    |
| Bbr_0661 | 1368.4  | 1663.1  | 1132.7   | 1328.6  | 1318.1  | 425.8   | 1588.0   | 704.2   | 1049.8   | 1823.7  | 871.0    | 1227.3  | 907.0    |
| Bbr_0662 | 585.0   | 519.5   | 479.4    | 435.3   | 423.6   | 362.0   | 582.4    | 131.9   | 830.0    | 865.7   | 923.7    | 559.1   | 637.3    |
| Bbr_0663 | 5859.0  | 5780.1  | 5470.9   | 4715.9  | 5300.7  | 3872.8  | 5794.0   | 2568.8  | 4323.3   | 3267.0  | 6898.1   | 4513.2  | 5607.6   |
| Bbr_0664 | 448.7   | 533.8   | 365.1    | 568.7   | 253.6   | 220.9   | 342.8    | 150.3   | 746.2    | 1697.8  | 371.3    | 259.9   | 421.3    |
| Bbr_0665 | 842.4   | 991.9   | 753.1    | 1012.9  | 466.9   | 840.5   | 512.0    | 1289.0  | 837.0    | 2337.3  | 846.4    | 608.4   | 709.6    |
| Bbr_0666 | 586.1   | 625.8   | 469.8    | 435.5   | 267.5   | 118.5   | 331.5    | 158.9   | 623.1    | 593.3   | 527.3    | 205.4   | 467.5    |
| Bbr_0667 | 2574.7  | 2141.2  | 2265.7   | 1515.4  | 3015.9  | 1515.4  | 1771.1   | 3015.9  | 1771.1   | 3015.9  | 1771.1   | 1572.2  | 2467.3   |
| Bbr_0668 | 981.5   | 982.2   | 765.5    | 834.7   | 516.6   | 126.2   | 659.1    | 213.9   | 506.4    | 1474.2  | 534.3    | 307.9   | 660.6    |



|          |       |         |         |         |         |          |         |          |          |         |         |         |         |         |
|----------|-------|---------|---------|---------|---------|----------|---------|----------|----------|---------|---------|---------|---------|---------|
| Bbr_0669 | mnp   | 805.6   | 894.1   | 632.6   | 742.5   | 619.6    | 639.1   | 671.7    | 859.6    | 725.2   | 2379.8  | 924.3   | 538.5   | 729.8   |
| Bbr_0670 | glnA1 | 5994.2  | 8605.2  | 5333.0  | 4282.3  | 3669.3   | 1123.2  | 3754.8   | 1452.4   | 2579.0  | 942.2   | 7167.0  | 5906.4  | 4749.6  |
| Bbr_0671 |       | 7663.1  | 7201.7  | 6461.5  | 5190.1  | 10086.8  | 9245.0  | 7713.9   | 7081.6   | 4978.7  | 6469.1  | 4643.2  | 3771.7  | 6924.5  |
| Bbr_0672 | pdhD  | 3602.0  | 2552.6  | 3382.2  | 1433.6  | 2885.6   | 796.3   | 3200.1   | 485.6    | 2028.3  | 3765.8  | 1577.1  | 842.1   | 2779.2  |
| Bbr_0673 |       | 1011.2  | 1079.0  | 878.8   | 1173.4  | 537.5    | 449.5   | 603.7    | 146.4    | 1060.2  | 2232.3  | 1872.9  | 665.8   | 994.1   |
| Bbr_0674 |       | 1677.5  | 1202.7  | 1203.7  | 1677.5  | 963.3    | 1435.0  | 1169.0   | 1909.0   | 2132.6  | 4098.9  | 1718.8  | 1724.5  | 1411.2  |
| Bbr_0675 |       | 611.5   | 809.3   | 483.7   | 838.0   | 483.1    | 1934.3  | 583.8    | 7111.1   | 1209.6  | 1554.6  | 995.2   | 1689.7  | 727.8   |
| Bbr_0676 |       | 154.2   | 204.1   | 109.3   | 211.1   | 101.0    | 90.7    | 136.3    | 167.2    | 333.7   | 350.2   | 176.5   | 247.8   | 168.5   |
| Bbr_0677 |       | 109.4   | 155.9   | 86.7    | 164.2   | 75.4     | 34.2    | 97.7     | 103.4    | 247.8   | 246.5   | 105.8   | 102.8   | 120.5   |
| Bbr_0678 |       | 1159.3  | 1169.1  | 958.3   | 1124.8  | 666.3    | 583.7   | 736.4    | 573.8    | 1488.0  | 3928.1  | 1123.4  | 943.1   | 1022.0  |
| Bbr_0679 | pheS  | 2843.2  | 3326.9  | 2512.6  | 3305.2  | 1521.3   | 2033.2  | 1601.8   | 992.3    | 4551.5  | 6391.3  | 3137.3  | 1478.7  | 2694.6  |
| Bbr_0680 | pheT  | 3457.6  | 3779.4  | 3326.3  | 3967.5  | 3032.3   | 708.5   | 2467.1   | 569.2    | 3022.7  | 4389.2  | 3426.6  | 2407.8  | 3122.1  |
| Bbr_0681 |       | 1556.1  | 1521.1  | 1365.4  | 1295.7  | 816.5    | 127.2   | 940.5    | 120.3    | 1987.0  | 1904.2  | 1956.2  | 1579.4  | 1437.0  |
| Bbr_0682 | argC  | 2233.4  | 2739.4  | 2085.0  | 2911.2  | 3361.9   | 3747.6  | 2698.5   | 7312.7   | 2221.7  | 3569.4  | 1994.9  | 3448.7  | 2432.5  |
| Bbr_0683 | argJ  | 1733.4  | 2316.8  | 1642.9  | 2639.9  | 803.1    | 1033.2  | 831.9    | 203.4    | 1400.0  | 2263.1  | 1457.7  | 1905.1  | 1311.5  |
| Bbr_0684 | argB  | 1848.4  | 2600.2  | 1634.3  | 2977.3  | 1203.7   | 1309.2  | 1472.6   | 1630.5   | 1642.0  | 2093.9  | 1785.5  | 2273.0  | 1597.8  |
| Bbr_0685 | argD  | 2130.6  | 2984.1  | 2098.6  | 3783.1  | 1660.2   | 1411.8  | 1853.6   | 1505.6   | 981.0   | 1336.4  | 1091.4  | 1147.2  | 1635.9  |
| Bbr_0686 | argF  | 1815.8  | 2443.3  | 1630.6  | 2721.6  | 907.4    | 757.7   | 904.4    | 609.1    | 1457.7  | 1433.3  | 1725.1  | 1625.9  | 1406.8  |
| Bbr_0687 | argR  | 1470.5  | 2103.9  | 1319.6  | 2491.3  | 926.3    | 524.4   | 1164.6   | 726.6    | 942.3   | 1275.5  | 1015.7  | 827.2   | 1139.8  |
| Bbr_0688 | argG  | 1820.2  | 1904.7  | 1588.0  | 1783.8  | 947.5    | 1126.9  | 906.8    | 311.6    | 2792.0  | 2338.1  | 3301.8  | 2260.0  | 1892.7  |
| Bbr_0690 |       | 5082.0  | 6389.7  | 4744.2  | 8319.2  | 11614.3  | 30768.1 | 12204.0  | 106219.2 | 15027.5 | 3145.1  | 1791.2  | 6971.7  | 8412.2  |
| Bbr_0691 |       | 5143.3  | 5611.6  | 4432.7  | 5546.4  | 5055.2   | 14956.4 | 3209.1   | 11776.6  | 17848.0 | 2623.3  | 1527.5  | 4461.9  | 6202.7  |
| Bbr_0692 | argH  | 1726.9  | 1769.7  | 1350.5  | 1396.0  | 944.5    | 1166.1  | 759.4    | 357.7    | 3167.1  | 4613.6  | 2347.6  | 1551.8  | 1783.8  |
| Bbr_0693 | thiS  | 800.4   | 896.8   | 701.2   | 807.1   | 448.5    | 1451.9  | 487.8    | 2604.0   | 1040.3  | 1965.2  | 575.1   | 1542.5  | 675.6   |
| Bbr_0694 | thiG  | 600.9   | 635.4   | 543.4   | 544.5   | 776.8    | 885.0   | 850.0    | 813.0    | 1124.7  | 1707.7  | 1235.3  | 574.0   | 672.4   |
| Bbr_0695 | thiF  | 483.6   | 478.6   | 377.7   | 355.9   | 329.4    | 720.1   | 416.2    | 620.0    | 6745.1  | 4101.1  | 345.6   | 863.5   | 1449.6  |
| Bbr_0696 |       | 99.5    | 111.7   | 83.9    | 68.1    | 85.2     | 183.8   | 113.2    | 566.5    | 719.0   | 863.7   | 131.2   | 389.9   | 205.3   |
| Bbr_0697 |       | 1716.7  | 1636.4  | 1446.9  | 1168.1  | 1195.1   | 1186.7  | 1486.7   | 1723.7   | 3076.7  | 5026.7  | 2030.7  | 1150.1  | 1967.3  |
| Bbr_0698 |       | 592.4   | 522.8   | 509.5   | 409.9   | 326.6    | 126.5   | 401.6    | 77.0     | 1408.9  | 1905.3  | 785.3   | 490.1   | 670.7   |
| Bbr_0699 | tyrS  | 168.6   | 156.3   | 126.9   | 90.3    | 98.7     | 66.2    | 123.1    | 157.6    | 644.8   | 707.8   | 134.1   | 85.8    | 216.0   |
| Bbr_0700 |       | 4183.8  | 5436.5  | 3538.6  | 2801.2  | 3102.0   | 1866.0  | 3352.3   | 1461.1   | 3758.4  | 5278.0  | 3276.7  | 2470.7  | 3535.3  |
| Bbr_0701 |       | 3084.4  | 3523.8  | 2734.3  | 1555.1  | 527.5    | 1634.5  | 371.5    | 2568.2   | 4327.8  | 4118.6  | 3237.8  | 2615.8  | 2615.8  |
| Bbr_0702 |       | 2049.2  | 2311.6  | 1987.4  | 1921.8  | 1839.8   | 416.1   | 1636.8   | 702.0    | 2153.3  | 3663.8  | 2281.7  | 2049.5  | 1991.3  |
| Bbr_0703 |       | 687.5   | 736.1   | 553.1   | 609.7   | 497.3    | 119.1   | 667.1    | 291.5    | 1142.2  | 1666.1  | 693.5   | 1025.1  | 701.8   |
| Bbr_0704 |       | 463.9   | 462.1   | 301.6   | 421.0   | 389.9    | 301.6   | 324.9    | 301.6    | 324.9   | 301.6   | 324.9   | 301.6   | 324.9   |
| Bbr_0707 |       | 1111.9  | 1110.9  | 964.3   | 1029.9  | 893.2    | 1407.9  | 1061.8   | 3801.1   | 1633.0  | 2314.9  | 837.3   | 1165.6  | 1083.6  |
| Bbr_0708 | recN  | 756.8   | 754.8   | 623.2   | 641.4   | 517.8    | 626.9   | 149.5    | 1106.6   | 1672.8  | 1672.8  | 661.7   | 668.8   | 715.5   |
| Bbr_0709 |       | 392.8   | 380.3   | 327.4   | 337.0   | 303.3    | 42.4    | 376.8    | 189.0    | 587.6   | 832.6   | 330.0   | 234.1   | 386.3   |
| Bbr_0711 |       | 375.9   | 308.9   | 295.6   | 179.3   | 403.6    | 289.0   | 289.0    | 3174.5   | 454.4   | 569.6   | 253.6   | 384.3   | 317.9   |
| Bbr_0712 |       | 484.6   | 390.9   | 425.0   | 312.0   | 275.2    | 336.6   | 327.9    | 902.2    | 1419.8  | 718.2   | 696.2   | 532.6   | 577.5   |
| Bbr_0713 |       | 371.5   | 321.2   | 293.3   | 237.5   | 226.8    | 178.3   | 178.3    | 178.1    | 907.0   | 426.8   | 313.6   | 238.5   | 395.8   |
| Bbr_0714 |       | 23.5    | 27.1    | 30.9    | 22.0    | 22.6     | 20.9    | 29.5     | 61.7     | 556.9   | 19.5    | 226.2   | 6.1     | 110.2   |
| Bbr_0715 | thiC  | 1661.6  | 1408.4  | 1705.8  | 1400.2  | 2384.3   | 1135.2  | 2287.6   | 642.5    | 1772.7  | 3548.5  | 1334.5  | 1005.5  | 1857.7  |
| Bbr_0716 | proA  | 4079.3  | 4013.6  | 3580.5  | 2651.4  | 3383.7   | 499.5   | 2417.4   | 499.5    | 2417.4  | 3346.7  | 2468.9  | 1114.5  | 3131.5  |
| Bbr_0717 |       | 3902.6  | 3607.8  | 3394.8  | 2406.0  | 2360.4   | 386.4   | 2749.2   | 728.7    | 2484.6  | 3476.9  | 2643.6  | 1360.5  | 2922.5  |
| Bbr_0718 | nadD  | 2861.3  | 2504.4  | 2664.5  | 1754.4  | 1375.6   | 296.1   | 1433.3   | 383.0    | 3302.2  | 2830.2  | 2457.1  | 1587.4  | 2349.0  |
| Bbr_0720 |       | 5059.1  | 3757.3  | 4607.3  | 3297.0  | 3341.4   | 411.4   | 3865.8   | 702.3    | 3461.7  | 12493.5 | 2559.2  | 3061.4  | 3815.7  |
| Bbr_0721 |       | 925.4   | 826.6   | 778.2   | 853.2   | 643.5    | 336.4   | 421.7    | 1582.4   | 4144.4  | 4144.4  | 581.7   | 1166.4  | 885.3   |
| Bbr_0722 | pth   | 962.0   | 1024.3  | 773.4   | 1137.4  | 580.3    | 1404.8  | 603.2    | 806.7    | 1923.1  | 4371.7  | 1506.3  | 2202.7  | 1041.4  |
| Bbr_0723 | mfd   | 300.3   | 321.4   | 254.9   | 246.4   | 43.3     | 234.5   | 237.4    | 89.4     | 532.6   | 705.4   | 726.5   | 279.6   | 391.0   |
| Bbr_0724 |       | 430.2   | 464.2   | 359.5   | 276.8   | 210.5    | 36.0    | 246.1    | 55.7     | 540.5   | 656.2   | 806.1   | 206.3   | 432.2   |
| Bbr_0725 | eno   | 51675.7 | 34758.0 | 64548.5 | 37961.4 | 100473.5 | 21500.7 | 112889.7 | 16004.0  | 49751.1 | 38679.2 | 77809.1 | 28062.0 | 76191.3 |
| Bbr_0726 |       | 1359.6  | 1594.2  | 1238.8  | 2105.8  | 1741.9   | 4842.6  | 1321.5   | 488.7    | 1009.2  | 1474.4  | 1209.5  | 2065.0  | 1313.4  |
| Bbr_0727 |       | 820.2   | 903.4   | 755.1   | 1060.7  | 956.2    | 2703.0  | 1072.4   | 949.0    | 1122.0  | 1110.0  | 853.1   | 2600.3  | 929.8   |
| Bbr_0728 |       | 780.5   | 817.0   | 667.0   | 791.6   | 676.7    | 1963.9  | 676.5    | 568.4    | 1178.2  | 1078.8  | 1160.3  | 2871.3  | 856.5   |
| Bbr_0729 |       | 325.9   | 368.7   | 243.9   | 335.4   | 200.1    | 601.7   | 231.2    | 1125.3   | 564.1   | 783.1   | 407.2   | 786.5   | 329.7   |
| Bbr_0730 | sdaA  | 558.0   | 824.2   | 435.0   | 476.6   | 388.4    | 579.4   | 492.4    | 752.1    | 2392.6  | 2392.6  | 795.0   | 686.3   | 616.8   |
| Bbr_0731 | fkfP  | 8272.1  | 7931.6  | 7569.5  | 5832.0  | 7549.5   | 2751.1  | 7835.3   | 3101.9   | 4870.9  | 3264.8  | 5791.3  | 10177.8 | 6981.4  |
| Bbr_0732 | greA  | 7557.4  | 10094.2 | 6959.3  | 7104.5  | 4161.6   | 2804.9  | 3809.8   | 1247.5   | 1790.0  | 1976.1  | 4392.7  | 11556.8 | 4778.5  |
| Bbr_0733 |       | 275.9   | 480.8   | 205.4   | 342.8   | 138.9    | 371.9   | 160.8    | 726.9    | 717.2   | 845.7   | 54.9    | 448.7   | 258.8   |
| Bbr_0734 |       | 3100.5  | 2794.2  | 2572.2  | 2658.4  | 1640.9   | 932.7   | 1777.7   | 680.4    | 1942.1  | 5225.3  | 1364.9  | 1648.3  | 2066.4  |
| Bbr_0735 |       | 3363.2  | 3673.7  | 2939.7  | 5505.9  | 2597.9   | 10463.1 | 2535.7   | 15226.6  | 2385.0  | 8186.5  | 2947.5  | 3623.8  | 2794.8  |
| Bbr_0736 |       | 142.1   | 146.5   | 98.2    | 106.1   | 122.7    | 149.9   | 159.7    | 414.5    | 245.9   | 574.7   | 76.9    | 147.9   | 139.3   |
| Bbr_0737 |       | 3213.3  | 3281.3  | 2931.2  | 2727.5  | 1632.9   | 641.4   | 1620.5   | 471.6    | 2178.2  | 2192.6  | 1940.9  | 2866.8  | 2332.8  |
| Bbr_0739 | whiB2 | 2049.0  | 1781.5  | 1670.3  | 1470.7  | 1842.8   | 1167.5  | 3127.0   | 3127.0   | 2682.8  | 2493.1  | 1360.0  | 6192.3  | 1917.5  |
| Bbr_0739 |       | 1742.1  | 1683.0  | 1413.7  | 1420.2  | 852.7    | 165.1   | 1087.0   | 362.6    | 1229.0  | 2317.7  | 1288.6  | 1326.1  | 1268.9  |
| Bbr_0740 |       | 940.7   | 909.9   | 768.2   | 731.7   | 450.0    | 126.3   | 517.5    | 263.8    | 1064.2  | 2205.4  | 1017.7  | 1012.8  | 793.0   |
| Bbr_0741 |       | 942.7   | 857.0   | 804.0   | 810.6   | 788.0    | 828.2   | 993.8    | 1765.7   | 810.4   | 1889.1  | 663.1   | 414.6   | 833.7   |
| Bbr_0742 |       | 904.8   | 827.8   | 788.8   | 753.6   | 1002.7   | 914.4   | 1002.7   | 1310.2   | 1061.0  | 2442.0  | 431.9   | 890.6   | 829.1   |
| Bbr_0743 |       | 317.4   | 326.1   | 273.3   | 316.6   | 157.0    | 489.3   | 183.0    | 396.7    | 722.3   | 1399.2  | 176.0   | 549.4   | 304.8   |
| Bbr_0744 |       | 1611.1  | 1381.4  | 1451.1  | 1481.1  | 1800.0   | 1616.9  | 1616.9   | 1708.0   | 202.6   | 1170.7  | 141.9   | 1659.9  | 1708.9  |
| Bbr_0745 |       | 7149.6  | 5922.1  | 6155.9  | 4178.3  | 9007.5   | 2340.5  | 9007.5   | 7276.4   | 4424.6  | 3656.5  | 5931.9  | 4241.8  | 6797.4  |
| Bbr_0746 | glgB  | 3480.7  | 2430.6  | 3150.0  | 915.6   | 2592.5   | 246.2   | 3337.9   | 746.1    | 1768.3  | 1728.7  | 3934.3  | 2498.3  | 3044.0  |
| Bbr_0747 |       | 2200.5  | 2749.1  | 1934.5  | 3443.7  | 6973.6   | 9379.9  | 1789.7   | 1572.8   | 2012.8  | 2012.8  | 1581.2  | 1659.2  | 1844.0  |
| Bbr_0748 | ispF  | 993.1   | 1306.6  | 878.0   | 2185.0  | 887.6    | 3505.2  | 954.3    | 2654.1   | 991.8   | 1441.6  | 778.2   | 1016.0  | 913.8   |
| Bbr_0749 |       | 1383.4  | 1601.5  | 1242.2  | 1710.7  | 710.4    | 273.8   | 880.2    | 347.9    | 1065.3  | 627.1   | 1511.4  | 876.0   | 1132.1  |
| Bbr_0750 |       | 1970.4  | 2440.5  | 1786.3  | 2683.0  | 1439.9   | 327.4   | 1928.7   | 296.2    | 1283.2  | 700.6   | 1866.8  | 1064.7  | 1712.5  |
| Bbr_0751 |       | 1977.9  | 1749.0  | 1749.0  | 1141.0  | 1587.9   | 1141.0  | 2035.6   | 707.6    | 2035.6  | 2859.7  | 1006.0  |         |         |

|          |       |         |         |         |         |          |         |          |         |         |         |         |         |          |
|----------|-------|---------|---------|---------|---------|----------|---------|----------|---------|---------|---------|---------|---------|----------|
| Bbr_0753 | rrsA  | 14059.4 | 13072.8 | 16426.7 | 11469.4 | 10887.5  | 2360.1  | 10055.4  | 2502.9  | 15819.2 | 14414.2 | 34340.8 | 15553.3 | 16931.5  |
| Bbr_0754 | coaE  | 486.4   | 419.4   | 241.2   | 340.1   | 275.7    | 214.9   | 207.5    | 207.5   | 433.4   | 942.8   | 588.2   | 224.7   | 405.3    |
| Bbr_0755 | uvrB  | 614.5   | 577.6   | 518.6   | 398.0   | 405.9    | 67.3    | 505.6    | 226.3   | 764.8   | 1289.2  | 654.4   | 207.9   | 577.3    |
| Bbr_0756 | terC  | 2139.4  | 2286.9  | 1971.4  | 2071.7  | 1739.4   | 500.7   | 2136.3   | 320.7   | 2135.4  | 3067.8  | 2291.9  | 815.2   | 2069.0   |
| Bbr_0757 | pyk   | 9050.9  | 7695.5  | 8622.1  | 7053.1  | 6799.5   | 2333.2  | 6555.2   | 2454.0  | 5757.4  | 5100.8  | 9423.0  | 5891.1  | 7787.9   |
| Bbr_0758 | aspA  | 14225.0 | 11687.5 | 13074.0 | 9598.0  | 11054.7  | 5498.6  | 4798.4   | 4798.4  | 6901.6  | 10188.8 | 8642.9  | 10188.8 | 10493.4  |
| Bbr_0759 |       | 4879.5  | 4164.9  | 4216.4  | 2965.6  | 2965.6   | 5090.4  | 2512.1   | 1605.9  | 2964.0  | 4063.0  | 3365.1  | 4821.1  | 3528.7   |
| Bbr_0760 | polA  | 1475.3  | 1096.4  | 1312.0  | 790.8   | 805.0    | 134.5   | 2807.2   | 7194.0  | 1293.4  | 1195.0  | 1416.1  | 1501.8  | 1518.2   |
| Bbr_0761 |       | 1482.8  | 1581.3  | 1373.1  | 1338.0  | 707.5    | 397.6   | 767.8    | 389.5   | 1463.3  | 2633.3  | 624.9   | 1390.5  | 1069.9   |
| Bbr_0762 |       | 1642.1  | 1883.2  | 1614.0  | 1737.2  | 1341.5   | 806.8   | 1532.3   | 1930.0  | 1438.2  | 2554.0  | 740.6   | 940.1   | 1384.8   |
| Bbr_0763 | glgX1 | 2272.7  | 2213.0  | 2036.9  | 1468.7  | 1127.0   | 229.5   | 1247.0   | 168.1   | 1368.5  | 1943.0  | 1203.7  | 760.0   | 1542.6   |
| Bbr_0764 |       | 1222.6  | 1180.1  | 1060.7  | 1089.6  | 1204.2   | 231.2   | 1738.4   | 664.2   | 1652.7  | 1961.3  | 720.1   | 830.6   | 1266.4   |
| Bbr_0765 |       | 2616.5  | 770.0   | 2266.5  | 384.8   | 1597.9   | 524.1   | 1816.6   | 1490.6  | 673.7   | 1441.8  | 543.3   | 396.3   | 1599.1   |
| Bbr_0766 | aspA  | 3330.5  | 959.9   | 2948.9  | 472.5   | 2305.8   | 430.0   | 2930.5   | 1001.3  | 2789.5  | 5213.5  | 650.1   | 389.1   | 2492.2   |
| Bbr_0768 |       | 93.1    | 70.0    | 71.8    | 54.7    | 56.9     | 166.2   | 66.2     | 268.7   | 743.0   | 422.7   | 80.6    | 310.3   | 185.3    |
| Bbr_0769 |       | 508.7   | 691.5   | 419.3   | 559.2   | 399.1    | 261.7   | 496.6    | 343.7   | 769.6   | 852.3   | 231.5   | 142.4   | 470.8    |
| Bbr_0770 | aroA  | 403.9   | 501.8   | 303.8   | 473.4   | 276.7    | 237.7   | 316.5    | 339.4   | 577.7   | 773.5   | 370.8   | 244.7   | 374.9    |
| Bbr_0771 | ack   | 11927.8 | 11905.3 | 11662.4 | 9569.0  | 7453.4   | 3352.1  | 6754.4   | 1216.8  | 11883.2 | 8934.7  | 16663.0 | 8901.4  | 11057.4  |
| Bbr_0772 | pta   | 3551.3  | 2348.3  | 3490.0  | 854.1   | 3877.6   | 1131.7  | 4074.5   | 926.4   | 1153.0  | 1413.5  | 2159.5  | 1510.3  | 3051.0   |
| Bbr_0773 | prsA  | 8351.6  | 8496.3  | 7660.3  | 8205.8  | 9790.9   | 10518.5 | 9262.3   | 13373.1 | 11132.9 | 18319.5 | 7633.4  | 5406.0  | 8971.9   |
| Bbr_0774 |       | 655.4   | 1331.4  | 554.2   | 1751.0  | 401.2    | 543.9   | 534.4    | 402.4   | 1148.2  | 1973.3  | 830.0   | 556.7   | 688.7    |
| Bbr_0775 | guaA2 | 3982.5  | 4807.2  | 5633.1  | 4535.4  | 3013.0   | 1658.7  | 3510.3   | 1169.6  | 3910.6  | 3190.9  | 4833.4  | 4271.9  | 3802.2   |
| Bbr_0776 |       | 47246.1 | 39040.1 | 56275.7 | 36119.8 | 56141.0  | 5936.3  | 58507.1  | 7114.5  | 31987.2 | 20325.0 | 60579.1 | 33353.1 | 51789.4  |
| Bbr_0777 | glmJ  | 1965.3  | 1968.8  | 1698.0  | 2063.6  | 1287.2   | 1122.4  | 1370.0   | 1665.7  | 2112.4  | 2137.9  | 2928.7  | 2230.1  | 1893.6   |
| Bbr_0778 |       | 791.9   | 858.4   | 765.2   | 986.0   | 517.1    | 189.5   | 694.3    | 170.3   | 871.2   | 1530.9  | 1518.0  | 1199.7  | 859.6    |
| Bbr_0779 |       | 1050.4  | 1189.5  | 913.3   | 1184.1  | 611.8    | 258.0   | 707.0    | 285.5   | 1120.9  | 1586.6  | 1663.9  | 1237.2  | 1011.2   |
| Bbr_0780 |       | 295.8   | 384.5   | 246.3   | 413.3   | 177.6    | 346.9   | 225.3    | 256.6   | 796.1   | 1396.2  | 204.5   | 72.6    | 324.2    |
| Bbr_0781 |       | 376.7   | 446.7   | 345.9   | 445.4   | 287.1    | 345.8   | 287.1    | 413.5   | 397.1   | 1017.7  | 347.0   | 1017.7  | 627.9    |
| Bbr_0782 |       | 235.3   | 269.7   | 221.3   | 213.7   | 205.5    | 226.5   | 306.9    | 677.5   | 621.2   | 876.6   | 461.9   | 1132.9  | 325.4    |
| Bbr_0783 |       | 134.9   | 187.4   | 106.1   | 131.9   | 78.2     | 150.0   | 216.3    | 150.0   | 599.0   | 618.7   | 198.5   | 311.4   | 237.0    |
| Bbr_0784 |       | 1180.4  | 1219.4  | 936.3   | 997.5   | 683.9    | 649.0   | 855.2    | 861.5   | 468.9   | 1075.9  | 540.5   | 276.0   | 777.5    |
| Bbr_0785 | nadE  | 1230.0  | 1268.2  | 1051.7  | 1118.8  | 1391.7   | 468.9   | 1391.7   | 1032.9  | 1583.5  | 2659.5  | 1169.0  | 688.8   | 1260.7   |
| Bbr_0786 |       | 1840.9  | 1897.9  | 1593.6  | 1347.2  | 1735.0   | 335.0   | 1364.5   | 470.8   | 1596.4  | 1934.0  | 1596.7  | 698.8   | 1621.2   |
| Bbr_0787 | pfl   | 87980.8 | 28648.7 | 97861.3 | 8437.0  | 199019.1 | 4816.2  | 204988.4 | 14762.4 | 36316.9 | 19521.7 | 73881.4 | 24476.1 | 116676.3 |
| Bbr_0788 | pflA1 | 27115.2 | 16003.9 | 15300.7 | 16003.9 | 14043.9  | 2534.5  | 1690.6   | 325.4   | 367.0   | 1643.3  | 354.1   | 704.4   | 1837.0   |
| Bbr_0789 |       | 2039.6  | 1882.9  | 1635.5  | 990.9   | 1586.1   | 445.9   | 2011.3   | 2975.2  | 1859.8  | 2427.2  | 1407.0  | 693.1   | 1756.6   |
| Bbr_0790 |       | 1889.5  | 2398.4  | 1655.3  | 3106.1  | 2204.9   | 3762.9  | 2345.0   | 10399.4 | 2983.7  | 3109.0  | 2018.4  | 1902.4  | 2182.8   |
| Bbr_0791 | tig   | 4768.2  | 4893.0  | 4514.7  | 6381.8  | 3550.9   | 8964.8  | 3243.7   | 6038.7  | 6779.2  | 9602.6  | 7996.5  | 5517.7  | 5142.2   |
| Bbr_0792 |       | 551.9   | 597.8   | 473.7   | 760.4   | 329.8    | 1304.9  | 329.8    | 415.2   | 581.7   | 957.4   | 392.0   | 497.1   | 441.1    |
| Bbr_0793 |       | 364.0   | 438.0   | 291.7   | 482.6   | 247.7    | 744.1   | 303.3    | 465.2   | 530.3   | 945.0   | 358.5   | 407.2   | 349.3    |
| Bbr_0794 | clp1  | 20954.5 | 19996.9 | 21905.4 | 25782.2 | 32202.5  | 23679.2 | 30776.6  | 20453.7 | 11772.5 | 39845.0 | 8217.4  | 3687.4  | 20971.5  |
| Bbr_0795 | clpP2 | 11770.2 | 11026.1 | 11026.1 | 11026.1 | 13070.7  | 9404.8  | 16905.4  | 4963.2  | 7659.5  | 25167.5 | 6790.1  | 4396.1  | 12593.4  |
| Bbr_0796 | clpX  | 1640.4  | 1640.4  | 1332.7  | 1844.7  | 917.4    | 2169.3  | 1075.8   | 1591.8  | 2388.7  | 4016.1  | 1395.0  | 2266.6  | 1458.3   |
| Bbr_0797 | metC2 | 749.7   | 935.6   | 621.4   | 666.4   | 460.6    | 1302.4  | 505.8    | 833.1   | 1930.2  | 896.3   | 1488.0  | 14067.7 | 959.4    |
| Bbr_0798 | nhaA  | 942.5   | 1089.7  | 683.3   | 1384.3  | 1000.1   | 985.6   | 914.3    | 387.9   | 911.1   | 3629.9  | 374.6   | 874.5   | 804.3    |
| Bbr_0799 |       | 1654.9  | 1216.2  | 1311.7  | 722.3   | 855.7    | 536.3   | 997.5    | 497.1   | 1147.2  | 1991.2  | 722.2   | 1602.4  | 1114.8   |
| Bbr_0800 | salC  | 989.7   | 993.4   | 879.5   | 818.2   | 661.4    | 450.6   | 855.1    | 746.2   | 1454.0  | 1416.4  | 945.2   | 402.6   | 964.1    |
| Bbr_0801 | sdhB  | 2200.8  | 2458.9  | 2009.4  | 2325.0  | 3179.2   | 2359.4  | 2846.6   | 2835.2  | 1525.5  | 2375.2  | 1376.7  | 607.7   | 2189.7   |
| Bbr_0802 | sdhA  | 1038.0  | 1233.9  | 914.8   | 1092.0  | 1377.8   | 237.1   | 1246.6   | 784.4   | 1148.7  | 1767.7  | 1114.7  | 549.7   | 1140.1   |
| Bbr_0803 |       | 52.3    | 61.9    | 37.1    | 58.8    | 37.1     | 23.5    | 83.5     | 180.4   | 505.2   | 282.3   | 43.7    | 21.3    | 129.2    |
| Bbr_0804 |       | 62.7    | 76.9    | 43.3    | 47.9    | 53.2     | 45.7    | 68.6     | 435.6   | 597.2   | 228.8   | 39.0    | 26.2    | 144.0    |
| Bbr_0805 |       | 127.7   | 129.7   | 78.2    | 78.7    | 74.7     | 93.6    | 92.1     | 168.1   | 448.1   | 465.3   | 120.2   | 66.2    | 156.8    |
| Bbr_0806 |       | 2593.3  | 2100.5  | 2488.8  | 1537.9  | 2374.2   | 317.0   | 2160.6   | 666.9   | 1270.9  | 816.9   | 2665.2  | 418.1   | 2258.8   |
| Bbr_0807 | metY  | 1868.6  | 2280.6  | 1528.1  | 1842.7  | 1169.4   | 600.2   | 1408.3   | 1003.2  | 1030.5  | 1081.7  | 1287.8  | 620.1   | 1382.1   |
| Bbr_0808 |       | 5251.0  | 6009.4  | 5773.7  | 7755.5  | 7886.2   | 2438.6  | 7886.2   | 5067.7  | 3730.7  | 2467.3  | 5598.0  | 3469.7  | 6215.3   |
| Bbr_0809 |       | 2616.6  | 3358.5  | 2446.0  | 4328.4  | 1222.9   | 601.9   | 1278.1   | 625.2   | 2023.3  | 2339.2  | 5031.9  | 3291.5  | 2436.4   |
| Bbr_0810 |       | 3828.6  | 5598.7  | 2810.1  | 2945.0  | 1553.9   | 545.3   | 1759.0   | 438.1   | 1985.9  | 1544.1  | 4083.4  | 1130.5  | 2670.3   |
| Bbr_0811 |       | 435.0   | 398.7   | 377.2   | 322.4   | 469.6    | 41.9    | 525.6    | 240.7   | 685.1   | 1455.4  | 485.3   | 296.3   | 496.3    |
| Bbr_0812 | pap   | 1470.7  | 1369.6  | 1306.3  | 872.1   | 677.7    | 163.9   | 779.5    | 227.2   | 955.9   | 1171.1  | 1427.0  | 749.9   | 1102.8   |
| Bbr_0813 | proC  | 2202.1  | 1756.7  | 1979.5  | 1542.6  | 2162.5   | 1106.2  | 2372.5   | 3242.6  | 1297.7  | 1817.5  | 1635.6  | 1123.3  | 1941.6   |
| Bbr_0814 | glnH  | 840.3   | 929.5   | 773.2   | 884.7   | 411.2    | 454.9   | 448.8    | 271.1   | 1755.7  | 3777.3  | 1750.4  | 2479.2  | 996.6    |
| Bbr_0815 | glnQ  | 396.8   | 534.3   | 357.5   | 685.3   | 446.8    | 446.3   | 468.8    | 208.2   | 673.8   | 2485.7  | 465.8   | 1701.9  | 467.3    |
| Bbr_0816 | glnP1 | 295.8   | 376.9   | 263.1   | 495.8   | 187.0    | 406.9   | 265.2    | 199.1   | 600.2   | 2047.6  | 337.7   | 1118.6  | 324.8    |
| Bbr_0817 | glnP2 | 407.2   | 472.9   | 342.6   | 407.3   | 373.3    | 744.7   | 457.8    | 344.2   | 1499.8  | 3650.7  | 805.5   | 3192.1  | 816.3    |
| Bbr_0818 |       | 1775.7  | 2516.7  | 1683.4  | 2589.9  | 723.8    | 265.1   | 984.2    | 321.1   | 796.9   | 1448.7  | 1028.5  | 1165.4  | 1165.4   |
| Bbr_0819 |       | 4252.1  | 3900.3  | 4005.7  | 5006.4  | 7714.1   | 17397.5 | 7006.8   | 12289.5 | 3579.7  | 6207.1  | 3424.7  | 31331.2 | 4997.2   |
| Bbr_0820 |       | 5678.4  | 5399.7  | 5360.5  | 6516.8  | 4532.7   | 12879.4 | 3385.8   | 2057.9  | 5014.4  | 2176.2  | 22304.2 | 3865.3  | 3432.3   |
| Bbr_0821 |       | 285.4   | 387.2   | 227.0   | 416.6   | 276.7    | 605.1   | 318.5    | 651.5   | 732.8   | 923.2   | 218.6   | 1132.8  | 343.2    |
| Bbr_0822 | dirC  | 1143.3  | 955.6   | 942.8   | 963.4   | 632.5    | 2385.4  | 661.1    | 2410.7  | 1548.0  | 2086.1  | 1555.9  | 864.1   | 965.3    |
| Bbr_0823 |       | 166.4   | 198.3   | 135.9   | 184.1   | 111.4    | 192.3   | 138.1    | 131.4   | 545.8   | 810.3   | 116.7   | 622.8   | 202.4    |
| Bbr_0824 |       | 193.6   | 261.0   | 178.8   | 232.4   | 106.8    | 178.3   | 106.8    | 161.2   | 361.2   | 118.6   | 164.5   | 97.6    | 191.4    |
| Bbr_0825 |       | 1060.1  | 880.0   | 828.4   | 1089.9  | 589.5    | 1089.9  | 568.4    | 550.0   | 1102.9  | 1058.3  | 492.3   | 83.3    | 773.6    |
| Bbr_0826 |       | 182.5   | 145.7   | 144.0   | 86.3    | 106.5    | 121.2   | 139.0    | 247.5   | 831.4   | 975.3   | 586.3   | 472.3   | 331.6    |
| Bbr_0827 |       | 6421.2  | 5036.2  | 6024.9  | 5228.0  | 7648.6   | 6182.2  | 7010.7   | 6909.9  | 2902.1  | 12875.6 | 2400.6  | 1072.7  | 5401.3   |
| Bbr_0828 |       | 975.0   | 1024.6  | 886.1   | 1107.7  | 580.1    | 2106.8  | 602.8    | 1666.4  | 1053.8  | 2724.5  | 869.2   | 5038.2  | 827.8    |
| Bbr_0829 |       | 1101.5  | 1130.8  | 825.0   | 1028.8  | 654.9    | 2973.3  | 660.0    | 3460.1  | 776.3   | 2442.7  | 582.1   | 3424.8  | 766.6    |
| Bbr_0830 |       | 852.2   | 784.9   | 745.0   | 764.3   | 789.4    | 1721.7  | 833.3    | 2588.1  | 818.4   | 3637.0  | 448.7   | 1707.5  | 748.0    |
| Bbr_0831 |       | 193.9   | 201.1   | 138.1   | 193.9   | 138.1    | 172.0   | 187.7    |         |         |         |         |         |          |

|          |         |         |         |         |         |         |         |         |         |         |         |         |         |
|----------|---------|---------|---------|---------|---------|---------|---------|---------|---------|---------|---------|---------|---------|
| Bbr_0836 | 1761.2  | 1538.8  | 1305.4  | 1071.6  | 1402.6  | 1333.6  | 1332.0  | 1334.4  | 1657.6  | 812.0   | 1347.5  | 1143.5  | 1467.7  |
| Bbr_0837 | 39.6    | 41.0    | 25.7    | 43.0    | 29.4    | 70.6    | 40.3    | 260.6   | 258.5   | 9.7     | 258.5   | 29.5    | 68.2    |
| Bbr_0838 | 306.3   | 319.5   | 380.7   | 634.9   | 380.2   | 659.8   | 453.9   | 889.5   | 482.2   | 516.0   | 148.9   | 602.6   | 358.7   |
| Bbr_0839 | 409.5   | 395.2   | 466.2   | 275.2   | 466.2   | 99.1    | 531.1   | 622.4   | 550.7   | 529.8   | 268.7   | 106.9   | 430.6   |
| Bbr_0840 | 155.4   | 163.2   | 116.5   | 118.0   | 126.0   | 195.8   | 174.2   | 569.7   | 477.4   | 492.8   | 121.5   | 125.7   | 195.2   |
| Bbr_0841 | 113.9   | 165.5   | 85.0    | 113.9   | 60.1    | 144.0   | 111.3   | 314.0   | 547.5   | 430.5   | 152.4   | 290.4   | 181.7   |
| Bbr_0842 | 135.9   | 180.1   | 123.1   | 138.1   | 88.0    | 75.0    | 122.5   | 149.2   | 411.9   | 319.0   | 144.5   | 75.4    | 171.0   |
| Bbr_0843 | 1040.4  | 837.7   | 843.2   | 435.8   | 508.9   | 833.8   | 516.9   | 1256.1  | 479.9   | 1222.7  | 957.4   | 223.5   | 724.5   |
| Bbr_0844 | 1873.9  | 1655.1  | 1464.7  | 1335.5  | 1036.8  | 2816.5  | 1028.7  | 2156.5  | 2688.0  | 4914.1  | 1654.3  | 1248.8  | 1624.4  |
| Bbr_0845 | 6095.8  | 4486.8  | 5557.6  | 2966.7  | 4109.6  | 2495.4  | 3881.5  | 1825.2  | 9734.1  | 7916.6  | 3061.4  | 4091.4  | 5406.7  |
| Bbr_0846 | 819.0   | 768.5   | 649.0   | 859.3   | 427.0   | 2647.9  | 436.8   | 1865.9  | 622.1   | 1964.0  | 571.0   | 632.8   | 587.5   |
| Bbr_0847 | 790.2   | 695.0   | 706.1   | 849.2   | 567.7   | 2429.5  | 651.3   | 3291.3  | 544.0   | 1314.5  | 534.6   | 700.5   | 632.3   |
| Bbr_0848 | 1853.8  | 1801.0  | 1617.0  | 2469.0  | 1745.4  | 7180.8  | 6734.5  | 8723.5  | 557.2   | 1824.0  | 679.5   | 1339.5  | 1297.9  |
| Bbr_0849 | 384.3   | 412.1   | 345.7   | 642.0   | 283.4   | 4251.0  | 281.6   | 8436.4  | 311.5   | 1446.8  | 273.7   | 1104.6  | 313.4   |
| Bbr_0850 | 368.6   | 414.1   | 276.1   | 526.8   | 499.6   | 3245.3  | 436.7   | 5949.5  | 589.5   | 1028.0  | 144.5   | 366.9   | 385.8   |
| Bbr_0851 | 1748.3  | 1399.2  | 1617.1  | 1049.7  | 2292.8  | 9953.6  | 1433.3  | 1395.1  | 555.9   | 485.9   | 848.6   | 696.6   | 1416.0  |
| Bbr_0852 | 1406.8  | 1294.6  | 1218.1  | 1111.7  | 1430.3  | 5690.0  | 1327.2  | 1319.3  | 869.5   | 853.9   | 1614.6  | 1417.8  | 1311.1  |
| Bbr_0853 | 1289.8  | 1329.3  | 1146.4  | 1259.9  | 704.5   | 4025.3  | 645.0   | 457.3   | 1212.9  | 1673.3  | 2008.3  | 1340.8  | 1167.8  |
| Bbr_0854 | 618.6   | 519.1   | 563.2   | 562.0   | 452.6   | 2056.4  | 500.1   | 790.9   | 963.4   | 1126.0  | 835.1   | 854.4   | 655.5   |
| Bbr_0855 | 298.9   | 254.8   | 259.4   | 287.0   | 227.4   | 582.6   | 255.8   | 585.9   | 408.3   | 709.2   | 189.9   | 231.0   | 273.3   |
| Bbr_0856 | 47.0    | 44.6    | 42.3    | 46.1    | 46.1    | 143.3   | 66.8    | 122.9   | 342.8   | 786.4   | 33.3    | 85.2    | 96.4    |
| Bbr_0857 | 4508.3  | 4825.7  | 4099.6  | 3551.0  | 4418.1  | 3409.3  | 4292.2  | 3129.7  | 4217.3  | 6701.4  | 3996.1  | 2712.3  | 4255.3  |
| Bbr_0858 | 44.3    | 53.0    | 31.7    | 56.3    | 54.2    | 104.0   | 75.1    | 267.9   | 635.7   | 1085.1  | 22.9    | 78.1    | 144.0   |
| Bbr_0859 | 559.1   | 570.3   | 436.6   | 489.1   | 294.7   | 635.6   | 328.9   | 905.1   | 1083.0  | 1944.6  | 863.9   | 1115.8  | 594.4   |
| Bbr_0860 | 1083.6  | 1019.9  | 862.4   | 860.5   | 759.3   | 2319.1  | 859.0   | 3696.8  | 1596.5  | 3203.5  | 1235.1  | 1602.9  | 1066.0  |
| Bbr_0861 | 764.4   | 723.1   | 608.5   | 632.2   | 380.0   | 1414.8  | 429.0   | 966.5   | 1426.4  | 2395.3  | 957.1   | 1133.7  | 760.9   |
| Bbr_0862 | 2195.7  | 1956.7  | 1783.5  | 1229.8  | 1157.0  | 970.3   | 1121.3  | 804.7   | 1504.5  | 1920.9  | 2345.8  | 1570.3  | 1684.6  |
| Bbr_0863 | 547.7   | 411.8   | 498.2   | 527.7   | 461.9   | 4882.2  | 3653.0  | 470.9   | 3645.9  | 1128.8  | 1721.6  | 1263.3  | 631.3   |
| Bbr_0864 | 307.0   | 399.2   | 222.6   | 281.2   | 211.8   | 152.5   | 302.7   | 209.6   | 1172.2  | 948.9   | 158.2   | 81.6    | 395.8   |
| Bbr_0865 | 1201.7  | 928.5   | 979.1   | 532.8   | 599.4   | 442.3   | 621.7   | 646.3   | 1393.3  | 1241.4  | 1083.5  | 815.5   | 979.8   |
| Bbr_0866 | 679.1   | 492.9   | 534.3   | 263.1   | 406.2   | 200.2   | 498.0   | 480.7   | 842.6   | 931.9   | 699.8   | 610.0   | 109.8   |
| Bbr_0867 | 467.3   | 392.5   | 362.6   | 212.3   | 344.5   | 80.2    | 446.4   | 179.6   | 1136.0  | 955.8   | 394.6   | 147.1   | 525.2   |
| Bbr_0868 | 419.6   | 351.2   | 344.9   | 228.7   | 243.3   | 147.9   | 341.4   | 311.2   | 943.8   | 1093.4  | 497.1   | 191.5   | 465.0   |
| Bbr_0869 | 30.8    | 28.8    | 20.8    | 27.8    | 23.0    | 21.9    | 33.7    | 39.5    | 539.6   | 271.7   | 10.7    | 104.1   | 109.8   |
| Bbr_0870 | 746.8   | 734.1   | 734.1   | 461.5   | 404.1   | 511.0   | 404.1   | 275.6   | 1585.2  | 751.9   | 203.6   | 203.6   | 321.3   |
| Bbr_0871 | 341.0   | 274.0   | 280.4   | 132.7   | 167.4   | 111.5   | 202.3   | 301.3   | 908.9   | 1555.3  | 460.0   | 245.1   | 393.3   |
| Bbr_0872 | 312.1   | 222.3   | 239.8   | 59.4    | 209.6   | 42.1    | 268.4   | 85.4    | 529.0   | 515.2   | 356.5   | 228.7   | 319.2   |
| Bbr_0873 | 241.7   | 196.2   | 206.3   | 110.0   | 199.7   | 95.9    | 286.8   | 165.3   | 265.0   | 582.6   | 132.7   | 141.2   | 222.0   |
| Bbr_0874 | 138.4   | 154.0   | 107.8   | 178.2   | 137.3   | 730.7   | 167.4   | 1650.4  | 351.1   | 738.0   | 108.8   | 482.2   | 168.5   |
| Bbr_0875 | 437.7   | 404.5   | 323.9   | 424.4   | 929.6   | 1773.9  | 318.5   | 507.8   | 1773.9  | 1289.8  | 286.3   | 240.0   | 356.0   |
| Bbr_0876 | 2035.6  | 2407.6  | 1648.6  | 3067.1  | 1397.4  | 6374.5  | 1216.8  | 5596.5  | 1031.4  | 4483.0  | 651.5   | 534.6   | 1336.9  |
| Bbr_0877 | 785.0   | 806.4   | 690.9   | 801.6   | 590.9   | 473.6   | 726.5   | 660.6   | 656.7   | 1192.0  | 426.4   | 432.0   | 631.3   |
| Bbr_0878 | 934.6   | 1220.4  | 743.9   | 1231.0  | 1016.5  | 1016.5  | 618.3   | 980.6   | 1223.2  | 1544.7  | 575.1   | 926.5   | 775.5   |
| Bbr_0879 | 477.5   | 514.1   | 424.4   | 565.9   | 586.3   | 357.0   | 1180.6  | 925.3   | 1458.3  | 1458.3  | 444.4   | 444.4   | 499.6   |
| Bbr_0880 | 342.8   | 422.1   | 244.8   | 401.6   | 176.9   | 1531.6  | 179.5   | 2124.4  | 466.1   | 959.8   | 288.4   | 440.2   | 283.1   |
| Bbr_0881 | 310.7   | 404.8   | 232.6   | 374.3   | 222.8   | 1484.4  | 251.9   | 2136.2  | 613.1   | 896.1   | 301.3   | 560.0   | 322.1   |
| Bbr_0882 | 685.5   | 469.2   | 564.4   | 243.0   | 365.7   | 113.1   | 464.3   | 138.2   | 428.1   | 402.7   | 978.5   | 497.1   | 581.1   |
| Bbr_0883 | 622.3   | 445.6   | 616.3   | 310.7   | 310.7   | 160.8   | 424.7   | 190.2   | 165.6   | 322.9   | 621.1   | 153.9   | 460.3   |
| Bbr_0884 | 569.3   | 1019.0  | 487.5   | 1015.0  | 295.4   | 121.5   | 393.5   | 127.1   | 709.5   | 587.4   | 452.1   | 709.6   | 527.5   |
| Bbr_0885 | 701.8   | 1074.8  | 572.4   | 927.9   | 355.4   | 692.9   | 445.2   | 1398.2  | 820.8   | 1542.4  | 1830.5  | 905.9   | 905.9   |
| Bbr_0886 | 210.8   | 307.0   | 178.0   | 272.2   | 42.3    | 115.6   | 88.0    | 38.3    | 902.0   | 597.8   | 1080.6  | 1436.0  | 429.2   |
| Bbr_0887 | 318.6   | 384.8   | 318.6   | 466.0   | 386.5   | 566.1   | 447.3   | 934.2   | 815.6   | 772.9   | 1136.1  | 1589.2  | 570.4   |
| Bbr_0888 | 35721.8 | 30905.7 | 35404.7 | 27609.4 | 34856.1 | 57599.7 | 35452.2 | 40869.5 | 23605.5 | 31951.9 | 28354.1 | 26382.4 | 32232.4 |
| Bbr_0889 | 910.1   | 989.1   | 856.4   | 1150.7  | 452.1   | 1679.5  | 531.4   | 2310.0  | 1382.0  | 2575.9  | 660.9   | 1233.7  | 798.8   |
| Bbr_0890 | 865.2   | 957.3   | 669.6   | 898.9   | 418.1   | 1586.8  | 459.7   | 869.6   | 3610.7  | 5464.9  | 552.5   | 1229.5  | 1096.0  |
| Bbr_0891 | 614.0   | 676.5   | 571.8   | 779.1   | 436.5   | 465.5   | 612.0   | 820.1   | 1963.0  | 2516.1  | 621.5   | 769.4   | 769.4   |
| Bbr_0892 | 1378.3  | 1477.3  | 1141.8  | 1261.1  | 788.2   | 1119.8  | 828.9   | 1096.1  | 2758.8  | 3587.2  | 954.5   | 1212.4  | 1308.4  |
| Bbr_0893 | 1421.5  | 1255.0  | 1236.0  | 1486.7  | 1457.5  | 1520.2  | 6975.0  | 1442.5  | 2760.4  | 1426.9  | 3864.0  | 1417.4  | 1417.4  |
| Bbr_0894 | 1054.4  | 957.8   | 927.7   | 1080.8  | 667.9   | 2757.2  | 781.6   | 4773.0  | 819.7   | 2258.9  | 1108.2  | 3030.3  | 893.3   |
| Bbr_0895 | 2560.1  | 2628.3  | 2059.4  | 1138.4  | 596.8   | 2078.8  | 1155.0  | 493.9   | 2029.8  | 3417.1  | 1459.6  | 1573.8  | 1733.7  |
| Bbr_0896 | 11537.1 | 12355.9 | 10615.4 | 9617.1  | 9012.3  | 7302.4  | 7664.3  | 5310.3  | 6271.8  | 6196.8  | 5028.8  | 4115.2  | 8355.0  |
| Bbr_0897 | 10329.0 | 10250.5 | 9136.0  | 8353.8  | 7240.5  | 4512.3  | 6439.3  | 4134.9  | 7913.9  | 7056.1  | 7960.8  | 7160.0  | 8169.9  |
| Bbr_0898 | 3718.2  | 4334.1  | 3636.8  | 4575.6  | 5338.4  | 1026.1  | 5304.2  | 2026.2  | 1354.5  | 2878.0  | 3919.3  | 3284.2  | 3878.6  |
| Bbr_0899 | 1447.4  | 1277.0  | 1237.7  | 2088.3  | 1321.3  | 1593.8  | 1593.8  | 672.5   | 330.3   | 5216.7  | 1693.7  | 1693.7  | 1361.4  |
| Bbr_0900 | 620.2   | 506.3   | 510.0   | 447.5   | 514.9   | 352.0   | 701.2   | 1176.4  | 426.6   | 638.6   | 175.0   | 89.0    | 491.3   |
| Bbr_0902 | 1886.8  | 1846.2  | 1650.1  | 1767.1  | 1741.8  | 1278.1  | 1745.7  | 1546.3  | 978.2   | 2446.6  | 1177.2  | 1123.6  | 1530.0  |
| Bbr_0903 | 930.9   | 1041.5  | 760.8   | 703.6   | 400.9   | 162.0   | 446.7   | 148.8   | 483.5   | 871.8   | 591.7   | 490.5   | 602.4   |
| Bbr_0904 | 1241.0  | 1360.3  | 1090.9  | 1008.6  | 520.7   | 214.8   | 504.3   | 274.6   | 781.1   | 972.0   | 831.0   | 700.4   | 828.2   |
| Bbr_0905 | 9766.8  | 9464.4  | 9508.3  | 8763.7  | 5881.1  | 1961.3  | 5442.4  | 2172.6  | 5447.9  | 5416.5  | 6234.2  | 6097.7  | 7046.8  |
| Bbr_0906 | 1776.1  | 2085.5  | 1531.3  | 2196.3  | 1511.3  | 1131.3  | 1599.7  | 459.1   | 459.1   | 2332.7  | 1629.3  | 1629.3  | 1634.5  |
| Bbr_0907 | 8371.0  | 8837.7  | 7408.8  | 8773.8  | 5843.3  | 7234.4  | 4418.0  | 3396.5  | 5762.2  | 18259.3 | 3899.2  | 2013.8  | 5950.4  |
| Bbr_0908 | 4766.9  | 4910.3  | 4809.0  | 6081.4  | 5325.7  | 1263.3  | 5806.2  | 1078.3  | 3702.4  | 8213.5  | 4125.9  | 2416.8  | 4759.4  |
| Bbr_0909 | 6152.3  | 6220.9  | 5657.0  | 6425.1  | 5328.3  | 1348.6  | 5766.3  | 993.7   | 4743.9  | 10392.1 | 4800.1  | 3233.1  | 5408.0  |
| Bbr_0910 | 2102.4  | 2181.5  | 1749.9  | 2498.1  | 1988.5  | 713.7   | 2034.7  | 1496.8  | 1730.1  | 5259.0  | 1651.9  | 1286.3  | 1876.3  |
| Bbr_0911 | 9609.7  | 10402.3 | 9347.9  | 11404.4 | 15852.2 | 11710.5 | 15267.0 | 22925.9 | 10349.2 | 16997.8 | 10067.2 | 11748.9 | 11748.9 |
| Bbr_0912 | 5643.3  | 5981.1  | 4539.3  | 5679.3  | 4177.1  | 5526.4  | 3481.1  | 3663.4  | 6954.9  | 11010.9 | 5229.0  | 3288.4  | 5003.6  |
| Bbr_0913 | 2895.5  | 1936.5  | 1706.5  | 2354.1  | 1706.5  | 450.1   | 2024.5  | 233.3   | 480.1   | 2967.1  | 1936.5  | 2380.1  | 2380.1  |
| Bbr_0914 | 661.6   | 703.8   | 608.9   | 902.7   | 809.6   | 1222.9  | 776.3   | 935.1   | 843.2   | 821.5   | 745.7   | 7668.9  | 740.9   |

|          |        |         |         |         |         |          |         |          |          |         |         |         |         |
|----------|--------|---------|---------|---------|---------|----------|---------|----------|----------|---------|---------|---------|---------|
| Bbr_0915 | 547.5  | 474.3   | 423.7   | 388.1   | 368.4   | 233.4    | 497.3   | 437.4    | 593.6    | 1388.9  | 489.4   | 1306.2  | 486.7   |
| Bbr_0916 | 7424.5 | 7382.5  | 6828.0  | 7650.5  | 4771.8  | 7558.3   | 3715.8  | 1995.7   | 5464.5   | 11798.8 | 4418.3  | 3294.6  | 5437.1  |
| Bbr_0917 | 1795.9 | 1885.3  | 1571.8  | 2559.7  | 794.0   | 895.3    | 834.1   | 389.3    | 2559.9   | 5116.4  | 1679.5  | 2081.2  | 1539.2  |
| Bbr_0918 | 1009.9 | 1141.1  | 883.2   | 1548.2  | 718.5   | 798.5    | 798.5   | 214.9    | 1092.1   | 2498.1  | 1093.5  | 924.0   | 932.6   |
| Bbr_0919 | 1086.8 | 1151.0  | 888.3   | 1435.3  | 521.0   | 116.2    | 675.7   | 166.8    | 1688.4   | 3051.5  | 1349.9  | 807.1   | 1035.0  |
| Bbr_0920 | 890.2  | 920.5   | 852.0   | 1159.6  | 798.6   | 206.8    | 798.6   | 383.3    | 873.6    | 1016.9  | 2076.2  | 529.0   | 921.2   |
| Bbr_0921 | 7203.7 | 6198.4  | 6690.9  | 4082.9  | 5332.5  | 2166.2   | 5287.6  | 1107.7   | 7160.3   | 8033.8  | 9214.7  | 5462.4  | 6814.9  |
| Bbr_0922 | pntA1  | 5399.5  | 3610.3  | 5116.4  | 1819.9  | 3279.1   | 865.4   | 3792.4   | 1977.4   | 2763.3  | 2554.8  | 5629.6  | 2567.5  |
| Bbr_0923 | pntA   | 3572.4  | 2556.8  | 3689.9  | 1572.1  | 2530.9   | 477.1   | 3746.0   | 2135.7   | 1317.8  | 1734.1  | 3398.5  | 3393.3  |
| Bbr_0924 | pntB   | 6664.4  | 5250.1  | 6249.7  | 3275.2  | 4013.3   | 1337.5  | 4110.8   | 1725.3   | 2667.5  | 2597.7  | 6245.3  | 5592.3  |
| Bbr_0925 | rpIV   | 775.5   | 856.8   | 696.5   | 771.1   | 502.0    | 880.6   | 1638.2   | 526.7    | 2208.2  | 1129.2  | 487.5   | 796.6   |
| Bbr_0926 | rpIV   | 25333.6 | 30572.8 | 26132.9 | 32152.5 | 33201.5  | 69126.8 | 48296.1  | 102641.7 | 10147.9 | 5160.9  | 18349.4 | 27148.8 |
| Bbr_0927 | ilvE   | 2405.2  | 2770.1  | 2130.4  | 2264.3  | 1857.9   | 3666.6  | 2045.5   | 1931.5   | 1397.5  | 1319.7  | 2420.7  | 2586.1  |
| Bbr_0928 | fadD2  | 783.7   | 978.1   | 786.7   | 1051.2  | 602.9    | 1385.0  | 618.8    | 1582.4   | 435.9   | 676.2   | 641.7   | 833.3   |
| Bbr_0929 | rspsT  | 330.7   | 373.3   | 314.4   | 385.1   | 263.7    | 316.7   | 391.8    | 180.5    | 466.4   | 858.2   | 359.8   | 354.5   |
| Bbr_0930 | lepA   | 6235.4  | 5358.5  | 5360.4  | 5179.4  | 4273.6   | 7282.1  | 3680.6   | 8842.4   | 7730.2  | 11592.8 | 7842.6  | 3851.9  |
| Bbr_0931 | hemN   | 1452.9  | 1758.7  | 1398.1  | 2131.3  | 1429.5   | 714.0   | 1184.5   | 339.1    | 1639.7  | 4368.2  | 1397.6  | 820.6   |
| Bbr_0932 | hemN   | 287.7   | 311.9   | 166.3   | 422.4   | 84.4     | 250.2   | 92.2     | 722.6    | 1340.4  | 1340.4  | 146.0   | 1417.0  |
| Bbr_0933 |        | 55.1    | 66.3    | 30.6    | 55.8    | 20.6     | 29.0    | 26.2     | 38.4     | 154.3   | 1350.7  | 24.2    | 51.9    |
| Bbr_0934 |        | 320.7   | 257.9   | 256.1   | 135.6   | 166.6    | 87.5    | 241.7    | 203.6    | 677.1   | 1731.0  | 381.5   | 343.9   |
| Bbr_0935 | glIB   | 658.5   | 486.0   | 373.5   | 360.7   | 353.3    | 468.5   | 362.6    | 800.9    | 358.7   | 725.5   | 334.3   | 408.9   |
| Bbr_0936 | glID   | 1478.5  | 2193.8  | 1411.7  | 1916.5  | 1016.6   | 229.6   | 1488.3   | 484.9    | 1220.0  | 1415.2  | 1346.0  | 1328.8  |
| Bbr_0937 |        | 1750.1  | 2810.2  | 1561.6  | 1998.0  | 1670.0   | 287.0   | 1721.0   | 758.1    | 621.2   | 998.5   | 916.5   | 702.7   |
| Bbr_0938 |        | 33.0    | 26.2    | 39.2    | 20.8    | 43.4     | 45.4    | 60.5     | 361.1    | 267.9   | 480.6   | 33.8    | 79.6    |
| Bbr_0939 |        | 3959.7  | 4078.7  | 3784.3  | 2346.8  | 3747.5   | 618.0   | 4288.8   | 1381.1   | 1711.4  | 1456.1  | 2892.6  | 3397.4  |
| Bbr_0940 |        | 1080.7  | 1036.0  | 997.3   | 586.0   | 537.5    | 652.3   | 459.3    | 1487.0   | 1155.4  | 1269.7  | 1704.9  | 1004.1  |
| Bbr_0941 |        | 2326.3  | 2160.3  | 1952.8  | 1772.7  | 1556.3   | 3949.6  | 6480.9   | 3007.9   | 5929.1  | 2147.0  | 1885.8  | 2091.8  |
| Bbr_0942 |        | 5653.0  | 5724.5  | 4747.4  | 3389.7  | 3381.1   | 4714.7  | 3389.7   | 2846.0   | 2846.0  | 2846.0  | 1833.1  | 3048.9  |
| Bbr_0943 |        | 2154.9  | 2030.2  | 1715.1  | 1147.6  | 1215.0   | 843.6   | 1521.9   | 529.5    | 1409.4  | 1619.3  | 1051.5  | 1511.3  |
| Bbr_0944 |        | 799.4   | 984.8   | 678.8   | 710.8   | 439.1    | 390.9   | 495.9    | 486.8    | 1188.4  | 1376.1  | 576.0   | 696.3   |
| Bbr_0945 |        | 3574.9  | 3517.2  | 3333.6  | 3832.7  | 4675.2   | 7859.9  | 4471.7   | 21061.7  | 3303.7  | 7866.2  | 1650.9  | 3501.7  |
| Bbr_0946 |        | 3450.8  | 3387.7  | 3096.6  | 3821.2  | 2421.9   | 7718.2  | 2285.7   | 9026.2   | 3053.2  | 7081.0  | 1357.0  | 2610.9  |
| Bbr_0947 | bcp    | 841.4   | 821.6   | 701.5   | 859.7   | 406.0    | 1279.7  | 415.4    | 768.9    | 720.7   | 2158.7  | 535.1   | 1134.7  |
| Bbr_0948 |        | 4085.6  | 3576.7  | 4014.6  | 1882.4  | 2319.4   | 898.3   | 2530.9   | 694.3    | 938.9   | 1207.0  | 1788.3  | 92.3    |
| Bbr_0949 |        | 19.4    | 24.2    | 13.4    | 24.2    | 13.4     | 58.5    | 30.9     | 134.5    | 104.3   | 416.1   | 10.3    | 97.0    |
| Bbr_0953 |        | 975.2   | 1140.5  | 931.9   | 972.7   | 804.2    | 509.3   | 1097.8   | 377.8    | 1178.0  | 2238.9  | 993.5   | 2294.1  |
| Bbr_0954 |        | 996.3   | 1054.5  | 834.3   | 731.5   | 476.5    | 638.0   | 523.2    | 140.8    | 1402.0  | 2404.0  | 868.0   | 2664.4  |
| Bbr_0955 |        | 1091.1  | 808.4   | 948.5   | 754.5   | 732.3    | 721.9   | 940.3    | 701.0    | 1829.0  | 2424.9  | 1018.1  | 2097.0  |
| Bbr_0956 |        | 732.3   | 548.7   | 647.7   | 646.3   | 922.1    | 646.3   | 922.1    | 1955.8   | 1102.6  | 1622.8  | 530.0   | 1228.8  |
| Bbr_0957 | rarD   | 133.3   | 152.7   | 97.5    | 118.5   | 103.4    | 335.9   | 103.3    | 554.6    | 642.3   | 695.9   | 51.8    | 152.8   |
| Bbr_0958 |        | 662.9   | 478.8   | 519.3   | 265.5   | 296.5    | 312.5   | 344.5    | 384.5    | 783.8   | 2233.1  | 381.5   | 622.0   |
| Bbr_0959 |        | 759.5   | 420.7   | 469.6   | 615.6   | 469.6    | 915.4   | 547.9    | 781.4    | 1166.6  | 1166.6  | 567.6   | 699.1   |
| Bbr_0960 |        | 385.7   | 371.7   | 357.8   | 428.8   | 248.2    | 874.0   | 303.6    | 844.4    | 1440.3  | 1225.3  | 236.4   | 497.5   |
| Bbr_0961 |        | 159.3   | 168.2   | 116.0   | 108.1   | 95.4     | 95.0    | 126.0    | 121.9    | 352.9   | 320.4   | 64.2    | 152.3   |
| Bbr_0962 |        | 152.5   | 159.3   | 113.0   | 97.2    | 100.0    | 28.3    | 141.0    | 88.6     | 384.1   | 248.8   | 96.5    | 71.4    |
| Bbr_0963 |        | 297.0   | 255.7   | 233.8   | 190.7   | 233.8    | 224.7   | 322.0    | 365.6    | 356.4   | 491.4   | 186.0   | 272.4   |
| Bbr_0964 | tenA   | 84.0    | 132.7   | 81.5    | 167.4   | 53.7     | 284.7   | 69.6     | 135.5    | 212.5   | 381.0   | 135.1   | 104.8   |
| Bbr_0965 |        | 229.4   | 312.1   | 176.5   | 342.5   | 164.7    | 539.7   | 199.6    | 508.4    | 526.2   | 546.8   | 223.3   | 172.0   |
| Bbr_0966 |        | 343.6   | 364.3   | 314.8   | 253.2   | 155.2    | 220.2   | 207.3    | 125.0    | 356.6   | 1003.9  | 190.3   | 159.3   |
| Bbr_0967 |        | 366.3   | 392.8   | 325.9   | 407.2   | 273.2    | 248.5   | 354.6    | 455.7    | 620.0   | 646.6   | 780.2   | 431.1   |
| Bbr_0968 |        | 1817.4  | 1817.2  | 1561.6  | 1605.7  | 1946.7   | 2668.4  | 1785.4   | 6683.9   | 1572.6  | 2283.8  | 1440.8  | 1687.4  |
| Bbr_0969 | metE   | 827.9   | 1557.9  | 761.1   | 1507.6  | 417.6    | 394.2   | 498.5    | 238.5    | 777.2   | 1250.9  | 1822.4  | 1238.8  |
| Bbr_0970 | metF   | 385.4   | 638.7   | 222.1   | 513.6   | 345.7    | 116.0   | 152.6    | 152.6    | 715.8   | 1053.9  | 721.5   | 411.9   |
| Bbr_0971 | cbh    | 52652.7 | 38631.0 | 69143.5 | 39049.2 | 116912.9 | 40063.8 | 138340.6 | 38833.8  | 21853.4 | 77388.8 | 11314.4 | 8417.2  |
| Bbr_0972 | glnE   | 2270.7  | 2166.8  | 2042.1  | 3011.1  | 1870.9   | 1324.5  | 2094.7   | 953.0    | 1235.1  | 2592.4  | 1061.6  | 1254.7  |
| Bbr_0973 | pyrB   | 6043.9  | 6112.9  | 5422.9  | 3053.0  | 6666.2   | 1269.5  | 5533.7   | 6436.2   | 8259.8  | 5054.3  | 4974.3  | 1673.0  |
| Bbr_0974 | pyrI   | 7310.3  | 6786.6  | 6489.5  | 6025.2  | 6025.2   | 653.6   | 5389.1   | 1148.0   | 6038.5  | 2524.9  | 5732.8  | 1895.4  |
| Bbr_0975 | pyrC   | 3493.4  | 2783.8  | 2683.1  | 1303.3  | 1848.7   | 181.8   | 2031.6   | 431.7    | 2805.8  | 1678.8  | 3177.4  | 1365.6  |
| Bbr_0976 | pyrF1  | 4619.2  | 3473.9  | 3913.9  | 2004.3  | 1995.6   | 341.3   | 2056.6   | 557.3    | 5170.0  | 2263.2  | 4777.8  | 3001.2  |
| Bbr_0977 | pyrK   | 2462.0  | 2202.5  | 2269.7  | 1709.1  | 1150.0   | 536.3   | 1242.6   | 522.8    | 2145.8  | 2478.9  | 2469.2  | 1875.3  |
| Bbr_0978 | pyrD1  | 1265.3  | 1239.2  | 1211.6  | 957.6   | 618.3    | 183.3   | 676.6    | 182.3    | 1325.7  | 1950.1  | 1797.1  | 1458.9  |
| Bbr_0979 | pyrE2  | 3342.9  | 3373.4  | 2657.1  | 2420.1  | 1938.1   | 1938.1  | 1635.6   | 1838.3   | 4293.5  | 4787.1  | 4235.2  | 2778.7  |
| Bbr_0980 |        | 551.3   | 511.6   | 439.8   | 244.6   | 403.9    | 203.1   | 513.8    | 897.5    | 442.2   | 918.9   | 365.6   | 517.9   |
| Bbr_0981 |        | 1409.8  | 1429.7  | 1179.8  | 1429.7  | 1179.8   | 1299.3  | 1031.9   | 351.2    | 7119.8  | 2252.8  | 1176.8  | 689.6   |
| Bbr_0982 |        | 1535.2  | 1394.5  | 1180.0  | 1630.1  | 873.7    | 1630.1  | 920.9    | 2433.9   | 1181.4  | 3739.6  | 653.0   | 498.6   |
| Bbr_0983 |        | 4563.0  | 3796.4  | 3949.9  | 2920.9  | 3063.9   | 5722.9  | 2642.1   | 2775.1   | 1543.6  | 8837.8  | 1050.7  | 679.4   |
| Bbr_0984 |        | 1046.8  | 1320.6  | 917.7   | 1249.5  | 539.3    | 773.0   | 550.7    | 385.3    | 2051.9  | 3341.5  | 1241.4  | 711.2   |
| Bbr_0985 |        | 493.4   | 499.2   | 401.7   | 360.5   | 338.3    | 232.4   | 475.3    | 218.3    | 963.4   | 1581.9  | 756.9   | 393.1   |
| Bbr_0986 |        | 58.5    | 77.4    | 38.2    | 63.4    | 49.6     | 55.1    | 67.8     | 214.4    | 741.7   | 914.2   | 45.0    | 413.7   |
| Bbr_0988 |        | 7855.4  | 7590.5  | 6604.0  | 4563.5  | 5666.8   | 2403.7  | 5508.0   | 4261.0   | 4386.0  | 6159.6  | 4401.2  | 4065.8  |
| Bbr_0989 | uvrA2  | 1291.3  | 1291.3  | 1291.3  | 1291.3  | 1291.3   | 1291.3  | 1291.3   | 1291.3   | 1291.3  | 1291.3  | 1291.3  | 1291.3  |
| Bbr_0990 | uvrC   | 325.8   | 343.0   | 324.7   | 502.2   | 417.3    | 253.7   | 445.0    | 1125.7   | 601.4   | 1685.2  | 334.5   | 391.5   |
| Bbr_0991 | aroE   | 1096.4  | 1017.9  | 1003.9  | 932.5   | 1019.6   | 860.5   | 923.9    | 2585.9   | 1682.0  | 3147.9  | 1059.0  | 761.0   |
| Bbr_0992 |        | 1333.1  | 1310.9  | 839.8   | 869.7   | 1046.5   | 251.1   | 1046.5   | 210.5    | 1765.6  | 2347.8  | 1206.1  | 1218.2  |
| Bbr_0993 |        | 2875.8  | 4271.9  | 2493.2  | 4164.0  | 1833.3   | 7522.4  | 1632.4   | 6903.2   | 2058.6  | 3255.0  | 2390.7  | 2214.0  |
| Bbr_0994 | pgk    | 12772.8 | 12281.8 | 12997.1 | 10435.3 | 15102.8  | 9465.5  | 10851.4  | 8051.1   | 10130.8 | 14031.7 | 15198.5 | 12842.2 |
| Bbr_0995 | tpi    | 2969.7  | 3155.8  | 2776.3  | 2394.3  | 2001.8   | 3572.3  | 1937.1   | 1525.5   | 1218.0  | 3216.4  | 1698.0  | 2133.5  |
| Bbr_0996 | secD   | 2575.3  | 2575.3  | 2439.6  | 2439.6  | 2439.6   | 2439.6  | 2439.6   | 2439.6   | 2439.6  | 2439.6  | 2439.6  | 2439.6  |
| Bbr_0997 | ldh1   | 1702.5  | 1609.6  | 1410.8  | 1195.2  | 1003.3   | 776.7   | 1353.4   | 401.8    | 1249.6  | 725.9   | 1401.3  | 1355.0  |

|          |       |         |         |         |         |         |         |         |          |         |         |         |         |         |
|----------|-------|---------|---------|---------|---------|---------|---------|---------|----------|---------|---------|---------|---------|---------|
| Bbr_0998 |       | 983.1   | 939.3   | 877.3   | 789.6   | 667.3   | 351.6   | 929.9   | 193.6    | 870.5   | 535.5   | 1239.5  | 961.6   | 927.9   |
| Bbr_0999 |       | 354.1   | 331.1   | 244.5   | 382.5   | 361.2   | 480.6   | 361.2   | 176.3    | 582.3   | 357.1   | 1134.4  | 656.9   | 421.7   |
| Bbr_1000 |       | 808.7   | 963.5   | 632.1   | 478.7   | 749.7   | 337.3   | 937.0   | 616.9    | 1062.5  | 493.6   | 437.9   | 325.0   | 771.3   |
| Bbr_1001 |       | 464.1   | 482.3   | 511.6   | 343.8   | 591.4   | 235.1   | 591.4   | 153.0    | 672.3   | 710.7   | 362.8   | 439.0   | 497.3   |
| Bbr_1002 | tal   | 32038.4 | 24247.5 | 35692.3 | 20518.9 | 30889.8 | 5106.3  | 29758.5 | 5846.6   | 25082.2 | 20288.9 | 48128.9 | 30144.6 | 33598.4 |
| Bbr_1003 | hlcA  | 16194.5 | 15479.2 | 16992.9 | 15779.2 | 32876.2 | 4316.0  | 7047.7  | 4316.0   | 14429.3 | 14429.3 | 18676.6 | 21315.3 | 19563.5 |
| Bbr_1004 | hrcA  | 1658.4  | 3394.6  | 1586.9  | 839.3   | 1876.7  | 19633.4 | 1485.4  | 1876.7   | 2502.9  | 4333.3  | 970.5   | 6794.0  | 1680.1  |
| Bbr_1005 | dnaJ2 | 1908.7  | 2496.9  | 1802.0  | 4296.9  | 1466.1  | 2341.9  | 1587.4  | 358.7    | 1144.1  | 4368.4  | 811.0   | 1214.8  | 1453.2  |
| Bbr_1006 |       | 717.8   | 738.5   | 608.9   | 549.2   | 723.5   | 1153.1  | 843.8   | 1451.8   | 797.4   | 1479.4  | 471.5   | 1026.0  | 693.8   |
| Bbr_1007 | bacA  | 1556.4  | 1579.6  | 1329.2  | 1142.4  | 1339.6  | 375.9   | 1551.2  | 338.8    | 1969.6  | 1603.3  | 3031.9  | 2043.4  | 1796.3  |
| Bbr_1009 | thrS  | 4146.8  | 4667.3  | 3763.0  | 3646.5  | 3779.9  | 672.7   | 4237.9  | 706.6    | 1972.9  | 1653.7  | 4747.1  | 3030.4  | 3774.6  |
| Bbr_1010 |       | 4452.3  | 4808.9  | 4145.2  | 4075.4  | 3041.6  | 725.4   | 3041.6  | 717.3    | 3412.0  | 2012.6  | 6058.6  | 4421.8  | 3990.5  |
| Bbr_1011 |       | 6134.7  | 6571.7  | 5817.3  | 8140.1  | 11821.6 | 4834.3  | 11646.4 | 5203.7   | 6359.8  | 6076.8  | 8551.0  | 5436.2  | 8388.5  |
| Bbr_1012 | ruvC  | 2295.6  | 2297.5  | 2018.1  | 2716.1  | 2264.3  | 2315.4  | 2547.9  | 1470.1   | 1621.2  | 2209.0  | 2244.5  | 2234.0  | 2165.3  |
| Bbr_1013 | ruvA  | 863.4   | 950.6   | 845.5   | 1761.5  | 1197.4  | 4870.9  | 1204.3  | 8743.0   | 1308.7  | 3442.1  | 1032.3  | 1575.0  | 1075.3  |
| Bbr_1014 | ruvB  | 1353.9  | 1395.2  | 1181.4  | 904.0   | 1037.3  | 2226.2  | 1037.3  | 409.3    | 1122.2  | 2659.2  | 1195.5  | 1246.0  | 1132.4  |
| Bbr_1015 | YajC  | 7113.1  | 7500.2  | 7215.9  | 8703.2  | 9161.1  | 5664.5  | 7017.3  | 3232.7   | 5218.1  | 5186.1  | 5887.3  | 2118.9  | 6935.5  |
| Bbr_1016 | apt   | 6940.0  | 7323.9  | 6643.1  | 7631.3  | 5124.1  | 4237.0  | 5020.6  | 2211.4   | 6093.6  | 5210.3  | 7246.1  | 2884.1  | 6177.9  |
| Bbr_1017 | sucC  | 3949.5  | 4278.4  | 4094.1  | 5232.6  | 2405.2  | 1528.5  | 2428.6  | 871.9    | 3692.2  | 2962.4  | 5249.0  | 2567.7  | 3636.4  |
| Bbr_1018 | sucD  | 5065.7  | 5673.4  | 4788.6  | 6291.6  | 5017.2  | 1338.1  | 5576.1  | 1167.0   | 3959.0  | 2745.7  | 5277.8  | 2719.6  | 4886.7  |
| Bbr_1019 |       | 4215.6  | 4129.1  | 3765.6  | 3342.5  | 3168.3  | 1533.7  | 4163.5  | 3146.3   | 4314.4  | 5017.8  | 5297.3  | 2977.0  | 4154.1  |
| Bbr_1020 | purH  | 3058.3  | 3090.1  | 3051.3  | 2550.0  | 1547.3  | 1180.5  | 1529.1  | 1383.6   | 2226.8  | 3824.9  | 4182.9  | 2953.8  | 2593.3  |
| Bbr_1021 |       | 3459.1  | 3273.2  | 3003.8  | 2873.5  | 2044.3  | 930.3   | 2204.8  | 1162.9   | 4146.1  | 3246.6  | 4131.3  | 2540.5  | 3164.9  |
| Bbr_1022 | rluB  | 1184.5  | 1537.6  | 1052.4  | 2042.8  | 1304.6  | 5011.3  | 1017.3  | 11400.4  | 1536.9  | 4906.0  | 1192.4  | 2930.8  | 1214.7  |
| Bbr_1023 |       | 410.8   | 524.3   | 333.3   | 727.0   | 262.8   | 486.7   | 340.7   | 196.4    | 395.7   | 1815.0  | 636.4   | 624.0   | 396.6   |
| Bbr_1024 |       | 215.2   | 250.6   | 180.2   | 260.6   | 269.2   | 859.8   | 241.4   | 532.2    | 283.3   | 446.1   | 201.7   | 990.1   | 265.2   |
| Bbr_1025 | ugpA  | 2569.4  | 2527.4  | 2325.5  | 1105.0  | 1963.3  | 269.1   | 2498.3  | 747.9    | 463.5   | 1573.0  | 2398.4  | 757.4   | 2336.4  |
| Bbr_1026 |       | 3702.6  | 3718.7  | 3264.5  | 3702.6  | 2564.3  | 3218.4  | 2734.4  | 2535.0   | 4920.2  | 3067.6  | 6427.0  | 3376.2  | 4154.1  |
| Bbr_1027 |       | 4874.0  | 3842.9  | 4146.8  | 3334.7  | 2589.4  | 1377.6  | 2385.9  | 497.4    | 3743.6  | 4941.8  | 2903.9  | 2006.4  | 3440.6  |
| Bbr_1028 | helY  | 1130.5  | 1144.5  | 940.6   | 1006.0  | 692.1   | 181.1   | 949.5   | 481.8    | 1560.4  | 2055.1  | 1055.1  | 977.1   | 1054.7  |
| Bbr_1029 |       | 2749.2  | 4145.3  | 2720.4  | 6260.8  | 2492.6  | 34499.7 | 2566.0  | 214705.6 | 2162.0  | 7660.6  | 1880.4  | 1007.4  | 2428.4  |
| Bbr_1030 |       | 281.2   | 472.7   | 262.0   | 497.6   | 317.7   | 3589.1  | 317.7   | 17897.4  | 459.7   | 1318.3  | 289.8   | 150.5   | 306.1   |
| Bbr_1031 |       | 371.9   | 607.9   | 293.2   | 657.7   | 373.4   | 3737.4  | 211.2   | 4385.6   | 359.2   | 1096.1  | 207.7   | 113.5   | 276.8   |
| Bbr_1032 |       | 212.0   | 263.6   | 170.1   | 310.4   | 169.4   | 376.7   | 214.0   | 812.2    | 460.3   | 697.2   | 135.3   | 2454.7  | 226.9   |
| Bbr_1033 |       | 2331.2  | 2491.9  | 1925.1  | 2491.9  | 1568.3  | 2136.6  | 1731.4  | 2136.6   | 2136.6  | 4696.1  | 15000.4 | 2198.2  | 4154.1  |
| Bbr_1034 | garA  | 3245.8  | 3628.1  | 2887.5  | 3218.9  | 1608.5  | 1108.7  | 1648.1  | 835.6    | 2484.5  | 3322.3  | 2006.9  | 2493.3  | 2313.6  |
| Bbr_1035 |       | 1474.6  | 1670.1  | 1117.3  | 1282.6  | 744.8   | 360.3   | 835.2   | 282.1    | 1832.7  | 1419.5  | 1223.4  | 809.6   | 1204.7  |
| Bbr_1036 |       | 2047.4  | 2304.7  | 1714.5  | 2147.8  | 2867.6  | 1472.6  | 3190.6  | 3436.9   | 1289.3  | 1589.6  | 1102.2  | 602.7   | 2035.3  |
| Bbr_1037 |       | 1253.4  | 1495.8  | 1073.7  | 1489.3  | 693.4   | 116.0   | 851.2   | 1464.6   | 1417.9  | 1417.9  | 1211.7  | 1132.1  | 1091.3  |
| Bbr_1038 | pgsA1 | 2098.5  | 2522.4  | 2055.5  | 2719.6  | 1623.6  | 744.3   | 1925.8  | 1825.3   | 1287.2  | 2247.9  | 1999.9  | 1530.7  | 1831.7  |
| Bbr_1039 | hisG  | 4605.9  | 7049.6  | 3991.2  | 4523.6  | 4074.6  | 742.0   | 3849.9  | 1521.6   | 3290.3  | 3627.8  | 3869.7  | 2457.7  | 3946.9  |
| Bbr_1040 | hisE  | 4478.7  | 4650.4  | 5376.8  | 4660.4  | 2677.9  | 965.6   | 3112.1  | 963.7    | 5466.2  | 5466.2  | 3466.4  | 4184.5  | 4184.5  |
| Bbr_1041 | rpe1  | 5462.8  | 7238.4  | 5214.6  | 6763.3  | 3879.8  | 1437.9  | 4083.9  | 1152.9   | 5489.6  | 5886.5  | 4874.1  | 2312.5  | 4834.1  |
| Bbr_1042 | lgt   | 2167.1  | 3076.4  | 1465.7  | 1930.1  | 1074.6  | 771.5   | 1201.0  | 1159.8   | 1984.1  | 1551.7  | 1501.4  | 1024.3  | 1565.7  |
| Bbr_1043 | trpA  | 1979.4  | 2560.6  | 1823.6  | 1889.1  | 1483.1  | 419.6   | 1928.2  | 660.3    | 1552.5  | 1666.0  | 2000.8  | 1044.4  | 1794.6  |
| Bbr_1044 | trpBC | 1742.3  | 2180.7  | 1579.2  | 1730.6  | 1544.6  | 480.8   | 1766.0  | 762.6    | 846.1   | 1245.4  | 1402.7  | 774.8   | 1480.2  |
| Bbr_1045 |       | 318.1   | 286.7   | 275.0   | 258.8   | 161.1   | 252.6   | 199.1   | 479.4    | 720.3   | 1035.9  | 202.9   | 264.2   | 312.8   |
| Bbr_1046 | nfo   | 920.0   | 1036.5  | 826.3   | 1376.2  | 871.5   | 6644.6  | 1012.0  | 20484.3  | 1257.3  | 6391.5  | 473.0   | 912.8   | 893.3   |
| Bbr_1047 | aap2  | 862.5   | 1096.1  | 660.2   | 1061.6  | 470.8   | 939.2   | 476.6   | 1462.1   | 1462.1  | 1681.0  | 608.8   | 544.2   | 760.2   |
| Bbr_1048 | rpe1  | 53.9    | 55.1    | 46.4    | 58.8    | 66.5    | 113.6   | 72.7    | 270.9    | 557.3   | 514.0   | 23.9    | 133.8   | 136.8   |
| Bbr_1049 |       | 85.7    | 88.9    | 82.3    | 72.1    | 79.3    | 78.5    | 142.8   | 180.2    | 401.3   | 468.3   | 125.7   | 151.0   | 152.8   |
| Bbr_1050 |       | 221.2   | 154.0   | 189.5   | 130.7   | 219.0   | 60.3    | 272.1   | 185.6    | 636.3   | 854.1   | 359.4   | 414.3   | 316.3   |
| Bbr_1051 |       | 1484.5  | 1206.3  | 1279.4  | 1022.0  | 1425.6  | 275.7   | 1251.3  | 254.9    | 1007.7  | 1131.0  | 911.5   | 824.8   | 1226.7  |
| Bbr_1052 |       | 883.1   | 713.6   | 739.3   | 587.4   | 450.7   | 587.4   | 505.2   | 517.1    | 1031.9  | 1988.7  | 871.6   | 1235.7  | 747.0   |
| Bbr_1053 |       | 583.8   | 587.5   | 475.9   | 463.3   | 663.1   | 82.0    | 636.2   | 149.6    | 620.7   | 906.7   | 303.5   | 120.1   | 547.2   |
| Bbr_1054 |       | 758.4   | 650.0   | 702.9   | 715.8   | 593.7   | 411.1   | 785.1   | 276.1    | 405.8   | 1647.7  | 155.9   | 41.1    | 547.2   |
| Bbr_1055 |       | 3384.5  | 3626.6  | 2950.8  | 3167.0  | 2783.3  | 1816.0  | 2783.4  | 2254.7   | 3719.2  | 2989.6  | 3810.2  | 3181.8  | 3238.4  |
| Bbr_1056 |       | 928.4   | 912.7   | 672.8   | 570.9   | 730.8   | 650.9   | 730.8   | 2837.7   | 709.6   | 1341.9  | 450.6   | 1378.6  | 691.3   |
| Bbr_1057 |       | 615.4   | 902.2   | 500.2   | 716.7   | 360.6   | 224.7   | 433.5   | 776.3    | 771.8   | 801.6   | 524.2   | 835.1   | 534.3   |
| Bbr_1058 |       | 251.7   | 223.9   | 209.6   | 255.5   | 185.5   | 5493.3  | 254.8   | 28278.0  | 710.1   | 1272.0  | 174.8   | 7655.7  | 297.7   |
| Bbr_1059 |       | 27.5    | 26.9    | 20.2    | 21.2    | 41.3    | 133.4   | 51.8    | 671.7    | 336.9   | 347.8   | 99.2    | 2541.1  | 96.1    |
| Bbr_1060 |       | 60.1    | 41.3    | 38.4    | 41.3    | 61.3    | 53.2    | 42.1    | 95.2     | 220.3   | 302.0   | 56.9    | 47.7    | 80.3    |
| Bbr_1061 |       | 79.6    | 96.4    | 58.4    | 73.9    | 53.2    | 71.4    | 65.8    | 138.9    | 362.4   | 334.1   | 41.1    | 37.7    | 110.1   |
| Bbr_1062 |       | 167.2   | 168.2   | 102.8   | 118.0   | 153.0   | 178.9   | 153.0   | 963.7    | 5406.6  | 5406.6  | 167.4   | 167.4   | 187.0   |
| Bbr_1063 |       | 196.4   | 168.8   | 160.3   | 121.0   | 148.7   | 148.0   | 208.4   | 506.4    | 465.9   | 157.7   | 157.7   | 222.9   | 222.9   |
| Bbr_1064 |       | 160.1   | 142.4   | 140.9   | 117.0   | 121.5   | 141.6   | 138.2   | 302.7    | 372.5   | 438.6   | 139.3   | 76.5    | 178.8   |
| Bbr_1065 |       | 100.9   | 88.4    | 72.2    | 56.4    | 61.7    | 63.2    | 77.6    | 100.4    | 614.6   | 524.6   | 90.1    | 58.8    | 169.5   |
| Bbr_1066 |       | 719.6   | 698.0   | 657.5   | 588.4   | 656.9   | 2057.0  | 804.4   | 10106.6  | 875.5   | 1507.0  | 621.0   | 2791.9  | 722.5   |
| Bbr_1067 | yalQ  | 700.2   | 684.2   | 599.1   | 588.5   | 566.8   | 1594.7  | 689.5   | 2321.8   | 845.5   | 1561.9  | 666.9   | 3297.8  | 679.0   |
| Bbr_1068 |       | 1160.7  | 984.4   | 1071.7  | 1026.5  | 1294.0  | 1154.9  | 1312.5  | 3045.6   | 426.9   | 873.0   | 1658.8  | 1660.5  | 1154.1  |
| Bbr_1069 |       | 583.2   | 583.2   | 453.0   | 453.0   | 704.0   | 453.0   | 704.0   | 622.0    | 1234.0  | 1234.0  | 368.3   | 368.3   | 592.8   |
| Bbr_1070 |       | 2377.3  | 2013.3  | 1906.7  | 1856.3  | 2151.2  | 3214.0  | 1790.7  | 4428.8   | 1505.5  | 2314.2  | 1573.8  | 1884.2  | 1884.2  |
| Bbr_1071 |       | 212.4   | 208.7   | 195.9   | 193.2   | 196.5   | 309.1   | 247.8   | 1750.4   | 264.7   | 844.4   | 162.8   | 237.7   | 213.4   |
| Bbr_1072 |       | 660.2   | 587.4   | 607.6   | 528.1   | 357.8   | 638.9   | 394.4   | 589.9    | 629.0   | 1251.7  | 281.2   | 331.3   | 488.4   |
| Bbr_1073 |       | 891.1   | 729.4   | 662.1   | 485.7   | 594.4   | 549.7   | 699.8   | 998.4    | 991.2   | 1557.0  | 338.9   | 329.9   | 696.2   |
| Bbr_1074 |       | 671.9   | 569.5   | 544.0   | 429.3   | 455.6   | 1048.9  | 455.6   | 1425.6   | 793.3   | 2188.5  | 596.0   | 923.4   | 581.7   |
| Bbr_1075 |       | 1052.2  | 977.9   | 943.9   | 1241.1  | 688.7   | 2697.6  | 636.0   | 1940.8   | 841.1   | 2756.5  | 1112.1  | 1789.7  | 879.2   |
| Bbr_1076 |       | 1869.1  | 2083.6  | 1459.3  | 2083.6  | 1459.3  | 1459.3  | 1459.3  | 625.7    | 1631.5  | 2459.9  | 1674.4  | 1811.1  | 1702.5  |
| Bbr_1077 |       | 1643.1  |         |         |         |         |         |         |          |         |         |         |         |         |

|          |       |         |         |         |         |         |         |         |         |         |         |         |         |         |
|----------|-------|---------|---------|---------|---------|---------|---------|---------|---------|---------|---------|---------|---------|---------|
| Bbr_1078 |       | 1667.4  | 1671.0  | 1443.2  | 2174.3  | 966.8   | 3869.1  | 916.0   | 4011.0  | 1639.1  | 5401.8  | 1370.4  | 2745.5  | 1333.8  |
| Bbr_1079 |       | 180.1   | 159.0   | 147.8   | 109.9   | 114.6   | 259.3   | 154.8   | 967.3   | 728.5   | 796.4   | 161.4   | 287.7   | 247.9   |
| Bbr_1080 |       | 335.2   | 333.5   | 243.8   | 340.1   | 314.8   | 631.4   | 414.4   | 3464.2  | 550.6   | 1609.1  | 221.2   | 310.7   | 346.7   |
| Bbr_1081 |       | 230.4   | 171.7   | 207.4   | 135.3   | 363.0   | 205.8   | 324.2   | 461.3   | 336.0   | 772.4   | 198.1   | 334.8   | 276.5   |
| Bbr_1082 |       | 676.2   | 558.6   | 576.0   | 567.9   | 677.1   | 927.5   | 708.4   | 3046.8  | 529.5   | 1043.3  | 356.8   | 734.3   | 587.3   |
| Bbr_1083 |       | 1485.8  | 1191.5  | 1303.1  | 1094.1  | 1094.1  | 1599.9  | 2330.9  | 18032.1 | 942.6   | 1636.5  | 662.4   | 1716.5  | 1344.7  |
| Bbr_1084 |       | 1375.5  | 1138.4  | 1135.8  | 1033.7  | 703.7   | 1235.9  | 1683.0  | 68890.0 | 1068.5  | 915.4   | 840.8   | 3799.3  | 1233.2  |
| Bbr_1085 |       | 984.1   | 828.1   | 733.4   | 411.8   | 586.9   | 2076.8  | 645.6   | 4180.6  | 696.7   | 683.2   | 704.4   | 2771.5  | 725.2   |
| Bbr_1086 |       | 54.5    | 55.2    | 35.8    | 38.0    | 33.3    | 522.9   | 40.2    | 504.1   | 161.8   | 319.1   | 77.5    | 1217.8  | 67.2    |
| Bbr_1087 |       | 290.3   | 328.2   | 242.2   | 278.8   | 312.9   | 191.7   | 339.5   | 407.7   | 334.0   | 685.4   | 206.0   | 455.3   | 287.5   |
| Bbr_1088 |       | 459.1   | 493.4   | 382.7   | 401.5   | 383.0   | 429.7   | 516.5   | 1356.2  | 1300.6  | 976.8   | 408.6   | 718.2   | 575.1   |
| Bbr_1090 | aap3  | 214.0   | 177.0   | 201.2   | 356.2   | 114.3   | 174.0   | 137.1   | 245.2   | 455.7   | 578.9   | 526.3   | 173.1   | 274.7   |
| Bbr_1091 |       | 10.3    | 34.7    | 10.4    | 25.1    | 14.1    | 6.9     | 27.9    | 26.2    | 351.4   | 899.0   | 8.8     | 35.0    | 70.5    |
| Bbr_1092 |       | 593.2   | 715.3   | 479.4   | 635.1   | 354.8   | 934.4   | 479.6   | 6079.7  | 675.8   | 2266.4  | 425.1   | 1379.8  | 486.3   |
| Bbr_1093 |       | 370.5   | 353.3   | 296.3   | 210.6   | 180.7   | 139.4   | 214.4   | 238.3   | 599.4   | 691.5   | 281.2   | 87.0    | 323.7   |
| Bbr_1094 |       | 867.3   | 956.6   | 700.4   | 628.8   | 483.3   | 378.5   | 557.0   | 259.9   | 1179.1  | 1176.9  | 684.4   | 745.3   | 745.3   |
| Bbr_1095 |       | 193.7   | 184.9   | 177.6   | 182.1   | 173.4   | 205.5   | 231.6   | 439.3   | 616.3   | 613.7   | 144.4   | 295.9   | 256.2   |
| Bbr_1096 | trpE  | 956.2   | 1011.4  | 780.8   | 780.8   | 559.5   | 688.1   | 832.3   | 878.0   | 605.8   | 1523.7  | 607.9   | 395.4   | 745.2   |
| Bbr_1097 | hisI  | 737.7   | 865.8   | 596.5   | 665.6   | 523.6   | 418.1   | 666.9   | 660.1   | 1143.8  | 1899.0  | 817.5   | 575.4   | 747.7   |
| Bbr_1098 | hisF  | 975.8   | 1248.5  | 873.9   | 1032.8  | 873.9   | 658.1   | 633.6   | 1141.4  | 751.0   | 2280.7  | 817.4   | 889.2   | 761.9   |
| Bbr_1100 |       | 1482.2  | 1431.0  | 1135.6  | 943.4   | 847.0   | 183.6   | 1044.6  | 131.0   | 1881.1  | 1813.8  | 1490.6  | 814.9   | 1313.5  |
| Bbr_1101 | cdsA  | 3637.1  | 3789.4  | 3050.3  | 2541.9  | 3073.0  | 970.1   | 3031.7  | 730.0   | 2527.2  | 2626.1  | 2489.1  | 1035.2  | 2968.0  |
| Bbr_1102 | frr   | 10403.0 | 10463.3 | 10288.6 | 7846.1  | 6195.4  | 2898.1  | 5176.4  | 1944.2  | 5715.5  | 5280.8  | 8627.5  | 3808.7  | 7734.4  |
| Bbr_1103 | pyrH  | 8156.0  | 9258.4  | 7575.1  | 7669.5  | 6660.2  | 3604.7  | 6654.3  | 3493.2  | 4408.7  | 4218.9  | 5541.2  | 2613.8  | 6499.3  |
| Bbr_1104 | tsf   | 8518.0  | 7463.8  | 7098.2  | 6234.1  | 6778.4  | 5615.3  | 6367.4  | 5638.5  | 4361.7  | 6602.6  | 5736.8  | 5016.5  | 6476.7  |
| Bbr_1105 | tpsB  | 23291.7 | 22031.4 | 24663.7 | 25605.9 | 19582.0 | 35972.1 | 19182.9 | 38966.5 | 30990.0 | 38727.2 | 40232.5 | 32840.8 | 26323.8 |
| Bbr_1106 | def   | 1954.1  | 2036.1  | 1601.0  | 2276.4  | 939.0   | 326.6   | 978.1   | 201.1   | 2262.4  | 3783.2  | 1916.1  | 1008.1  | 1608.5  |
| Bbr_1107 | fadD3 | 3657.0  | 3702.6  | 3438.7  | 3832.4  | 3732.8  | 684.7   | 3312.6  | 363.7   | 2893.7  | 3073.0  | 1152.0  | 3348.0  | 3348.0  |
| Bbr_1108 |       | 272.0   | 202.3   | 218.1   | 195.6   | 228.3   | 317.9   | 231.8   | 519.8   | 928.9   | 920.4   | 283.2   | 319.7   | 360.4   |
| Bbr_1109 | guaC  | 3815.6  | 4514.4  | 3580.0  | 4755.4  | 2266.4  | 960.5   | 2362.0  | 936.1   | 2167.6  | 3773.5  | 3641.7  | 2972.2  | 2972.2  |
| Bbr_1110 | icdA  | 1585.2  | 1676.1  | 1492.9  | 1040.9  | 1796.0  | 254.1   | 1934.1  | 849.4   | 1878.5  | 1504.9  | 1989.6  | 746.2   | 1781.1  |
| Bbr_1111 |       | 3036.8  | 2969.2  | 2604.3  | 2458.5  | 1699.4  | 591.4   | 1699.4  | 254.7   | 3121.6  | 2195.5  | 2673.6  | 812.6   | 2438.6  |
| Bbr_1112 |       | 62.4    | 55.4    | 48.4    | 50.7    | 50.1    | 57.8    | 66.3    | 192.2   | 632.2   | 729.2   | 24.2    | 49.1    | 147.3   |
| Bbr_1113 |       | 42.7    | 35.9    | 22.6    | 21.1    | 17.1    | 11.7    | 52.1    | 58.9    | 261.4   | 207.4   | 36.8    | 39.2    | 76.8    |
| Bbr_1114 |       | 383.0   | 393.2   | 403.0   | 418.7   | 440.3   | 1100.5  | 440.3   | 394.2   | 430.2   | 437.5   | 205.0   | 208.8   | 388.6   |
| Bbr_1115 |       | 739.6   | 825.5   | 556.2   | 772.1   | 1111.3  | 2687.7  | 766.3   | 4202.7  | 1885.9  | 1046.2  | 189.5   | 312.9   | 874.8   |
| Bbr_1117 |       | 20.7    | 20.8    | 13.6    | 25.8    | 16.0    | 13.9    | 21.2    | 17.3    | 545.0   | 481.2   | 8.5     | 4.2     | 104.2   |
| Bbr_1118 |       | 1124.8  | 1089.0  | 1060.2  | 1003.9  | 494.2   | 263.3   | 618.3   | 360.9   | 2228.3  | 3043.5  | 1771.4  | 1196.3  | 1216.2  |
| Bbr_1119 |       | 3031.0  | 2961.9  | 2886.4  | 2969.6  | 2471.0  | 1422.8  | 2898.9  | 2703.3  | 3994.2  | 6134.9  | 2166.4  | 1650.9  | 2908.0  |
| Bbr_1120 |       | 1604.7  | 1306.3  | 1372.0  | 704.6   | 1185.4  | 152.1   | 1491.2  | 537.6   | 1530.5  | 1285.6  | 1727.8  | 858.3   | 1485.3  |
| Bbr_1121 | dcm   | 2052.4  | 1997.2  | 1726.6  | 1420.3  | 955.6   | 404.4   | 1017.6  | 310.0   | 1081.4  | 1467.0  | 1354.5  | 885.1   | 1364.7  |
| Bbr_1122 | topB  | 68.4    | 68.7    | 40.5    | 30.4    | 46.7    | 50.7    | 55.3    | 65.0    | 55.3    | 271.9   | 81.0    | 827.0   | 92.1    |
| Bbr_1123 | gcp   | 1639.9  | 2035.4  | 1421.4  | 1587.3  | 742.7   | 337.7   | 828.6   | 349.8   | 1608.4  | 1114.6  | 1289.5  | 840.2   | 1255.1  |
| Bbr_1124 | rml   | 1144.9  | 1408.5  | 879.9   | 1053.1  | 644.5   | 601.7   | 641.0   | 641.0   | 1158.1  | 1920.3  | 1154.2  | 1102.1  | 926.8   |
| Bbr_1125 |       | 893.1   | 1166.9  | 725.6   | 1085.8  | 502.2   | 968.0   | 560.1   | 1030.0  | 858.4   | 1681.6  | 937.7   | 860.6   | 746.2   |
| Bbr_1126 |       | 609.8   | 704.3   | 510.7   | 537.2   | 178.1   | 178.1   | 333.2   | 219.3   | 450.9   | 819.1   | 442.6   | 349.1   | 440.4   |
| Bbr_1127 |       | 810.4   | 1016.7  | 721.5   | 936.2   | 383.7   | 200.7   | 429.2   | 257.6   | 1678.4  | 1565.1  | 854.7   | 994.5   | 813.0   |
| Bbr_1128 |       | 355.9   | 347.0   | 279.6   | 410.4   | 354.3   | 1400.9  | 374.3   | 4573.7  | 859.2   | 1320.2  | 179.1   | 1065.7  | 400.4   |
| Bbr_1129 |       | 34.0    | 39.8    | 24.0    | 34.3    | 27.6    | 10.9    | 38.3    | 21.9    | 377.4   | 271.8   | 22.6    | 231.1   | 87.3    |
| Bbr_1130 | leuS  | 3523.3  | 4516.9  | 3040.4  | 3345.6  | 1845.0  | 1147.6  | 2088.5  | 1782.2  | 2479.4  | 2456.4  | 3834.0  | 3953.2  | 2801.8  |
| Bbr_1131 |       | 568.7   | 694.1   | 519.2   | 666.1   | 481.6   | 440.0   | 481.6   | 289.6   | 547.4   | 1195.0  | 530.6   | 908.6   | 514.6   |
| Bbr_1132 | corA  | 1164.3  | 1461.2  | 968.7   | 1376.0  | 889.2   | 1917.1  | 945.4   | 770.6   | 1776.5  | 2507.6  | 1938.5  | 1993.0  | 1280.4  |
| Bbr_1133 |       | 285.3   | 293.5   | 212.2   | 199.3   | 155.7   | 221.4   | 198.3   | 115.0   | 551.7   | 1024.6  | 463.4   | 493.3   | 311.1   |
| Bbr_1134 |       | 251.1   | 239.3   | 167.3   | 133.2   | 106.4   | 58.3    | 160.3   | 119.3   | 538.5   | 999.5   | 189.3   | 91.2    | 235.5   |
| Bbr_1135 |       | 18028.5 | 11944.4 | 16600.6 | 12769.7 | 19530.5 | 32773.2 | 22007.3 | 36438.8 | 21827.1 | 85431.9 | 15486.9 | 7984.5  | 18913.5 |
| Bbr_1136 |       | 249.8   | 294.9   | 198.0   | 236.1   | 215.9   | 52.7    | 299.5   | 123.1   | 335.1   | 940.5   | 202.8   | 113.3   | 250.2   |
| Bbr_1137 |       | 198.1   | 271.6   | 184.6   | 324.6   | 141.6   | 341.2   | 181.3   | 622.0   | 522.2   | 905.6   | 262.0   | 291.6   | 248.5   |
| Bbr_1138 |       | 97.6    | 88.6    | 64.1    | 79.7    | 113.0   | 100.3   | 97.9    | 629.2   | 376.1   | 558.5   | 31.3    | 38.4    | 130.0   |
| Bbr_1139 |       | 424.1   | 354.7   | 328.0   | 162.1   | 257.3   | 170.9   | 308.9   | 256.8   | 956.4   | 435.4   | 272.8   | 103.6   | 424.6   |
| Bbr_1140 |       | 1178.2  | 984.0   | 1011.7  | 337.5   | 848.1   | 287.1   | 960.3   | 359.4   | 1125.9  | 1135.5  | 1185.9  | 683.2   | 1051.7  |
| Bbr_1141 |       | 446.7   | 262.2   | 372.5   | 95.3    | 259.5   | 82.3    | 327.9   | 133.0   | 492.5   | 942.4   | 627.5   | 280.3   | 421.1   |
| Bbr_1142 |       | 109.2   | 129.0   | 98.4    | 97.7    | 79.7    | 33.0    | 113.8   | 65.5    | 345.1   | 272.2   | 167.0   | 67.2    | 152.2   |
| Bbr_1143 | agl5  | 76.0    | 72.1    | 55.3    | 49.2    | 57.8    | 136.3   | 89.4    | 443.6   | 637.2   | 344.7   | 36.8    | 86.1    | 158.7   |
| Bbr_1144 |       | 270.4   | 216.0   | 189.4   | 197.7   | 191.7   | 151.9   | 216.7   | 98.9    | 1084.9  | 1084.9  | 120.6   | 114.9   | 243.7   |
| Bbr_1145 |       | 54.5    | 52.4    | 49.4    | 38.4    | 71.5    | 56.0    | 99.2    | 121.4   | 333.1   | 341.2   | 28.1    | 29.0    | 106.0   |
| Bbr_1146 |       | 173.8   | 153.5   | 148.7   | 112.2   | 150.5   | 95.5    | 222.9   | 254.8   | 528.8   | 366.9   | 94.2    | 71.0    | 219.8   |
| Bbr_1147 |       | 173.4   | 154.5   | 153.4   | 77.5    | 120.5   | 57.0    | 170.1   | 151.5   | 591.9   | 413.1   | 73.9    | 29.4    | 213.9   |
| Bbr_1148 |       | 75.6    | 84.6    | 66.6    | 58.4    | 63.2    | 114.2   | 76.0    | 620.0   | 234.4   | 297.9   | 34.5    | 41.9    | 91.7    |
| Bbr_1149 |       | 903.0   | 860.9   | 801.1   | 881.2   | 1235.2  | 1061.6  | 1225.0  | 2980.7  | 744.8   | 724.7   | 386.2   | 217.9   | 882.5   |
| Bbr_1150 |       | 337.1   | 390.5   | 226.3   | 264.2   | 204.7   | 389.2   | 252.3   | 347.5   | 476.3   | 425.4   | 164.0   | 122.1   | 276.8   |
| Bbr_1151 |       | 160.9   | 140.3   | 127.6   | 127.6   | 153.9   | 127.6   | 153.9   | 108.7   | 591.9   | 1130.1  | 210.4   | 370.7   | 360.1   |
| Bbr_1152 |       | 868.4   | 786.1   | 706.4   | 602.8   | 631.7   | 828.6   | 631.7   | 1084.7  | 530.9   | 1633.7  | 445.0   | 537.7   | 657.9   |
| Bbr_1153 |       | 504.8   | 520.4   | 440.6   | 427.8   | 426.3   | 593.8   | 471.9   | 1017.1  | 595.6   | 1730.1  | 411.0   | 585.1   | 475.1   |
| Bbr_1154 |       | 432.0   | 435.3   | 336.2   | 402.0   | 196.6   | 1051.0  | 212.4   | 774.2   | 873.5   | 1954.8  | 385.6   | 406.1   | 406.1   |
| Bbr_1155 |       | 315.1   | 221.9   | 252.1   | 127.1   | 162.0   | 94.1    | 199.1   | 128.2   | 795.8   | 942.8   | 276.1   | 102.8   | 333.4   |
| Bbr_1156 |       | 2849.0  | 2496.0  | 2387.3  | 2269.4  | 2425.7  | 1060.0  | 2727.7  | 1602.6  | 5908.1  | 6957.0  | 1176.2  | 3953.9  | 3375.0  |
| Bbr_1157 | relA1 | 2843.7  | 2554.5  | 2144.0  | 1444.7  | 1949.1  | 172.7   | 2398.8  | 349.7   | 1718.0  | 1270.9  | 1910.4  | 628.0   | 2160.7  |
| Bbr_1158 | dut   | 11236.3 | 12242.0 | 9893.4  | 11236.3 | 6281.5  | 9893.4  | 5676.7  | 6281.5  | 5676.7  | 5362.1  | 2562.0  | 6345.2  | 7520.5  |
| Bbr_1159 |       | 8982.7  | 11437.7 | 8239.9  | 6995.5  | 5838.7  | 2412.8  | 6218.8  | 4865.5  | 4415.1  | 2416.5  | 4996.9  | 1554.3  | 6448.7  |

|          |       |         |         |         |         |         |         |         |          |         |         |         |         |         |
|----------|-------|---------|---------|---------|---------|---------|---------|---------|----------|---------|---------|---------|---------|---------|
| Bbr_1160 |       | 1941.8  | 2248.7  | 1737.4  | 2431.1  | 1111.8  | 2393.9  | 1170.6  | 3483.7   | 1221.8  | 2417.4  | 1484.4  | 722.1   | 1444.6  |
| Bbr_1161 |       | 790.8   | 755.9   | 681.6   | 735.5   | 401.7   | 761.9   | 1286.2  | 401.7    | 591.9   | 1049.0  | 455.5   | 507.5   | 703.3   |
| Bbr_1162 | gyrA2 | 524.8   | 599.8   | 456.5   | 537.6   | 264.0   | 68.1    | 302.0   | 105.1    | 337.6   | 750.7   | 603.0   | 352.4   | 414.7   |
| Bbr_1163 |       | 228.8   | 206.3   | 200.3   | 163.9   | 172.8   | 115.0   | 245.8   | 464.1    | 540.6   | 329.3   | 149.2   | 181.5   | 256.2   |
| Bbr_1164 |       | 87.2    | 79.7    | 77.1    | 63.9    | 74.4    | 56.2    | 94.6    | 380.0    | 289.3   | 188.2   | 34.1    | 46.8    | 109.3   |
| Bbr_1167 | lhr   | 125.5   | 157.2   | 110.0   | 204.8   | 78.1    | 110.4   | 88.2    | 122.0    | 557.5   | 1157.8  | 99.4    | 68.0    | 181.4   |
| Bbr_1168 | rbsK1 | 1458.2  | 1225.3  | 1130.3  | 1130.3  | 721.7   | 667.6   | 791.6   | 1170.0   | 1121.2  | 1739.9  | 1188.7  | 1548.7  | 1068.6  |
| Bbr_1169 |       | 360.2   | 267.1   | 290.7   | 197.9   | 297.6   | 334.4   | 381.8   | 2065.6   | 1032.8  | 944.4   | 409.6   | 726.4   | 462.1   |
| Bbr_1170 | gyrB2 | 1010.0  | 1086.5  | 900.0   | 1376.8  | 1324.6  | 473.4   | 1427.5  | 2226.7   | 1130.8  | 2277.3  | 931.3   | 718.3   | 1120.7  |
| Bbr_1171 |       | 3064.7  | 3495.1  | 2950.1  | 5135.9  | 3087.7  | 14395.0 | 3120.2  | 39414.9  | 3372.3  | 5683.9  | 2117.5  | 2752.3  | 2952.1  |
| Bbr_1172 |       | 22.6    | 26.9    | 19.9    | 26.8    | 22.3    | 21.5    | 28.3    | 24.6     | 529.0   | 342.8   | 16.6    | 21.8    | 106.5   |
| Bbr_1173 | idsA  | 751.4   | 722.9   | 668.2   | 741.9   | 417.0   | 417.0   | 601.3   | 616.0    | 1045.1  | 1229.9  | 640.1   | 1437.6  | 696.2   |
| Bbr_1174 | pknA2 | 1394.3  | 1566.4  | 1239.6  | 1359.5  | 1510.8  | 174.8   | 1745.6  | 231.2    | 2624.5  | 2142.6  | 1597.6  | 700.3   | 1685.4  |
| Bbr_1175 | plsCZ | 4332.1  | 4084.8  | 3823.2  | 3083.1  | 3085.9  | 1932.0  | 3165.3  | 2306.6   | 2937.2  | 2902.6  | 3719.6  | 1705.4  | 3510.5  |
| Bbr_1176 |       | 1601.8  | 1607.0  | 1218.4  | 1185.0  | 848.6   | 837.6   | 958.8   | 1185.1   | 1801.0  | 1795.8  | 1367.1  | 665.9   | 1299.3  |
| Bbr_1177 | trpD  | 1588.8  | 1755.4  | 1337.1  | 1285.7  | 1139.0  | 1974.9  | 1192.1  | 1219.5   | 884.2   | 1375.6  | 852.5   | 460.9   | 1165.6  |
| Bbr_1178 | secA  | 3279.0  | 4952.9  | 2856.6  | 5695.6  | 1915.8  | 1620.5  | 2063.7  | 779.7    | 2110.6  | 2846.4  | 3583.6  | 2730.4  | 2634.9  |
| Bbr_1179 |       | 8764.3  | 4703.8  | 8179.0  | 3066.4  | 6033.5  | 6377.4  | 5149.0  | 5798.5   | 4281.8  | 15585.6 | 7063.0  | 4321.1  | 6578.4  |
| Bbr_1180 | recX  | 531.5   | 635.4   | 444.5   | 1323.7  | 373.2   | 6354.0  | 310.8   | 3378.3   | 794.1   | 2772.9  | 427.9   | 1182.2  | 480.3   |
| Bbr_1181 | recA  | 524.0   | 636.0   | 453.0   | 1607.0  | 1005.0  | 7049.0  | 993.5   | 12769.1  | 972.6   | 4014.4  | 471.0   | 1174.6  | 736.5   |
| Bbr_1182 |       | 1186.1  | 1206.8  | 896.0   | 1406.4  | 1766.2  | 15107.9 | 3688.5  | 239431.7 | 650.1   | 2355.5  | 666.7   | 763.6   | 1470.6  |
| Bbr_1183 | clgR  | 1357.9  | 2138.1  | 1023.8  | 3877.0  | 1401.0  | 76273.8 | 1018.1  | 380303.1 | 2193.8  | 16702.7 | 616.0   | 2041.3  | 1268.4  |
| Bbr_1184 | cinA  | 874.4   | 652.0   | 740.3   | 534.0   | 800.9   | 325.8   | 990.7   | 466.5    | 764.1   | 1842.6  | 537.1   | 1287.2  | 784.6   |
| Bbr_1185 | pgsA2 | 4171.4  | 5553.3  | 2282.5  | 2001.8  | 1538.9  | 780.5   | 1762.0  | 568.4    | 3913.6  | 5403.8  | 2652.5  | 1634.4  | 2720.2  |
| Bbr_1186 | ftsK  | 689.6   | 792.8   | 590.5   | 802.9   | 363.1   | 105.1   | 523.5   | 64.2     | 932.9   | 2064.0  | 809.9   | 645.6   | 651.6   |
| Bbr_1187 | fic   | 1136.2  | 1131.2  | 1015.7  | 790.9   | 880.3   | 541.2   | 880.3   | 1166.2   | 1007.0  | 1599.4  | 836.8   | 503.1   | 988.4   |
| Bbr_1188 | miaA  | 441.5   | 493.1   | 377.1   | 474.1   | 284.8   | 160.2   | 284.8   | 104.1    | 1247.3  | 1619.7  | 523.8   | 495.5   | 518.0   |
| Bbr_1189 |       | 781.3   | 801.7   | 740.3   | 855.8   | 455.7   | 781.3   | 455.7   | 781.3    | 455.7   | 855.8   | 455.7   | 781.3   | 455.7   |
| Bbr_1190 | relA2 | 3166.9  | 3274.0  | 2873.3  | 2842.3  | 1644.8  | 1970.0  | 1627.9  | 1972.8   | 2603.5  | 2300.9  | 2050.6  | 1026.6  | 2327.8  |
| Bbr_1191 |       | 631.8   | 817.4   | 527.2   | 938.0   | 333.7   | 1434.0  | 351.4   | 196.6    | 1806.1  | 1723.4  | 309.0   | 566.6   | 659.9   |
| Bbr_1192 |       | 14241.1 | 11507.1 | 12575.7 | 9421.8  | 12680.5 | 6823.9  | 9470.9  | 7082.3   | 9220.5  | 15519.8 | 3990.3  | 2553.9  | 10363.2 |
| Bbr_1193 |       | 28.1    | 26.9    | 22.8    | 34.2    | 46.8    | 56.8    | 45.7    | 190.0    | 739.6   | 1121.1  | 11.0    | 91.2    | 149.0   |
| Bbr_1194 |       | 789.9   | 707.8   | 634.0   | 1002.0  | 1150.6  | 1793.5  | 1227.0  | 3143.9   | 1501.8  | 4422.6  | 392.7   | 336.2   | 949.3   |
| Bbr_1195 | acn   | 2103.2  | 2224.2  | 1849.0  | 1715.5  | 1848.2  | 840.2   | 1284.9  | 1260.2   | 1803.0  | 1803.0  | 1823.7  | 1788.8  | 1757.4  |
| Bbr_1196 | ctpE  | 2114.2  | 2028.7  | 1834.3  | 2028.7  | 2661.6  | 221.9   | 2133.6  | 221.9    | 2537.2  | 1525.2  | 1057.0  | 1254.2  | 1057.0  |
| Bbr_1197 |       | 1654.8  | 1183.5  | 1448.0  | 1006.3  | 985.2   | 198.8   | 1329.8  | 542.3    | 1948.3  | 1089.7  | 1520.7  | 2250.4  | 1481.1  |
| Bbr_1198 |       | 2126.3  | 1535.2  | 1972.5  | 1342.1  | 1447.6  | 273.7   | 1653.6  | 340.7    | 859.4   | 1224.0  | 1348.8  | 1161.7  | 1568.0  |
| Bbr_1199 |       | 3353.5  | 2306.0  | 3160.1  | 1595.8  | 1717.5  | 402.9   | 1773.8  | 172.2    | 1509.4  | 1404.4  | 2202.8  | 1763.4  | 2286.2  |
| Bbr_1200 | xth   | 6867.4  | 5565.7  | 5860.7  | 3240.1  | 5006.9  | 1487.3  | 5451.8  | 2123.2   | 3523.8  | 2575.5  | 3458.8  | 1811.9  | 5028.2  |
| Bbr_1201 | xth   | 403.4   | 466.3   | 350.0   | 412.5   | 245.5   | 341.2   | 245.5   | 467.8    | 747.6   | 886.4   | 373.3   | 104.6   | 389.5   |
| Bbr_1202 | oppD2 | 1951.1  | 2114.0  | 1957.1  | 2326.1  | 1585.8  | 551.8   | 1865.6  | 1135.8   | 1899.9  | 2633.7  | 3626.6  | 4138.7  | 2147.7  |
| Bbr_1203 | oppC1 | 6529.3  | 7595.2  | 8065.3  | 6082.4  | 9249.4  | 1359.4  | 9050.6  | 4235.3   | 4235.3  | 4235.3  | 7010.7  | 7256.5  | 7108.0  |
| Bbr_1204 | oppB2 | 6059.9  | 8273.0  | 6749.8  | 6478.4  | 2577.7  | 8051.7  | 2307.4  | 2207.4   | 7725.2  | 6128.3  | 6835.7  | 5000.5  | 6892.1  |
| Bbr_1205 | oppA2 | 38059.7 | 37469.5 | 46126.8 | 22960.6 | 3085.9  | 29498.9 | 7037.4  | 33521.1  | 11982.0 | 56700.4 | 37915.0 | 39423.8 | 39423.8 |
| Bbr_1206 |       | 359.8   | 392.3   | 291.1   | 338.6   | 236.0   | 63.9    | 339.7   | 70.0     | 548.4   | 993.1   | 253.5   | 192.7   | 338.1   |
| Bbr_1207 |       | 927.2   | 996.7   | 1249.5  | 1581.0  | 405.4   | 545.4   | 432.7   | 308.7    | 1289.3  | 3722.1  | 567.1   | 1356.9  | 811.9   |
| Bbr_1208 |       | 962.5   | 916.2   | 801.5   | 911.2   | 554.3   | 84.7    | 706.8   | 239.1    | 989.3   | 2305.5  | 598.5   | 311.1   | 768.8   |
| Bbr_1209 |       | 1843.1  | 1332.3  | 1725.6  | 814.8   | 1046.6  | 1237.0  | 1186.7  | 1984.6   | 947.2   | 1737.8  | 1167.4  | 1326.6  | 1319.4  |
| Bbr_1210 | tyrA2 | 1257.5  | 1159.9  | 1124.0  | 827.8   | 1143.9  | 328.5   | 1116.7  | 808.4    | 970.2   | 1531.5  | 748.0   | 1008.2  | 1069.0  |
| Bbr_1211 | pheA  | 553.7   | 539.7   | 663.7   | 1351.0  | 272.2   | 190.5   | 357.0   | 91.2     | 1164.0  | 1073.1  | 335.1   | 840.3   | 557.6   |
| Bbr_1212 |       | 1018.4  | 1042.1  | 862.7   | 1446.2  | 741.3   | 3304.0  | 733.2   | 712.2    | 1732.6  | 2641.9  | 1732.6  | 887.6   | 996.0   |
| Bbr_1213 |       | 2245.2  | 2622.8  | 2282.7  | 3715.3  | 1735.5  | 5497.2  | 1364.6  | 1370.7   | 3604.5  | 4841.9  | 3372.5  | 4333.7  | 2434.2  |
| Bbr_1214 |       | 371.4   | 336.2   | 291.3   | 267.2   | 246.4   | 385.6   | 254.2   | 170.9    | 928.3   | 872.4   | 464.2   | 381.1   | 426.0   |
| Bbr_1215 |       | 212.6   | 222.6   | 171.6   | 179.4   | 106.8   | 122.9   | 151.4   | 71.7     | 402.1   | 458.1   | 290.5   | 174.8   | 222.5   |
| Bbr_1216 |       | 156.8   | 175.1   | 134.6   | 162.9   | 138.1   | 98.4    | 180.1   | 149.8    | 376.0   | 468.0   | 231.7   | 261.8   | 202.9   |
| Bbr_1216 | iscS  | 389.5   | 502.2   | 369.5   | 702.1   | 304.1   | 331.9   | 362.6   | 446.3    | 736.2   | 1062.4  | 290.9   | 289.1   | 408.6   |
| Bbr_1219 | nadC  | 206.9   | 304.5   | 163.3   | 366.7   | 189.0   | 573.9   | 237.7   | 368.7    | 552.3   | 931.7   | 200.0   | 257.0   | 258.2   |
| Bbr_1220 | nadB  | 238.2   | 310.2   | 187.4   | 395.8   | 155.2   | 196.8   | 162.4   | 332.6    | 552.8   | 1022.6  | 194.6   | 356.3   | 248.4   |
| Bbr_1221 | nadA  | 531.0   | 672.1   | 467.3   | 859.0   | 603.7   | 3713.3  | 551.8   | 1104.3   | 628.8   | 1407.9  | 404.2   | 787.1   | 531.1   |
| Bbr_1222 |       | 248.8   | 286.3   | 462.2   | 402.3   | 8732.6  | 308.9   | 8250.6  | 467.8    | 974.4   | 974.4   | 216.9   | 877.7   | 311.9   |
| Bbr_1223 | scpB  | 419.2   | 385.7   | 371.1   | 399.1   | 210.8   | 277.1   | 234.6   | 349.1    | 475.2   | 961.9   | 392.9   | 450.6   | 350.6   |
| Bbr_1224 | scpA  | 797.6   | 830.6   | 697.4   | 882.1   | 663.2   | 201.8   | 871.1   | 404.0    | 783.3   | 1659.4  | 562.6   | 914.1   | 729.2   |
| Bbr_1225 | parA1 | 2464.1  | 2497.7  | 2108.6  | 2181.4  | 1428.1  | 1093.1  | 1511.1  | 888.6    | 3596.1  | 4512.9  | 2176.3  | 2686.4  | 2214.1  |
| Bbr_1226 |       | 1301.9  | 1119.9  | 1119.9  | 1119.9  | 1119.9  | 1119.9  | 1119.9  | 1119.9   | 1119.9  | 1119.9  | 1119.9  | 1119.9  | 1119.9  |
| Bbr_1227 | glxK  | 317.4   | 384.1   | 315.1   | 559.3   | 148.3   | 315.1   | 201.8   | 100.5    | 354.0   | 779.5   | 465.7   | 238.1   | 300.4   |
| Bbr_1228 | rplT  | 7826.8  | 8711.0  | 8165.6  | 9447.3  | 9494.6  | 7268.3  | 9735.1  | 4967.4   | 9022.0  | 6115.6  | 17869.0 | 30029.3 | 10352.2 |
| Bbr_1229 | rplM  | 10999.0 | 12451.4 | 11139.8 | 13589.9 | 7995.8  | 13281.4 | 6491.0  | 4211.2   | 9103.8  | 6597.5  | 22309.3 | 42577.6 | 11339.8 |
| Bbr_1230 | infC  | 10019.3 | 11717.7 | 9541.4  | 14243.0 | 7576.1  | 26175.3 | 5788.1  | 14970.3  | 10813.5 | 9834.2  | 18566.9 | 48973.6 | 10384.2 |
| Bbr_1231 |       | 170.4   | 305.4   | 137.2   | 412.6   | 971.7   | 240.5   | 240.5   | 3951.5   | 837.2   | 1053.4  | 245.2   | 491.4   | 308.3   |
| Bbr_1232 |       | 437.7   | 494.6   | 384.7   | 463.3   | 245.5   | 196.6   | 339.9   | 181.6    | 584.1   | 1335.6  | 580.7   | 1374.5  | 429.8   |
| Bbr_1233 | gap   | 12393.4 | 2046.7  | 12393.4 | 11644.7 | 11243.9 | 11243.9 | 11243.9 | 11243.9  | 11243.9 | 11243.9 | 11243.9 | 11243.9 | 11243.9 |
| Bbr_1234 |       | 3812.7  | 3880.1  | 3526.2  | 4465.1  | 4414.9  | 2866.4  | 2187.3  | 2098.7   | 2798.7  | 3904.2  | 2928.3  | 6901.1  | 3566.0  |
| Bbr_1235 | ispH  | 513.0   | 450.1   | 394.6   | 347.9   | 343.9   | 882.7   | 547.5   | 8302.0   | 637.4   | 1798.2  | 336.4   | 575.7   | 462.1   |
| Bbr_1236 |       | 7290.8  | 6483.6  | 6901.2  | 2891.2  | 6099.0  | 1013.1  | 1396.0  | 1607.1   | 3541.8  | 1781.5  | 4299.3  | 2240.9  | 5757.9  |
| Bbr_1237 |       | 5306.6  | 5253.1  | 5032.7  | 2167.0  | 4176.8  | 1010.2  | 4915.8  | 1607.1   | 3765.9  | 1387.5  | 4867.7  | 2346.6  | 4677.6  |
| Bbr_1238 |       | 2125.4  | 1869.9  | 1996.1  | 2423.9  | 2920.3  | 17157.8 | 2659.7  | 47695.3  | 2361.7  | 9615.9  | 882.0   | 1174.2  | 2157.5  |
| Bbr_1239 | slgH  | 1373.8  | 1212.4  | 1201.2  | 1036.1  | 1567.5  | 1109.0  | 1596.2  | 3284.4   | 2084.6  | 3432.5  | 1092.3  | 1037.0  | 1485.9  |
| Bbr_1240 | mur   | 1589.7  | 1480.0  | 1452.0  | 1480.0  | 1452.0  | 1480.0  | 1452.0  | 1        |         |         |         |         |         |

|          |           |         |         |         |         |         |         |         |         |         |         |         |         |         |
|----------|-----------|---------|---------|---------|---------|---------|---------|---------|---------|---------|---------|---------|---------|---------|
| Bbr_1242 |           | 554.4   | 607.0   | 538.3   | 730.6   | 403.1   | 519.3   | 495.5   | 805.6   | 724.9   | 1471.4  | 914.6   | 710.3   | 605.1   |
| Bbr_1243 | smc       | 265.7   | 228.5   | 222.0   | 448.0   | 248.1   | 183.8   | 248.1   | 425.9   | 490.0   | 1811.3  | 265.8   | 144.5   | 286.7   |
| Bbr_1244 | folC      | 5446.6  | 6093.4  | 4842.4  | 9287.1  | 5464.6  | 14120.9 | 4301.1  | 4593.3  | 4401.6  | 21910.0 | 2455.8  | 2475.8  | 4485.4  |
| Bbr_1245 | pepP      | 3009.3  | 3133.5  | 2709.8  | 1438.9  | 1442.9  | 2714.1  | 1438.9  | 559.2   | 1865.9  | 2808.2  | 3301.9  | 1654.7  | 2294.8  |
| Bbr_1246 |           | 2292.9  | 2335.4  | 2129.8  | 2010.3  | 1185.6  | 487.9   | 1405.4  | 621.4   | 1228.0  | 2009.0  | 2739.4  | 1392.6  | 1830.2  |
| Bbr_1247 | nagA2     | 1835.5  | 1278.6  | 1572.6  | 1493.9  | 1091.1  | 3566.5  | 954.8   | 1101.9  | 556.0   | 1067.0  | 1679.8  | 947.8   | 1281.9  |
| Bbr_1248 | nagB3     | 5128.5  | 4059.7  | 4652.0  | 4286.0  | 3896.9  | 8351.0  | 3698.6  | 5149.0  | 2006.3  | 1516.3  | 4094.8  | 1504.6  | 3912.9  |
| Bbr_1249 |           | 634.8   | 603.6   | 563.2   | 811.1   | 392.0   | 2017.5  | 449.7   | 1275.5  | 1126.7  | 3051.3  | 587.1   | 799.5   | 625.6   |
| Bbr_1250 |           | 545.1   | 397.1   | 423.2   | 419.6   | 335.9   | 2396.5  | 350.3   | 1131.2  | 807.8   | 671.0   | 356.6   | 416.2   | 469.8   |
| Bbr_1251 |           | 945.4   | 1410.5  | 778.5   | 577.7   | 649.8   | 676.1   | 785.3   | 420.1   | 1165.2  | 541.8   | 468.8   | 584.4   | 798.8   |
| Bbr_1252 |           | 6385.8  | 10659.3 | 5669.6  | 7464.8  | 6660.5  | 2774.3  | 7563.7  | 3201.6  | 3188.7  | 2144.2  | 4016.4  | 1498.0  | 5580.8  |
| Bbr_1254 |           | 625.2   | 588.5   | 519.8   | 509.7   | 489.5   | 706.2   | 672.1   | 1634.3  | 900.7   | 1153.8  | 498.1   | 1230.1  | 617.6   |
| Bbr_1255 | ftsQ      | 623.8   | 606.5   | 516.8   | 584.4   | 571.4   | 351.3   | 703.8   | 1020.6  | 1259.4  | 1729.0  | 531.7   | 971.4   | 701.1   |
| Bbr_1256 | murC      | 1193.8  | 1205.0  | 1008.0  | 933.5   | 859.1   | 293.2   | 1029.9  | 285.6   | 859.3   | 1660.1  | 930.0   | 1146.6  | 980.0   |
| Bbr_1257 | murG      | 3312.1  | 3191.8  | 2750.0  | 2864.0  | 2415.7  | 1707.0  | 2646.8  | 2140.7  | 3349.4  | 3605.9  | 2376.3  | 3614.6  | 2808.4  |
| Bbr_1258 | fstW      | 2010.3  | 1946.9  | 1676.2  | 1636.9  | 2077.5  | 247.3   | 2012.1  | 619.3   | 1707.9  | 1336.1  | 1321.7  | 1701.8  | 1801.0  |
| Bbr_1259 | murD      | 3364.3  | 3412.4  | 2792.9  | 2393.0  | 1516.8  | 654.1   | 1526.8  | 395.6   | 1991.7  | 2025.1  | 2023.7  | 1984.4  | 2202.7  |
| Bbr_1260 | murX      | 3947.8  | 3810.5  | 3547.5  | 2961.3  | 3263.5  | 1084.9  | 3723.8  | 1715.6  | 2732.5  | 2534.2  | 2625.7  | 2934.8  | 3306.8  |
| Bbr_1261 | murF      | 4268.7  | 4215.9  | 3753.7  | 3453.1  | 2389.3  | 881.2   | 2482.7  | 762.2   | 3373.6  | 2913.2  | 3162.4  | 3486.2  | 3240.1  |
| Bbr_1262 |           | 3741.4  | 4065.3  | 2422.3  | 3901.9  | 2297.6  | 2297.6  | 2535.9  | 2544.8  | 4483.4  | 4501.5  | 2831.4  | 3891.5  | 3291.7  |
| Bbr_1263 | ftsI      | 3872.7  | 3400.7  | 3279.9  | 2802.4  | 2969.0  | 783.6   | 3116.2  | 1055.6  | 2260.8  | 3128.0  | 1797.1  | 2022.6  | 2882.6  |
| Bbr_1264 |           | 3532.9  | 3015.3  | 3043.1  | 2512.9  | 1635.9  | 1169.7  | 1574.0  | 567.6   | 2241.1  | 4120.3  | 1398.9  | 2249.5  | 2237.6  |
| Bbr_1265 | mraW      | 2150.5  | 1828.1  | 1693.6  | 1696.3  | 2401.5  | 2273.2  | 1932.4  | 2962.1  | 1707.9  | 4675.5  | 2023.7  | 2286.6  | 1814.9  |
| Bbr_1266 | mraZ      | 3103.2  | 2662.4  | 2470.8  | 2240.6  | 1819.1  | 4092.6  | 1622.8  | 3746.1  | 2231.9  | 5214.7  | 982.2   | 3160.1  | 2038.3  |
| Bbr_1267 |           | 461.2   | 411.9   | 435.8   | 396.5   | 312.5   | 97.0    | 424.6   | 174.0   | 4156.1  | 5102.6  | 664.3   | 343.0   | 1075.7  |
| Bbr_1268 | serA1     | 654.9   | 527.9   | 512.0   | 362.2   | 360.4   | 818.3   | 411.6   | 1859.4  | 1050.4  | 1347.1  | 370.6   | 1006.7  | 666.0   |
| Bbr_1269 |           | 2243.7  | 2160.3  | 1795.8  | 3528.9  | 3069.7  | 11825.7 | 3071.6  | 34722.8 | 1943.0  | 4599.1  | 1420.8  | 23053.2 | 2257.4  |
| Bbr_1270 |           | 894.4   | 894.4   | 788.5   | 923.5   | 1287.9  | 783.2   | 1287.9  | 5937.7  | 1079.3  | 6291.6  | 2939.2  | 899.3   | 691.5   |
| Bbr_1271 | lexA      | 2364.5  | 2639.6  | 2424.0  | 4341.0  | 2911.9  | 7334.8  | 2784.2  | 18427.7 | 1668.7  | 5726.6  | 1094.8  | 7696.1  | 2208.0  |
| Bbr_1272 | czcD      | 828.9   | 1112.0  | 734.9   | 1977.2  | 621.9   | 5226.6  | 652.6   | 1179.9  | 1125.5  | 2362.1  | 308.6   | 10337.3 | 712.1   |
| Bbr_1273 | ldh2      | 32896.3 | 28056.2 | 38499.9 | 30483.4 | 39516.1 | 14903.1 | 40814.4 | 7150.3  | 13159.8 | 16484.5 | 27390.3 | 9649.0  | 32046.1 |
| Bbr_1274 | hliX      | 516.2   | 550.1   | 437.7   | 638.5   | 403.8   | 347.2   | 561.6   | 614.9   | 1097.3  | 1111.4  | 397.0   | 568.9   | 568.9   |
| Bbr_1275 |           | 753.9   | 980.0   | 665.7   | 932.3   | 370.4   | 1142.5  | 373.3   | 565.5   | 898.5   | 1721.9  | 587.7   | 356.6   | 573.4   |
| Bbr_1276 | hrpA      | 472.9   | 449.9   | 409.7   | 646.8   | 406.2   | 296.0   | 403.7   | 656.3   | 899.3   | 3009.6  | 445.1   | 216.2   | 506.0   |
| Bbr_1277 |           | 303.3   | 350.4   | 354.4   | 354.4   | 354.4   | 354.4   | 354.4   | 354.4   | 354.4   | 354.4   | 354.4   | 354.4   | 354.4   |
| Bbr_1278 | glnA2     | 1055.7  | 1230.2  | 1016.4  | 1171.9  | 751.5   | 139.2   | 938.4   | 285.4   | 1009.3  | 1575.3  | 1652.6  | 1180.0  | 1070.6  |
| Bbr_1279 |           | 400.1   | 416.5   | 319.8   | 239.9   | 232.0   | 128.0   | 332.0   | 191.1   | 925.2   | 525.6   | 268.7   | 80.2    | 413.0   |
| Bbr_1280 | hisA      | 924.3   | 915.8   | 813.3   | 875.2   | 457.8   | 97.4    | 537.2   | 134.4   | 530.9   | 992.3   | 809.1   | 1563.0  | 678.8   |
| Bbr_1281 | hisH      | 1441.9  | 1450.5  | 1122.5  | 1130.5  | 809.0   | 178.7   | 933.0   | 261.5   | 1128.6  | 1128.6  | 775.2   | 1683.5  | 968.6   |
| Bbr_1282 |           | 2251.2  | 2342.9  | 1956.4  | 2104.8  | 1332.2  | 448.2   | 1653.9  | 380.8   | 1851.4  | 2717.9  | 1956.5  | 4633.0  | 1833.6  |
| Bbr_1283 | hisB      | 2690.5  | 2905.5  | 2646.8  | 2739.5  | 2130.8  | 565.7   | 2665.2  | 1252.9  | 3158.4  | 3406.3  | 2794.9  | 4971.5  | 2681.1  |
| Bbr_1284 | hisC      | 3629.4  | 4010.4  | 2086.5  | 3336.3  | 1978.3  | 3336.3  | 2086.5  | 640.6   | 5230.4  | 2271.3  | 6280.4  | 6359.2  | 2693.2  |
| Bbr_1285 | hisD      | 3305.5  | 3889.2  | 3209.4  | 3539.7  | 3344.1  | 587.2   | 4220.1  | 817.6   | 1878.2  | 3577.6  | 2438.8  | 8207.4  | 3082.2  |
| Bbr_1286 | acyP      | 566.1   | 457.6   | 589.0   | 541.1   | 537.8   | 583.9   | 639.6   | 612.6   | 1204.4  | 3196.6  | 1103.0  | 6435.7  | 773.3   |
| Bbr_1287 |           | 14760.4 | 10168.4 | 14634.9 | 9954.2  | 11395.8 | 9534.4  | 8165.7  | 2967.5  | 4311.2  | 16723.1 | 1560.3  | 620.3   | 9138.1  |
| Bbr_1288 |           | 224.0   | 400.5   | 191.4   | 298.1   | 244.5   | 128.2   | 317.2   | 163.7   | 434.3   | 1060.5  | 393.6   | 7560.8  | 300.8   |
| Bbr_1289 | dapA3     | 305.2   | 476.2   | 264.9   | 376.3   | 348.9   | 348.9   | 219.2   | 252.2   | 364.9   | 533.1   | 286.1   | 11430.9 | 270.0   |
| Bbr_1290 |           | 104.8   | 60.5    | 103.2   | 73.4    | 57.2    | 223.2   | 74.3    | 144.0   | 273.8   | 514.5   | 301.8   | 15245.8 | 152.5   |
| Bbr_1291 | hisC      | 212.2   | 135.0   | 180.2   | 149.7   | 104.7   | 463.9   | 104.7   | 323.2   | 496.1   | 1036.5  | 889.4   | 34609.3 | 334.7   |
| Bbr_1293 |           | 5608.4  | 3852.7  | 4470.5  | 1261.3  | 2726.9  | 258.1   | 2941.5  | 302.0   | 4695.4  | 2448.3  | 10562.0 | 4145.9  | 5167.5  |
| Bbr_1294 | dkgV      | 1171.8  | 1720.8  | 959.7   | 1175.1  | 1342.8  | 1046.0  | 1046.0  | 1167.2  | 896.7   | 1017.6  | 370.1   | 544.1   | 346.9   |
| Bbr_1295 |           | 329.3   | 396.3   | 274.9   | 467.3   | 182.5   | 533.3   | 216.0   | 725.1   | 708.9   | 1017.6  | 370.1   | 544.1   | 346.9   |
| Bbr_1296 | dnaE      | 638.6   | 558.8   | 542.8   | 467.1   | 696.2   | 108.2   | 945.7   | 618.1   | 1459.5  | 1960.7  | 836.0   | 461.5   | 853.1   |
| Bbr_1297 |           | 1066.8  | 2423.2  | 858.9   | 1782.9  | 595.5   | 2393.3  | 623.0   | 969.9   | 1979.0  | 2323.2  | 441.9   | 1256.1  | 927.5   |
| Bbr_1298 |           | 1680.7  | 1717.0  | 1475.6  | 1496.6  | 866.3   | 477.9   | 1015.0  | 517.2   | 1921.0  | 1523.8  | 1657.8  | 2525.4  | 1436.1  |
| Bbr_1299 | ispA      | 8982.7  | 6996.7  | 7050.8  | 5725.0  | 7719.2  | 4663.4  | 7052.2  | 8915.6  | 3372.1  | 2517.0  | 4894.4  | 5594.7  | 6495.0  |
| Bbr_1300 |           | 21066.4 | 16446.8 | 20260.7 | 10918.1 | 40546.3 | 4385.9  | 32239.1 | 8660.2  | 19288.0 | 19395.5 | 25641.3 | 23344.6 | 26507.0 |
| Bbr_1301 |           | 7089.7  | 5958.6  | 6923.9  | 5935.7  | 8642.1  | 1944.7  | 8642.1  | 2113.2  | 3152.9  | 5128.7  | 3057.7  | 6014.9  | 6014.9  |
| Bbr_1302 |           | 7281.3  | 7579.4  | 6098.7  | 6319.2  | 7165.5  | 2921.5  | 6317.3  | 1322.1  | 3867.0  | 6261.8  | 4071.8  | 2597.9  | 5800.3  |
| Bbr_1303 | ftsZ      | 6990.8  | 7455.0  | 6228.1  | 7023.1  | 7861.8  | 10903.6 | 7722.6  | 11697.6 | 5261.7  | 9720.2  | 5145.8  | 4340.2  | 6535.1  |
| Bbr_1304 |           | 448.1   | 633.3   | 405.4   | 589.3   | 314.7   | 243.1   | 484.2   | 228.1   | 573.8   | 969.2   | 476.8   | 1666.7  | 450.5   |
| Bbr_1305 | glyS      | 4501.3  | 5878.1  | 4514.0  | 5584.4  | 3466.6  | 3581.2  | 2912.4  | 1371.7  | 5567.3  | 3850.0  | 6558.0  | 13225.7 | 4586.6  |
| Bbr_1306 |           | 568.7   | 907.7   | 495.9   | 1183.7  | 591.5   | 3577.2  | 509.3   | 3466.1  | 709.5   | 1271.7  | 631.3   | 13251.1 | 584.4   |
| Bbr_1307 |           | 505.5   | 864.0   | 595.1   | 528.6   | 319.3   | 4362.2  | 331.9   | 451.5   | 3372.1  | 2517.0  | 4894.4  | 5594.7  | 6495.0  |
| Bbr_1308 |           | 2831.0  | 3676.5  | 2425.1  | 4250.3  | 3484.9  | 14534.8 | 3075.1  | 24245.5 | 1640.2  | 2521.5  | 5225.3  | 64512.9 | 3113.6  |
| Bbr_1309 |           | 2601.0  | 4158.8  | 2227.0  | 4563.3  | 2416.1  | 17081.0 | 1844.7  | 20695.6 | 1064.6  | 2962.6  | 4761.3  | 76515.6 | 2485.8  |
| Bbr_1310 |           | 2496.3  | 3944.5  | 2185.3  | 4598.7  | 2474.1  | 17703.1 | 1968.0  | 24018.8 | 1257.0  | 3234.1  | 5860.0  | 87827.5 | 2706.8  |
| Bbr_1311 | thiM      | 597.4   | 471.4   | 489.9   | 572.9   | 352.7   | 1738.0  | 378.5   | 893.2   | 751.2   | 1502.0  | 320.7   | 2304.7  | 481.7   |
| Bbr_1312 | thiE/thiC | 494.2   | 412.3   | 296.3   | 377.5   | 296.3   | 226.3   | 392.3   | 218.9   | 385.9   | 702.7   | 478.1   | 601.7   | 430.4   |
| Bbr_1313 |           | 511.1   | 527.8   | 445.9   | 539.6   | 399.4   | 733.7   | 437.6   | 831.1   | 604.4   | 1638.2  | 627.6   | 1063.8  | 537.7   |
| Bbr_1314 | thiD      | 2952.1  | 3192.4  | 2719.4  | 3695.0  | 2696.5  | 2777.7  | 2777.7  | 2547.1  | 3477.1  | 6789.1  | 2940.7  | 1471.5  | 2315.8  |
| Bbr_1315 |           | 2378.7  | 2489.9  | 1992.0  | 2267.1  | 1414.8  | 1269.5  | 1547.5  | 848.6   | 2574.4  | 5226.4  | 2121.5  | 830.5   | 2004.8  |
| Bbr_1316 |           | 78.2    | 109.5   | 66.7    | 71.3    | 69.7    | 78.6    | 105.6   | 89.6    | 415.6   | 327.8   | 39.6    | 100.2   | 129.2   |
| Bbr_1317 |           | 191.8   | 173.3   | 139.5   | 223.1   | 105.7   | 223.1   | 142.0   | 361.9   | 586.8   | 604.5   | 169.2   | 217.6   | 217.6   |
| Bbr_1318 |           | 288.3   | 219.2   | 232.3   | 170.7   | 188.8   | 375.3   | 250.9   | 1538.0  | 617.5   | 434.5   | 166.9   | 126.3   | 290.8   |
| Bbr_1319 |           | 159.3   | 128.3   | 136.0   | 67.7    | 149.0   | 212.3   | 184.1   | 617.5   | 692.0   | 332.1   | 102.3   | 42.6    | 237.1   |
| Bbr_1320 |           | 217.6   | 184.4   | 254.7   | 249.4   | 151.9   | 197.0   | 255.8   | 497.6   | 327.9   | 233.5   | 127.6   | 63.9    | 222.6   |
| Bbr_1321 |           | 729.8   | 779.9   | 779.9   | 903.1   | 903.1   |         |         |         |         |         |         |         |         |



|          |       |         |         |         |          |         |         |         |         |         |         |         |         |         |
|----------|-------|---------|---------|---------|----------|---------|---------|---------|---------|---------|---------|---------|---------|---------|
| Bbr_1323 | fosB  | 60.5    | 46.6    | 54.0    | 34.3     | 74.6    | 95.6    | 88.0    | 140.6   | 476.7   | 167.0   | 26.3    | 78.5    | 130.0   |
| Bbr_1324 | fosC  | 217.2   | 172.4   | 167.0   | 136.5    | 182.6   | 235.5   | 172.9   | 455.4   | 528.6   | 369.9   | 157.3   | 112.4   | 237.6   |
| Bbr_1325 | ppgK  | 22788.7 | 13838.3 | 19134.9 | 5624.3   | 16862.2 | 2962.5  | 15029.6 | 3091.6  | 6416.4  | 3129.8  | 7382.4  | 3172.4  | 14602.4 |
| Bbr_1326 |       | 1036.4  | 986.6   | 908.5   | 663.3    | 670.8   | 223.3   | 896.2   | 393.5   | 1752.1  | 1380.0  | 712.0   | 101.9   | 996.0   |
| Bbr_1327 |       | 2314.7  | 2550.1  | 1952.1  | 2463.6   | 1705.3  | 2268.3  | 2097.2  | 2157.5  | 2787.5  | 4535.4  | 1727.0  | 571.8   | 2097.3  |
| Bbr_1328 |       | 2131.2  | 1764.4  | 1921.6  | 2307.0   | 1691.5  | 13660.8 | 1361.8  | 1903.0  | 1725.9  | 5273.2  | 1014.8  | 1661.7  | 1641.1  |
| Bbr_1329 |       | 390.4   | 352.5   | 330.3   | 479.8    | 214.6   | 328.5   | 295.3   | 80.6    | 675.3   | 92.0    | 252.8   | 261.1   | 380.9   |
| Bbr_1330 |       | 1271.4  | 1325.1  | 1079.2  | 1238.8   | 662.7   | 1021.3  | 705.7   | 731.7   | 2233.8  | 2311.3  | 1424.0  | 525.6   | 1229.5  |
| Bbr_1331 |       | 829.0   | 512.6   | 711.8   | 479.3    | 574.6   | 1630.1  | 690.2   | 4495.9  | 1262.9  | 1065.8  | 531.2   | 1101.0  | 766.6   |
| Bbr_1332 |       | 22.8    | 27.7    | 21.5    | 31.3     | 24.2    | 17.3    | 34.6    | 40.7    | 488.3   | 273.9   | 21.1    | 53.7    | 102.1   |
| Bbr_1333 |       | 41.8    | 40.9    | 24.9    | 30.1     | 23.8    | 30.8    | 33.0    | 28.3    | 673.1   | 346.3   | 17.4    | 202.7   | 135.7   |
| Bbr_1334 |       | 264.5   | 313.6   | 206.6   | 348.5    | 178.2   | 395.6   | 250.6   | 68.8    | 1028.4  | 1121.3  | 325.9   | 151.1   | 375.7   |
| Bbr_1337 |       | 926.6   | 1008.7  | 870.7   | 1424.2   | 720.4   | 1905.1  | 817.4   | 4172.3  | 1018.1  | 3335.8  | 915.1   | 1429.8  | 878.1   |
| Bbr_1338 |       | 1089.7  | 1052.4  | 987.3   | 1045.0   | 455.4   | 233.1   | 526.1   | 135.1   | 1861.5  | 2955.2  | 817.4   | 583.0   | 956.2   |
| Bbr_1339 |       | 4144.6  | 3150.7  | 3901.0  | 2979.9   | 2227.6  | 2023.1  | 2023.3  | 596.4   | 3756.0  | 7093.0  | 1962.8  | 1095.2  | 3002.5  |
| Bbr_1340 |       | 128.0   | 303.5   | 115.4   | 564.5    | 119.6   | 331.4   | 166.5   | 2542.9  | 429.4   | 1217.2  | 133.7   | 186.9   | 182.1   |
| Bbr_1341 |       | 206.4   | 381.3   | 139.5   | 145.1    | 113.3   | 58.0    | 154.2   | 118.0   | 742.6   | 470.2   | 218.3   | 76.5    | 262.4   |
| Bbr_1342 |       | 79.4    | 87.5    | 64.9    | 67.9     | 49.1    | 49.0    | 55.4    | 93.3    | 623.0   | 310.8   | 64.0    | 128.9   | 156.0   |
| Bbr_1343 | gluD  | 344.5   | 349.3   | 295.6   | 249.8    | 281.7   | 138.0   | 352.4   | 434.4   | 474.9   | 756.4   | 404.4   | 658.5   | 358.9   |
| Bbr_1344 | gluC  | 690.2   | 697.8   | 635.9   | 607.9    | 345.3   | 143.9   | 390.4   | 212.2   | 965.2   | 859.4   | 887.1   | 964.6   | 619.0   |
| Bbr_1345 | gluB  | 713.4   | 798.1   | 651.8   | 738.9    | 689.0   | 197.1   | 894.3   | 538.3   | 3700.0  | 1091.6  | 821.4   | 1215.7  | 745.0   |
| Bbr_1346 | gluA  | 583.1   | 658.4   | 546.5   | 640.6    | 279.8   | 614.3   | 319.9   | 749.8   | 883.7   | 1281.2  | 693.8   | 1059.9  | 551.2   |
| Bbr_1347 |       | 166.2   | 184.7   | 124.8   | 174.2    | 161.3   | 176.0   | 161.3   | 377.3   | 286.7   | 453.0   | 92.5    | 185.5   | 161.5   |
| Bbr_1348 | aspS  | 7632.2  | 8624.1  | 7177.5  | 8229.3   | 5121.2  | 1660.7  | 5096.4  | 1872.4  | 4230.6  | 3944.9  | 8098.3  | 5244.8  | 6226.0  |
| Bbr_1349 | hisS  | 4266.6  | 4903.9  | 4127.4  | 4877.0   | 5357.0  | 1410.4  | 5016.3  | 2597.0  | 3496.4  | 3492.0  | 4366.6  | 2570.0  | 4438.4  |
| Bbr_1350 |       | 2035.0  | 1946.4  | 1771.5  | 1887.7   | 1160.6  | 1781.1  | 1121.5  | 1093.6  | 1920.3  | 2871.3  | 2606.1  | 1722.7  | 1769.2  |
| Bbr_1351 |       | 83.0    | 75.4    | 59.9    | 68.4     | 61.6    | 83.9    | 85.9    | 138.0   | 657.5   | 854.3   | 11.0    | 12.3    | 159.6   |
| Bbr_1352 |       | 62.7    | 82.0    | 60.3    | 67.5     | 66.1    | 167.9   | 69.7    | 66.1    | 67.2    | 238.3   | 67.2    | 67.2    | 93.7    |
| Bbr_1353 | proP  | 59.9    | 63.2    | 44.8    | 33.4     | 38.4    | 37.6    | 46.1    | 84.6    | 617.8   | 346.1   | 44.5    | 98.6    | 141.9   |
| Bbr_1354 |       | 73.5    | 82.4    | 59.4    | 42.3     | 50.3    | 50.3    | 105.9   | 361.4   | 528.9   | 521.9   | 58.4    | 136.1   | 150.5   |
| Bbr_1355 | codA  | 78.7    | 105.3   | 64.2    | 76.6     | 61.6    | 121.9   | 76.0    | 314.8   | 829.6   | 769.8   | 63.3    | 54.0    | 195.6   |
| Bbr_1356 | clpC  | 10231.6 | 9100.7  | 9423.3  | 11455.8  | 9697.6  | 6762.1  | 8567.5  | 3123.4  | 5850.4  | 13877.3 | 6658.2  | 4327.9  | 8404.8  |
| Bbr_1357 |       | 2878.4  | 2717.1  | 2474.4  | 2377.4   | 2853.0  | 3747.2  | 1857.3  | 1885.6  | 1393.2  | 2576.1  | 837.9   | 501.7   | 1923.3  |
| Bbr_1358 |       | 3887.7  | 4515.1  | 3173.6  | 3390.8   | 2088.0  | 723.3   | 2970.8  | 953.8   | 2248.6  | 2661.0  | 1852.4  | 2361.7  | 2831.0  |
| Bbr_1359 | cspB  | 7919.9  | 8154.9  | 6705.3  | 8317.4   | 6304.9  | 6705.3  | 3506.3  | 6317.4  | 3776.1  | 4304.1  | 2339.5  | 1956.2  | 3574.7  |
| Bbr_1360 |       | 837.3   | 527.1   | 756.3   | 500.6    | 781.5   | 108.4   | 1050.0  | 638.7   | 1449.8  | 1186.4  | 508.8   | 470.9   | 897.3   |
| Bbr_1361 |       | 4773.9  | 4141.3  | 4092.2  | 3969.4   | 3177.2  | 4445.0  | 2199.8  | 7956.2  | 7513.2  | 7513.2  | 2367.9  | 1658.7  | 4194.8  |
| Bbr_1362 |       | 1010.6  | 987.2   | 854.7   | 850.7    | 766.7   | 1083.4  | 1001.0  | 544.8   | 1579.4  | 2737.5  | 1170.0  | 1162.9  | 1063.7  |
| Bbr_1363 |       | 279.8   | 399.1   | 231.5   | 323.3    | 183.3   | 238.4   | 267.5   | 467.5   | 1123.6  | 2206.2  | 87.0    | 46.9    | 362.1   |
| Bbr_1364 | groEL | 31573.5 | 64972.6 | 35390.4 | 130322.0 | 34839.1 | 66871.3 | 24788.4 | 67460.3 | 24788.4 | 91760.7 | 22707.8 | 24380.5 | 36028.6 |
| Bbr_1365 | cspA  | 2914.3  | 2472.4  | 2540.2  | 3225.0   | 2447.3  | 11636.8 | 2606.2  | 29999.3 | 4002.4  | 8169.4  | 2822.5  | 5187.1  | 2888.8  |
| Bbr_1366 |       | 5081.0  | 5300.4  | 4403.3  | 5064.5   | 2924.9  | 4048.6  | 2642.9  | 1554.9  | 6221.8  | 7023.9  | 3972.1  | 5503.2  | 4217.7  |
| Bbr_1367 | ung   | 441.4   | 551.0   | 350.6   | 623.4    | 271.4   | 552.9   | 333.3   | 172.2   | 1420.5  | 2044.5  | 588.5   | 551.0   | 567.6   |
| Bbr_1368 | moxR2 | 1338.7  | 1606.5  | 1350.9  | 2433.6   | 658.2   | 230.5   | 739.8   | 230.5   | 1871.3  | 3315.4  | 3028.5  | 2011.5  | 1328.4  |
| Bbr_1369 |       | 800.0   | 878.3   | 726.4   | 1035.7   | 573.9   | 284.2   | 763.9   | 398.4   | 2922.1  | 2252.7  | 1532.6  | 2617.5  | 1219.8  |
| Bbr_1370 |       | 588.6   | 596.1   | 517.1   | 618.4    | 324.6   | 159.2   | 431.1   | 189.5   | 953.1   | 1111.9  | 798.0   | 942.0   | 602.1   |
| Bbr_1371 |       | 750.0   | 661.1   | 678.7   | 602.8    | 442.2   | 445.0   | 530.6   | 660.9   | 1492.3  | 1379.8  | 1302.2  | 1394.4  | 866.0   |
| Bbr_1372 |       | 618.6   | 506.4   | 428.6   | 428.6    | 359.4   | 91.4    | 523.6   | 161.7   | 1814.1  | 948.3   | 1063.3  | 844.1   | 819.2   |
| Bbr_1373 |       | 854.2   | 664.0   | 791.7   | 671.4    | 676.9   | 764.5   | 647.7   | 1263.3  | 1224.8  | 880.1   | 1115.2  | 1072.0  | 885.1   |
| Bbr_1374 |       | 52.0    | 46.7    | 34.9    | 38.0     | 28.9    | 59.5    | 37.4    | 99.6    | 706.5   | 652.8   | 48.2    | 291.9   | 151.3   |
| Bbr_1375 |       | 61.1    | 50.0    | 46.8    | 42.4     | 46.8    | 53.6    | 101.1   | 271.2   | 306.9   | 401.8   | 21.1    | 122.0   | 102.2   |
| Bbr_1376 |       | 2750.7  | 3545.1  | 2315.8  | 3407.3   | 2717.7  | 5711.3  | 2981.9  | 12148.1 | 3391.3  | 3592.9  | 1734.1  | 2351.1  | 2648.6  |
| Bbr_1377 | purB  | 5066.3  | 6133.6  | 4557.3  | 6430.0   | 5404.2  | 2915.8  | 5548.3  | 1616.9  | 6422.5  | 6323.9  | 5904.1  | 4413.2  | 5483.8  |
| Bbr_1378 |       | 672.6   | 626.5   | 562.2   | 716.1    | 398.8   | 364.8   | 429.5   | 396.9   | 833.5   | 1044.0  | 460.2   | 340.5   | 559.1   |
| Bbr_1379 |       | 29757.7 | 22568.8 | 26376.8 | 11397.4  | 40556.8 | 4481.4  | 43977.6 | 35532.0 | 21669.4 | 22777.0 | 14162.0 | 3401.0  | 29416.7 |
| Bbr_1380 |       | 1379.9  | 1536.5  | 1094.2  | 1395.6   | 719.6   | 235.0   | 635.0   | 243.2   | 1494.7  | 1611.5  | 856.3   | 420.0   | 1061.6  |
| Bbr_1381 |       | 2352.3  | 2815.2  | 2044.9  | 1898.8   | 1628.3  | 503.6   | 2084.2  | 553.6   | 2496.8  | 2516.5  | 1690.5  | 883.5   | 2047.7  |
| Bbr_1382 |       | 2205.2  | 2112.8  | 2112.8  | 2462.1   | 2103.4  | 1471.2  | 2027.6  | 1321.1  | 2809.4  | 3334.4  | 1927.2  | 1164.8  | 2197.6  |
| Bbr_1383 |       | 558.0   | 658.5   | 547.4   | 616.3    | 688.5   | 622.0   | 818.0   | 2285.6  | 947.9   | 1059.9  | 549.7   | 308.4   | 684.9   |
| Bbr_1384 | rpe2  | 26.4    | 48.7    | 26.2    | 29.0     | 34.3    | 28.6    | 40.4    | 14.3    | 677.8   | 182.3   | 28.2    | 19.9    | 138.9   |
| Bbr_1385 |       | 189.8   | 219.0   | 154.4   | 71.3     | 202.4   | 96.1    | 238.9   | 277.9   | 1137.5  | 260.2   | 187.4   | 93.2    | 351.7   |
| Bbr_1386 |       | 122.4   | 130.4   | 120.0   | 74.0     | 106.8   | 101.7   | 145.1   | 170.8   | 375.9   | 244.9   | 100.3   | 53.9    | 161.8   |
| Bbr_1387 |       | 56.4    | 64.3    | 46.8    | 36.3     | 56.3    | 33.0    | 80.6    | 64.9    | 750.9   | 230.9   | 42.0    | 38.2    | 172.2   |
| Bbr_1388 |       | 32.1    | 37.6    | 31.4    | 42.0     | 38.0    | 31.4    | 58.3    | 45.0    | 114.2   | 118.0   | 14.2    | 77.9    | 77.9    |
| Bbr_1389 |       | 34.1    | 35.3    | 21.0    | 26.8     | 29.0    | 22.2    | 41.8    | 29.6    | 432.4   | 121.2   | 8.7     | 39.8    | 94.5    |
| Bbr_1390 |       | 203.4   | 284.0   | 177.6   | 237.9    | 144.6   | 302.5   | 195.8   | 526.0   | 863.8   | 777.2   | 178.4   | 84.6    | 293.9   |
| Bbr_1391 |       | 656.7   | 512.0   | 952.1   | 797.5    | 351.4   | 463.0   | 404.6   | 1231.9  | 1038.0  | 1255.8  | 557.5   | 781.5   | 660.1   |
| Bbr_1392 | dedA2 | 771.7   | 722.6   | 627.2   | 607.3    | 613.5   | 226.0   | 869.7   | 398.5   | 713.2   | 1153.0  | 566.7   | 1018.0  | 693.7   |
| Bbr_1393 | serB1 | 68.8    | 106.1   | 53.9    | 121.1    | 44.6    | 64.5    | 69.9    | 232.8   | 472.8   | 581.9   | 38.7    | 53.5    | 124.8   |
| Bbr_1394 | prfA  | 346.7   | 314.1   | 260.4   | 227.9    | 164.9   | 72.3    | 216.7   | 155.9   | 606.4   | 915.5   | 165.5   | 249.9   | 296.8   |
| Bbr_1395 |       | 1036.7  | 983.6   | 891.4   | 884.0    | 1026.7  | 1345.5  | 528.5   | 1324.5  | 2056.7  | 2562.1  | 1797.8  | 716.4   | 1144.2  |
| Bbr_1396 | fmt   | 339.8   | 318.8   | 288.0   | 223.2    | 316.3   | 226.6   | 418.9   | 445.8   | 1272.9  | 2076.4  | 659.0   | 473.4   | 549.2   |
| Bbr_1397 | livD  | 4145.4  | 3864.8  | 3521.6  | 2656.2   | 2280.2  | 609.6   | 2419.7  | 687.8   | 2455.4  | 3290.8  | 2995.5  | 1763.0  | 2969.6  |
| Bbr_1398 | rpoZ  | 6085.6  | 6630.1  | 5383.5  | 5669.3   | 3635.1  | 4124.5  | 3154.4  | 1821.9  | 7342.4  | 6546.8  | 5980.2  | 3514.9  | 5263.5  |
| Bbr_1399 | metK  | 4172.4  | 4999.4  | 3666.3  | 4972.4   | 3109.1  | 5463.3  | 2734.7  | 3157.0  | 2766.4  | 5571.7  | 2733.0  | 2561.9  | 3197.0  |
| Bbr_1400 |       | 990.9   | 880.5   | 705.1   | 705.1    | 710.9   | 878.7   | 791.0   | 1202.8  | 2155.4  | 1514.6  | 1236.9  | 1267.7  | 1128.4  |
| Bbr_1401 |       | 147.0   | 154.4   | 89.3    | 105.9    | 196.7   | 478.2   | 146.7   | 663.2   | 983.2   | 741.2   | 48.1    | 264.3   | 268.5   |
| Bbr_1402 |       | 116.4   | 97.0    | 82.0    | 105.2    | 145.2   | 158.0   | 158.3   | 122.6   | 314.1   | 452.0   | 27.4    | 35.1    | 191.2   |
| Bbr_1403 |       | 1836.9  | 2019.5  | 1566.1  | 2102.8   | 2950.5  | 6962.4  | 2082.5  | 8178.5  | 3511.8  | 1163.3  | 441.4   | 1053.5  | 2064.8  |

|          |       |         |         |         |         |         |         |         |         |         |         |         |         |         |
|----------|-------|---------|---------|---------|---------|---------|---------|---------|---------|---------|---------|---------|---------|---------|
| Bbr_1404 |       | 1109.5  | 761.0   | 1072.1  | 908.9   | 1131.1  | 1454.6  | 1179.1  | 2360.3  | 645.7   | 743.8   | 377.0   | 607.6   | 919.1   |
| Bbr_1405 | cas2  | 597.3   | 300.7   | 447.8   | 168.5   | 296.0   | 179.6   | 374.1   | 557.0   | 1035.1  | 769.7   | 425.1   | 425.1   | 543.5   |
| Bbr_1406 | cas1  | 1017.5  | 489.2   | 868.3   | 249.8   | 596.2   | 330.8   | 730.1   | 507.8   | 2247.6  | 861.7   | 1064.9  | 719.2   | 1087.4  |
| Bbr_1407 | cas4  | 1411.1  | 656.0   | 1315.0  | 361.0   | 1074.7  | 164.8   | 2127.6  | 362.6   | 2127.6  | 982.3   | 1381.0  | 714.4   | 1354.7  |
| Bbr_1408 |       | 8566.0  | 4010.2  | 7990.2  | 1993.1  | 9862.4  | 306.0   | 6877.2  | 824.0   | 7653.4  | 2083.4  | 8577.8  | 3106.5  | 8237.8  |
| Bbr_1409 |       | 4633.6  | 2523.3  | 4712.4  | 1402.2  | 2609.7  | 251.1   | 2844.8  | 427.0   | 5029.7  | 1467.6  | 5322.6  | 1851.5  | 4192.0  |
| Bbr_1410 |       | 3183.6  | 2198.4  | 2920.7  | 1224.4  | 2920.7  | 471.1   | 2480.8  | 681.6   | 3445.6  | 1336.1  | 2540.1  | 1255.1  | 2764.0  |
| Bbr_1411 | cas3  | 2677.3  | 2054.7  | 2487.7  | 1334.5  | 2292.6  | 703.8   | 3189.6  | 6113.4  | 2407.9  | 1232.7  | 1639.7  | 827.1   | 2449.1  |
| Bbr_1414 | ileS  | 1977.9  | 2762.0  | 1803.6  | 4445.9  | 1454.0  | 2564.6  | 1437.6  | 897.9   | 1496.0  | 1884.5  | 2531.3  | 1915.7  | 1783.4  |
| Bbr_1415 | rbsK2 | 255.3   | 191.4   | 207.1   | 200.5   | 139.0   | 890.9   | 156.4   | 1053.8  | 1127.2  | 840.1   | 195.0   | 563.3   | 346.7   |
| Bbr_1416 | rbsD1 | 473.3   | 276.5   | 441.9   | 236.9   | 258.3   | 952.2   | 258.3   | 819.8   | 988.1   | 696.5   | 264.3   | 953.4   | 443.8   |
| Bbr_1417 | rbsB1 | 459.4   | 194.7   | 364.7   | 297.7   | 222.6   | 61.2    | 267.5   | 102.0   | 504.0   | 315.4   | 294.9   | 111.2   | 352.2   |
| Bbr_1418 | rbsC1 | 230.1   | 121.5   | 201.7   | 201.7   | 163.3   | 66.1    | 238.2   | 114.0   | 690.5   | 169.7   | 134.2   | 71.4    | 279.7   |
| Bbr_1419 | rbsA1 | 363.5   | 199.4   | 309.9   | 95.7    | 207.3   | 192.3   | 232.0   | 238.6   | 468.4   | 216.9   | 150.7   | 138.7   | 288.6   |
| Bbr_1420 |       | 318.3   | 240.3   | 256.9   | 126.5   | 175.2   | 138.2   | 216.0   | 113.5   | 1492.7  | 650.9   | 227.6   | 113.5   | 447.8   |
| Bbr_1421 |       | 378.7   | 288.7   | 338.1   | 151.8   | 228.4   | 99.8    | 262.8   | 157.6   | 295.8   | 206.0   | 207.6   | 69.1    | 285.2   |
| Bbr_1422 | rbsK3 | 381.9   | 366.6   | 329.5   | 193.7   | 165.4   | 162.9   | 195.5   | 263.6   | 650.8   | 299.4   | 146.1   | 85.5    | 311.5   |
| Bbr_1423 | bdhA  | 203.4   | 208.4   | 190.0   | 108.5   | 101.4   | 78.1    | 131.5   | 101.1   | 549.1   | 229.0   | 130.2   | 75.0    | 217.6   |
| Bbr_1424 | gph   | 501.8   | 481.8   | 411.7   | 161.7   | 261.7   | 38.4    | 323.1   | 182.1   | 766.0   | 232.1   | 336.6   | 137.7   | 433.5   |
| Bbr_1425 | iumH2 | 1560.2  | 1764.8  | 1352.0  | 581.0   | 647.7   | 125.4   | 772.1   | 153.8   | 912.5   | 268.4   | 558.3   | 192.9   | 967.1   |
| Bbr_1426 |       | 829.4   | 874.9   | 674.5   | 484.5   | 554.6   | 494.4   | 684.2   | 1039.2  | 506.9   | 286.9   | 257.9   | 108.9   | 584.6   |
| Bbr_1427 | trpF  | 560.3   | 645.2   | 451.5   | 220.7   | 260.2   | 131.2   | 284.7   | 339.5   | 695.0   | 266.1   | 248.4   | 87.5    | 416.7   |
| Bbr_1428 | CbiO1 | 401.4   | 471.6   | 366.9   | 201.6   | 221.4   | 83.9    | 282.4   | 98.4    | 821.7   | 292.2   | 198.7   | 83.8    | 382.1   |
| Bbr_1429 | cblO2 | 419.8   | 513.5   | 340.1   | 221.3   | 199.8   | 159.1   | 240.5   | 174.0   | 872.8   | 377.1   | 183.9   | 112.2   | 376.1   |
| Bbr_1430 | cblQ  | 624.5   | 744.4   | 552.1   | 422.1   | 521.8   | 354.2   | 716.7   | 705.3   | 1145.1  | 430.1   | 269.5   | 179.4   | 638.3   |
| Bbr_1431 |       | 555.5   | 629.1   | 446.7   | 263.8   | 522.5   | 353.4   | 596.7   | 1111.9  | 932.8   | 470.7   | 82.6    | 112.5   | 522.8   |
| Bbr_1432 |       | 515.3   | 560.2   | 444.2   | 413.8   | 279.9   | 413.3   | 302.0   | 343.8   | 1495.4  | 830.3   | 386.2   | 646.9   | 570.5   |
| Bbr_1433 |       | 296.3   | 456.9   | 241.3   | 453.9   | 241.3   | 438.4   | 631.8   | 238.3   | 940.1   | 637.5   | 560.2   | 474.9   | 419.0   |
| Bbr_1434 |       | 189.1   | 360.8   | 186.5   | 590.8   | 375.0   | 1201.8  | 414.7   | 993.6   | 488.2   | 398.2   | 340.7   | 231.9   | 332.4   |
| Bbr_1435 |       | 495.9   | 791.4   | 428.3   | 1129.0  | 322.1   | 7172.3  | 309.3   | 8781.8  | 1312.7  | 722.8   | 467.4   | 628.1   | 556.0   |
| Bbr_1437 |       | 4594.6  | 3353.9  | 4206.2  | 3591.1  | 5107.2  | 7152.2  | 5871.7  | 43804.8 | 5628.7  | 8636.2  | 2340.1  | 2786.9  | 4624.7  |
| Bbr_1438 |       | 729.1   | 446.7   | 635.3   | 336.3   | 504.1   | 134.9   | 662.9   | 187.9   | 651.5   | 517.5   | 177.0   | 115.6   | 560.0   |
| Bbr_1439 |       | 1290.4  | 900.9   | 1076.2  | 645.9   | 746.7   | 1392.5  | 729.1   | 796.9   | 1280.9  | 1843.2  | 555.4   | 366.5   | 946.4   |
| Bbr_1440 |       | 717.2   | 606.0   | 607.7   | 507.2   | 438.9   | 751.4   | 541.5   | 2025.4  | 768.7   | 1735.2  | 359.6   | 273.7   | 572.3   |
| Bbr_1441 |       | 826.7   | 781.6   | 781.6   | 464.8   | 464.8   | 105.0   | 97.9    | 228.4   | 234.4   | 274.4   | 165.4   | 108.2   | 104.1   |
| Bbr_1442 | bgI2  | 1124.9  | 917.0   | 1027.7  | 900.9   | 1108.4  | 1566.3  | 1273.9  | 2878.3  | 771.6   | 1030.8  | 1187.2  | 1059.1  | 1082.3  |
| Bbr_1443 |       | 478.1   | 402.2   | 383.0   | 307.5   | 245.7   | 189.4   | 317.8   | 300.4   | 1326.9  | 843.1   | 278.6   | 328.4   | 505.0   |
| Bbr_1444 | gshA  | 1576.2  | 1008.9  | 1415.2  | 790.5   | 1068.5  | 175.8   | 1382.6  | 229.0   | 1379.0  | 2495.9  | 752.7   | 393.3   | 1262.4  |
| Bbr_1445 | nrdG  | 2460.9  | 3055.2  | 2110.4  | 4088.3  | 1278.4  | 376.5   | 1457.7  | 354.7   | 3386.2  | 5691.2  | 1278.6  | 781.4   | 1995.4  |
| Bbr_1446 |       | 790.8   | 514.6   | 676.4   | 416.4   | 683.7   | 248.6   | 1103.5  | 362.8   | 1015.1  | 1118.7  | 697.7   | 1893.9  | 827.9   |
| Bbr_1447 | nrdD  | 2641.2  | 1997.0  | 2479.6  | 1712.1  | 1587.7  | 649.7   | 1773.7  | 513.6   | 2409.7  | 3292.6  | 3416.8  | 2482.0  | 2384.8  |
| Bbr_1448 | xseA  | 1253.1  | 1689.0  | 1148.8  | 1148.8  | 952.7   | 1148.8  | 952.7   | 357.1   | 1939.8  | 1164.2  | 1164.2  | 1130.4  | 1392.0  |
| Bbr_1449 | xseB  | 1857.3  | 1895.7  | 1738.1  | 1862.0  | 949.2   | 620.2   | 981.7   | 832.4   | 2236.5  | 1733.1  | 1804.2  | 983.3   | 1594.5  |
| Bbr_1450 |       | 1610.8  | 1632.3  | 1292.9  | 1207.3  | 1056.2  | 266.8   | 380.2   | 380.2   | 2180.9  | 1967.2  | 1490.0  | 870.0   | 1417.2  |
| Bbr_1451 |       | 35.9    | 50.3    | 23.2    | 47.0    | 29.9    | 88.9    | 48.1    | 410.5   | 764.4   | 747.6   | 118.5   | 32.7    | 170.0   |
| Bbr_1452 |       | 244.8   | 250.9   | 203.4   | 159.1   | 207.5   | 162.5   | 266.2   | 463.4   | 1192.8  | 518.8   | 1134.7  | 127.8   | 373.8   |
| Bbr_1453 |       | 381.8   | 410.8   | 293.7   | 214.8   | 272.2   | 391.3   | 271.8   | 525.2   | 1072.5  | 846.3   | 248.4   | 886.5   | 413.8   |
| Bbr_1454 |       | 540.0   | 531.3   | 463.9   | 504.5   | 262.3   | 322.0   | 313.4   | 574.8   | 2426.5  | 1110.8  | 545.9   | 492.3   | 758.7   |
| Bbr_1455 | ppx   | 1179.2  | 1089.7  | 960.5   | 752.6   | 899.0   | 456.1   | 1060.4  | 913.7   | 1142.1  | 914.4   | 840.6   | 376.5   | 1011.8  |
| Bbr_1456 |       | 1337.4  | 1305.3  | 1055.9  | 877.9   | 751.7   | 493.9   | 899.6   | 283.8   | 2044.4  | 1737.0  | 1802.8  | 395.6   | 1315.3  |
| Bbr_1457 |       | 1680.3  | 1890.3  | 1436.0  | 584.6   | 796.5   | 388.0   | 266.8   | 2478.7  | 1852.7  | 1432.8  | 789.0   | 1444.6  | 1444.6  |
| Bbr_1458 | vsr   | 561.2   | 626.7   | 474.3   | 474.2   | 289.3   | 364.5   | 339.4   | 1082.1  | 1133.8  | 690.1   | 437.7   | 266.6   | 539.3   |
| Bbr_1459 |       | 124.2   | 123.4   | 108.1   | 108.1   | 70.2    | 114.6   | 168.1   | 61.5    | 1124.8  | 599.5   | 165.0   | 90.1    | 300.8   |
| Bbr_1460 |       | 591.9   | 566.4   | 472.6   | 589.8   | 649.4   | 5433.7  | 795.8   | 45166.7 | 1649.6  | 2848.3  | 419.0   | 1948.4  | 763.0   |
| Bbr_1461 | dapD  | 1609.8  | 1560.9  | 1365.8  | 1269.2  | 1337.7  | 640.8   | 1462.7  | 1059.4  | 934.0   | 1936.6  | 1105.5  | 414.5   | 1302.6  |
| Bbr_1462 | gIIA  | 292.7   | 321.4   | 272.9   | 272.9   | 272.9   | 151.6   | 276.3   | 157.0   | 721.9   | 1370.5  | 350.0   | 1265.7  | 350.9   |
| Bbr_1463 | map   | 12453.1 | 12833.3 | 12257.7 | 13876.6 | 23075.1 | 8303.8  | 20715.2 | 18120.4 | 22023.1 | 19682.5 | 32406.7 | 28519.7 | 20488.5 |
| Bbr_1464 |       | 8880.1  | 10915.3 | 8175.8  | 8175.8  | 8479.4  | 8140.7  | 6923.3  | 11839.7 | 19180.0 | 20775.2 | 36819.3 | 26402.6 | 14698.0 |
| Bbr_1465 | pepO  | 2602.6  | 2108.3  | 2526.3  | 2233.9  | 1408.3  | 324.1   | 1650.5  | 350.8   | 3391.5  | 3554.4  | 4602.4  | 2564.4  | 2696.9  |
| Bbr_1466 |       | 58.6    | 47.4    | 40.4    | 34.9    | 74.1    | 52.7    | 66.1    | 251.3   | 614.7   | 788.4   | 39.7    | 80.5    | 148.9   |
| Bbr_1467 | proS  | 2482.6  | 3200.4  | 2085.9  | 2920.6  | 1839.6  | 672.4   | 2470.8  | 882.5   | 2509.6  | 3333.3  | 2563.8  | 1478.5  | 2325.4  |
| Bbr_1468 | pIIA2 | 35.1    | 34.1    | 27.0    | 29.9    | 37.2    | 82.2    | 52.4    | 347.6   | 704.5   | 437.3   | 36.0    | 350.5   | 148.7   |
| Bbr_1470 |       | 448.0   | 402.1   | 343.8   | 282.6   | 212.1   | 137.8   | 274.1   | 151.4   | 830.2   | 657.8   | 526.1   | 725.3   | 439.1   |
| Bbr_1471 | orn   | 4193.9  | 4057.9  | 3673.8  | 3114.0  | 3113.8  | 3673.8  | 3113.8  | 3293.8  | 3293.8  | 3381.1  | 3381.1  | 2297.4  | 3469.4  |
| Bbr_1472 | guaB  | 7801.7  | 7573.9  | 7137.5  | 5206.0  | 4067.5  | 1698.2  | 3739.3  | 2068.0  | 4374.5  | 4033.4  | 9637.8  | 6502.7  | 6126.4  |
| Bbr_1473 | rfe   | 777.4   | 739.6   | 625.4   | 557.4   | 375.5   | 49.3    | 466.1   | 80.3    | 1258.9  | 1375.1  | 866.6   | 930.1   | 728.3   |
| Bbr_1474 |       | 1538.8  | 1595.4  | 1240.1  | 1273.1  | 1063.7  | 461.0   | 895.7   | 518.4   | 1868.7  | 2009.9  | 1383.2  | 962.0   | 1331.7  |
| Bbr_1475 |       | 562.7   | 784.7   | 472.9   | 616.0   | 270.7   | 491.7   | 303.8   | 681.3   | 661.8   | 472.2   | 1217.9  | 696.4   | 581.6   |
| Bbr_1476 |       | 622.8   | 870.5   | 557.9   | 682.5   | 482.3   | 474.7   | 632.2   | 980.8   | 1233.0  | 564.4   | 1007.8  | 1820.4  | 891.4   |
| Bbr_1477 |       | 1025.7  | 1427.7  | 876.2   | 996.1   | 559.9   | 318.0   | 692.2   | 378.4   | 1238.2  | 610.3   | 1734.9  | 989.4   | 1021.2  |
| Bbr_1478 |       | 974.0   | 974.0   | 742.6   | 760.7   | 437.8   | 422.6   | 437.8   | 207.3   | 150.7   | 421.7   | 1775.9  | 832.7   | 945.8   |
| Bbr_1479 |       | 2164.8  | 3221.0  | 1774.7  | 1817.2  | 873.7   | 207.3   | 1696.0  | 207.3   | 1696.0  | 749.6   | 390.0   | 1886.5  | 1886.5  |
| Bbr_1480 | hemK  | 561.4   | 592.6   | 468.7   | 730.7   | 343.8   | 566.1   | 417.4   | 860.4   | 959.2   | 1046.6  | 432.0   | 717.7   | 530.4   |
| Bbr_1481 | prfA  | 2197.9  | 2245.3  | 1591.1  | 2028.2  | 3233.7  | 2206.1  | 1925.8  | 2451.0  | 2437.6  | 2437.6  | 1967.3  | 1646.5  | 2340.8  |
| Bbr_1482 | rpmE2 | 21937.0 | 19216.3 | 20596.3 | 25031.6 | 17257.3 | 45904.9 | 18815.1 | 47064.0 | 40020.9 | 38555.0 | 32613.6 | 15965.6 | 25206.7 |
| Bbr_1483 |       | 99.9    | 103.3   | 88.5    | 110.2   | 162.4   | 696.6   | 162.4   | 2134.2  | 2197.1  | 1249.4  | 96.4    | 400.4   | 459.1   |
| Bbr_1484 |       | 282.4   | 211.9   | 249.8   | 193.5   | 244.7   | 390.8   | 297.2   | 628.2   | 780.7   | 497.3   | 156.6   | 363.3   | 335.2   |
| Bbr_1485 | fms   | 1111.7  | 1052.9  | 900.1   | 973.8   | 1077.6  | 1849.8  | 1107.6  | 1645.5  | 1645.5  | 1546.8  | 450.5   | 421.2   | 331.3   |
| Bbr_1486 | dkg   | 3330.1  | 3115.1  | 2906.5  | 2272.4  | 1942.5  | 4131.1  | 1782.5  | 3036.4  | 3548.5  | 2922.6  | 1232.3  | 803.5   | 2457.1  |

|          |       |         |         |         |        |         |         |         |        |         |         |         |         |         |
|----------|-------|---------|---------|---------|--------|---------|---------|---------|--------|---------|---------|---------|---------|---------|
| Bbr_1487 |       | 128.0   | 176.9   | 114.5   | 228.8  | 97.6    | 368.8   | 134.3   | 419.6  | 456.9   | 338.3   | 141.6   | 295.0   | 178.8   |
| Bbr_1488 | glk   | 2148.2  | 2186.9  | 2066.7  | 2256.5 | 1897.3  | 2256.5  | 1897.3  | 2256.5 | 1897.3  | 1444.4  | 2669.8  | 1482.0  | 2008.1  |
| Bbr_1489 |       | 2780.1  | 2217.1  | 2313.3  | 2032.1 | 1484.6  | 859.1   | 1590.9  | 1280.3 | 1636.4  | 2426.3  | 1694.6  | 1142.1  | 1916.6  |
| Bbr_1490 | tesB  | 2837.0  | 2969.0  | 3020.5  | 3928.6 | 3020.5  | 4086.7  | 3396.7  | 3027.2 | 3514.3  | 5042.2  | 3254.3  | 3188.0  | 3084.8  |
| Bbr_1491 |       | 1663.5  | 1833.3  | 1456.8  | 1863.5 | 929.5   | 1391.2  | 912.3   | 655.7  | 1563.9  | 1773.7  | 862.5   | 795.8   | 1231.4  |
| Bbr_1492 | suID  | 1326.9  | 1003.8  | 151.8   | 1163.1 | 778.1   | 1834.1  | 103.0   | 1875.9 | 875.3   | 4589.5  | 749.2   | 1163.4  | 1097.3  |
| Bbr_1493 | folP  | 1229.5  | 909.1   | 1052.1  | 1052.1 | 850.1   | 1018.7  | 974.6   | 1018.7 | 1103.5  | 3223.1  | 686.0   | 1052.5  | 1052.5  |
| Bbr_1494 | folE  | 1478.7  | 1071.5  | 1324.3  | 939.9  | 899.7   | 743.6   | 996.2   | 1257.3 | 1500.3  | 4638.2  | 1082.7  | 1482.5  | 1213.7  |
| Bbr_1495 | ftsH  | 4169.8  | 3119.3  | 3700.0  | 3040.1 | 2547.7  | 1809.5  | 2356.4  | 1526.5 | 2655.4  | 5548.9  | 2120.5  | 3044.2  | 2925.0  |
| Bbr_1496 | hprT  | 10007.5 | 8060.8  | 10380.2 | 9871.5 | 11059.8 | 4020.4  | 9115.1  | 2226.7 | 8405.9  | 29938.0 | 5756.9  | 5335.7  | 9120.9  |
| Bbr_1497 | tlS   | 3727.4  | 3392.5  | 3059.6  | 3570.8 | 2772.4  | 4409.3  | 2874.3  | 5139.1 | 4112.9  | 5963.5  | 2305.3  | 1393.9  | 3142.0  |
| Bbr_1498 |       | 996.1   | 657.3   | 859.0   | 511.9  | 577.5   | 549.4   | 620.6   | 1142.6 | 1937.7  | 2368.7  | 927.9   | 1046.2  | 986.5   |
| Bbr_1499 |       | 1048.0  | 752.2   | 885.0   | 570.0  | 510.7   | 220.7   | 583.8   | 315.3  | 1804.1  | 3403.5  | 1189.7  | 842.9   | 1003.6  |
| Bbr_1500 |       | 1270.3  | 632.9   | 1170.1  | 507.6  | 980.8   | 307.2   | 1266.0  | 590.4  | 770.8   | 715.9   | 178.6   | 401.2   | 939.4   |
| Bbr_1501 |       | 1928.1  | 1027.4  | 1735.3  | 807.0  | 1946.2  | 562.2   | 2264.0  | 1187.0 | 1136.8  | 1057.3  | 314.3   | 1117.4  | 1553.8  |
| Bbr_1502 |       | 1616.7  | 1518.8  | 1420.9  | 1131.9 | 1262.7  | 88.4    | 1605.2  | 209.5  | 1349.7  | 1200.0  | 1279.6  | 1422.5  | 1422.5  |
| Bbr_1503 |       | 4128.7  | 4272.3  | 3731.2  | 3557.9 | 2370.5  | 823.6   | 2616.5  | 1067.9 | 4681.2  | 3031.8  | 2964.8  | 2937.5  | 3415.5  |
| Bbr_1504 |       | 860.1   | 1151.7  | 744.8   | 1197.2 | 804.9   | 588.7   | 804.9   | 558.9  | 1534.7  | 2463.1  | 763.1   | 197.7   | 882.7   |
| Bbr_1505 | fucO  | 18581.6 | 10069.9 | 14667.2 | 2540.0 | 13720.0 | 4484.3  | 11848.4 | 2431.9 | 9977.8  | 6701.4  | 15660.0 | 9491.5  | 14075.8 |
| Bbr_1506 |       | 1336.5  | 1177.9  | 1187.8  | 1302.5 | 743.5   | 1895.9  | 741.1   | 613.4  | 2788.6  | 3098.8  | 1223.3  | 1024.4  | 1336.8  |
| Bbr_1507 |       | 698.6   | 597.6   | 555.8   | 493.2  | 313.4   | 203.3   | 371.3   | 153.3  | 1644.8  | 2103.8  | 948.9   | 1438.6  | 755.5   |
| Bbr_1508 |       | 525.1   | 429.5   | 479.2   | 575.3  | 373.3   | 2082.2  | 417.2   | 5571.2 | 637.5   | 1351.6  | 406.8   | 3137.5  | 456.5   |
| Bbr_1509 |       | 28.3    | 26.1    | 24.0    | 23.9   | 25.5    | 158.4   | 296.9   | 87.0   | 254.1   | 254.1   | 45.8    | 1134.4  | 40.7    |
| Bbr_1510 |       | 109.4   | 86.8    | 103.1   | 76.8   | 85.4    | 178.0   | 102.4   | 518.6  | 498.5   | 567.0   | 186.6   | 1366.5  | 180.9   |
| Bbr_1513 | parA2 | 169.9   | 148.0   | 129.5   | 116.0  | 129.4   | 217.1   | 140.5   | 251.2  | 641.3   | 461.6   | 47.6    | 231.3   | 209.7   |
| Bbr_1514 |       | 115.9   | 69.9    | 96.0    | 52.5   | 78.7    | 88.6    | 111.9   | 263.2  | 632.4   | 457.7   | 39.9    | 213.6   | 179.1   |
| Bbr_1515 |       | 55.2    | 63.2    | 39.7    | 41.3   | 37.2    | 107.2   | 56.1    | 204.5  | 666.9   | 436.2   | 92.1    | 147.8   | 147.8   |
| Bbr_1516 |       | 122.4   | 122.5   | 122.5   | 91.2   | 145.5   | 91.2    | 145.5   | 91.2   | 86.4    | 86.4    | 541.3   | 265.9   | 265.9   |
| Bbr_1517 | serB2 | 611.9   | 585.3   | 592.0   | 586.5  | 1148.6  | 888.2   | 1163.9  | 3729.5 | 1337.9  | 2314.3  | 854.0   | 882.8   | 951.4   |
| Bbr_1518 |       | 146.4   | 133.6   | 101.2   | 111.2  | 142.7   | 183.9   | 843.5   | 843.5  | 825.9   | 483.7   | 51.7    | 59.1    | 242.8   |
| Bbr_1519 |       | 440.2   | 427.5   | 363.4   | 458.8  | 211.0   | 631.3   | 232.1   | 704.7  | 892.4   | 1134.1  | 220.0   | 331.5   | 393.2   |
| Bbr_1520 | pacB  | 285.7   | 301.6   | 237.7   | 185.4  | 185.4   | 58.1    | 256.1   | 135.5  | 515.2   | 302.5   | 232.4   | 240.0   | 285.4   |
| Bbr_1521 |       | 97.5    | 114.7   | 85.8    | 60.3   | 90.6    | 33.8    | 124.5   | 60.1   | 136.2   | 284.1   | 110.9   | 118.6   | 150.9   |
| Bbr_1522 |       | 230.3   | 259.1   | 200.8   | 374.0  | 212.2   | 1157.9  | 236.1   | 1491.5 | 1341.0  | 1377.8  | 144.7   | 482.7   | 394.2   |
| Bbr_1523 |       | 1585.8  | 2246.2  | 1344.2  | 4502.3 | 3006.6  | 16088.2 | 3006.6  | 5876.7 | 35296.4 | 12596.4 | 9527.4  | 2319.0  | 2319.0  |
| Bbr_1524 |       | 1077.4  | 1426.1  | 1012.0  | 2333.1 | 1124.9  | 4485.3  | 1071.2  | 5624.1 | 1817.0  | 4636.2  | 1020.0  | 12614.4 | 1187.1  |
| Bbr_1525 |       | 711.3   | 964.9   | 604.9   | 1190.3 | 689.0   | 470.7   | 951.0   | 1110.0 | 2001.9  | 2423.7  | 482.2   | 3013.8  | 906.7   |
| Bbr_1527 |       | 251.6   | 236.1   | 215.2   | 252.8  | 308.7   | 449.2   | 298.6   | 874.6  | 596.7   | 674.8   | 89.0    | 169.6   | 293.3   |
| Bbr_1528 |       | 102.8   | 89.5    | 81.9    | 87.3   | 87.2    | 169.4   | 99.4    | 356.1  | 607.4   | 590.6   | 43.7    | 128.7   | 170.4   |
| Bbr_1529 |       | 191.7   | 151.5   | 155.9   | 152.4  | 181.0   | 232.0   | 250.8   | 1011.8 | 996.3   | 684.4   | 71.0    | 154.2   | 307.8   |
| Bbr_1530 |       | 66.9    | 43.4    | 52.9    | 31.2   | 90.4    | 56.8    | 100.0   | 241.2  | 524.2   | 441.9   | 9.9     | 56.5    | 140.7   |
| Bbr_1531 |       | 56.2    | 50.3    | 46.7    | 46.1   | 60.5    | 46.7    | 60.5    | 53.2   | 739.0   | 563.7   | 146.6   | 51.4    | 169.7   |
| Bbr_1532 |       | 1327.7  | 1207.2  | 1032.3  | 1222.0 | 1442.3  | 4883.4  | 1449.8  | 7589.2 | 2353.3  | 4003.9  | 953.0   | 795.3   | 1426.4  |
| Bbr_1533 |       | 819.7   | 775.4   | 790.6   | 925.3  | 542.6   | 1425.3  | 523.7   | 733.8  | 2196.9  | 1325.6  | 594.9   | 875.0   | 911.4   |
| Bbr_1534 | rep   | 6243.7  | 5370.5  | 5942.3  | 3597.8 | 3248.6  | 650.0   | 3098.0  | 630.3  | 5095.0  | 1819.1  | 4341.8  | 751.4   | 4661.6  |
| Bbr_1535 |       | 4079.5  | 4445.5  | 4034.7  | 3796.1 | 4561.6  | 1019.0  | 5059.2  | 1777.3 | 3343.2  | 2553.6  | 2340.6  | 755.2   | 3903.1  |
| Bbr_1536 |       | 44.9    | 39.5    | 42.2    | 45.6   | 78.4    | 31.6    | 81.1    | 138.5  | 1344.7  | 1414.0  | 10.0    | 5.2     | 266.9   |
| Bbr_1537 |       | 181.2   | 180.8   | 132.0   | 160.4  | 248.9   | 487.0   | 283.9   | 653.0  | 454.8   | 491.4   | 55.4    | 65.6    | 226.0   |
| Bbr_1538 |       | 634.0   | 615.8   | 530.0   | 499.3  | 442.7   | 829.2   | 571.5   | 1721.7 | 1223.3  | 1202.4  | 798.1   | 737.1   | 699.9   |
| Bbr_1539 |       | 89.5    | 77.4    | 85.2    | 97.7   | 97.2    | 415.0   | 102.5   | 573.7  | 675.7   | 556.7   | 42.1    | 30.6    | 182.0   |
| Bbr_1542 |       | 24.8    | 31.2    | 29.1    | 21.2   | 51.2    | 41.6    | 50.5    | 176.8  | 305.3   | 267.9   | 13.0    | 6.3     | 77.7    |
| Bbr_1543 |       | 18.9    | 16.1    | 16.7    | 23.6   | 30.0    | 23.0    | 28.9    | 120.2  | 359.5   | 341.7   | 9.7     | 3.4     | 77.3    |
| Bbr_1544 |       | 188.9   | 168.3   | 124.5   | 141.3  | 109.6   | 207.5   | 151.8   | 396.9  | 562.4   | 485.8   | 1711.0  | 1146.2  | 474.7   |
| Bbr_1545 |       | 103.3   | 97.9    | 75.8    | 93.5   | 152.6   | 152.6   | 166.4   | 576.9  | 380.6   | 286.8   | 19.3    | 10.9    | 149.7   |
| Bbr_1546 | parB1 | 141.9   | 108.5   | 136.0   | 116.4  | 134.6   | 165.7   | 167.8   | 619.4  | 399.4   | 294.4   | 46.5    | 29.7    | 171.0   |
| Bbr_1547 |       | 21.8    | 21.0    | 23.1    | 30.6   | 21.6    | 43.2    | 29.1    | 107.4  | 261.5   | 232.2   | 8.4     | 13.3    | 60.9    |
| Bbr_1548 |       | 30.7    | 25.7    | 17.8    | 31.9   | 42.8    | 19.2    | 53.3    | 188.9  | 692.6   | 252.1   | 9.5     | 10.9    | 141.1   |
| Bbr_1549 |       | 302.3   | 251.4   | 299.8   | 314.8  | 233.3   | 424.2   | 330.0   | 736.0  | 782.1   | 501.0   | 69.4    | 49.7    | 336.1   |
| Bbr_1550 |       | 272.5   | 225.0   | 241.7   | 261.6  | 236.7   | 465.3   | 261.4   | 798.0  | 662.4   | 634.0   | 98.4    | 73.5    | 295.5   |
| Bbr_1551 | lacS  | 91.9    | 109.1   | 66.7    | 73.1   | 57.5    | 145.8   | 71.4    | 76.7   | 366.9   | 527.8   | 109.9   | 62.1    | 127.4   |
| Bbr_1552 | LacZ6 | 217.2   | 219.9   | 171.4   | 126.7  | 219.5   | 1295.2  | 193.8   | 1045.8 | 790.5   | 543.7   | 142.9   | 113.2   | 289.2   |
| Bbr_1553 |       | 329.0   | 320.7   | 301.8   | 311.1  | 209.1   | 385.9   | 277.1   | 694.7  | 642.7   | 1078.3  | 361.6   | 282.4   | 353.5   |
| Bbr_1554 |       | 1075.0  | 786.7   | 965.9   | 649.5  | 770.7   | 261.2   | 1062.6  | 2093.2 | 791.3   | 462.5   | 3737.4  | 2054.8  | 1620.8  |
| Bbr_1555 |       | 831.6   | 251.3   | 251.3   | 251.3  | 268.7   | 787.1   | 243.0   | 1674.0 | 910.3   | 861.8   | 206.7   | 338.1   | 338.1   |
| Bbr_1556 | nagZ  | 350.0   | 342.6   | 349.7   | 341.1  | 251.5   | 273.2   | 251.5   | 587.6  | 792.9   | 1061.7  | 756.8   | 447.7   | 465.3   |
| Bbr_1558 |       | 14237.4 | 10308.2 | 12394.0 | 4058.4 | 9243.7  | 1502.1  | 9915.1  | 2759.4 | 5723.8  | 1393.5  | 6547.2  | 15530.7 | 9676.9  |
| Bbr_1559 |       | 21137.3 | 13906.9 | 20492.7 | 7195.0 | 16133.0 | 3174.9  | 14889.6 | 4169.1 | 5113.1  | 1476.7  | 8046.3  | 14475.5 | 14302.0 |
| Bbr_1560 |       | 8918.9  | 6053.1  | 8029.1  | 2658.5 | 10841.5 | 482.3   | 12874.7 | 2308.3 | 2468.6  | 948.1   | 3058.0  | 4003.5  | 7698.5  |
| Bbr_1562 | ptpA  | 3464.3  | 3539.3  | 3050.4  | 2951.8 | 1888.2  | 1041.1  | 1899.7  | 718.9  | 5257.2  | 3836.1  | 3457.9  | 3169.6  | 3169.6  |
| Bbr_1563 | dfpA  | 8171.9  | 9091.5  | 6695.8  | 7168.3 | 5921.9  | 3807.0  | 5163.6  | 2655.7 | 5961.3  | 5733.1  | 3130.1  | 1922.8  | 5840.8  |
| Bbr_1564 | thyA  | 6354.4  | 6957.4  | 621.8   | 5728.3 | 4321.3  | 6202.7  | 4869.2  | 826.2  | 5274.8  | 4727.8  | 2170.3  | 3469.3  | 3469.3  |
| Bbr_1565 |       | 6154.3  | 4981.8  | 5285.6  | 3308.7 | 3633.2  | 2068.6  | 3657.6  | 4191.2 | 4390.0  | 3174.6  | 4622.4  | 1574.1  | 4623.9  |
| Bbr_1566 |       | 28869.6 | 16672.5 | 26972.0 | 6883.2 | 27711.3 | 9741.2  | 28094.8 | 7772.4 | 11410.7 | 20106.5 | 12428.1 | 8507.5  | 22247.7 |
| Bbr_1567 |       | 3907.4  | 4263.9  | 3734.3  | 4208.6 | 2692.5  | 743.5   | 2950.0  | 747.1  | 2658.8  | 2967.4  | 2772.6  | 3636.1  | 3119.3  |
| Bbr_1568 |       | 1278.2  | 1050.2  | 1092.7  | 777.5  | 777.3   | 311.6   | 938.2   | 456.5  | 1567.7  | 1934.7  | 1528.3  | 6683.7  | 1197.1  |
| Bbr_1569 |       | 3390.0  | 3159.5  | 2879.4  | 2843.8 | 2471.0  | 1169.9  | 2960.4  | 1358.5 | 3905.1  | 5672.0  | 2439.0  | 18768.2 | 3007.5  |
| Bbr_1570 | serC  | 413.2   | 478.6   | 342.2   | 371.6  | 315.9   | 132.8   | 428.9   | 340.2  | 594.3   | 1132.2  | 366.4   | 482.7   | 410.2   |
| Bbr_1571 |       | 824.0   | 891.2   | 891.2   | 891.2  | 891.2   | 1571.7  | 1571.7  | 1571.7 | 1571.7  | 2341.0  | 264.7   | 2341.0  | 1000.1  |
| Bbr_1572 | senX3 | 628.3   | 599.5   | 527.1   | 406.8  | 324.7   | 222.6   | 361.0   | 319.7  | 1637.1  | 1450.9  | 506.8   | 501.9   | 664.2   |

|          |      |         |         |         |         |         |         |         |         |          |         |         |         |          |         |
|----------|------|---------|---------|---------|---------|---------|---------|---------|---------|----------|---------|---------|---------|----------|---------|
| Bbr_1573 |      | 4156.1  |         |         |         | 2614.1  | 2110.0  | 2040.6  | 2126.5  | 2053.5   | 2872.6  | 2374.4  | 2691.0  | 2062.9   | 2965.2  |
| Bbr_1574 | gpm2 | 2114.2  | 3345.5  | 1548.2  | 1348.1  | 1638.4  | 1348.1  | 1049.1  | 2923.4  | 882.0    | 4058.2  | 2934.0  | 2306.4  | 2348.7   | 1996.3  |
| Bbr_1575 | menA | 1601.6  | 1608.5  | 1377.8  | 1613.0  | 1613.0  | 895.6   | 1072.8  | 1046.7  | 640.6    | 1414.4  | 1808.3  | 895.8   | 1605.0   | 1205.3  |
| Bbr_1576 | lysS | 1920.0  | 2078.5  | 1824.0  | 1824.0  | 1824.0  | 1057.1  | 945.4   | 1195.8  | 487.4    | 1886.4  | 3405.0  | 2250.9  | 1446.5   | 1689.0  |
| Bbr_1577 |      | 148.0   | 243.8   | 122.9   | 238.7   | 95.4    | 238.7   | 95.4    | 151.5   | 123.6    | 75.6    | 743.2   | 721.0   | 173.6    | 234.5   |
| Bbr_1578 |      | 1340.0  | 1376.4  | 1099.7  | 1099.7  | 1099.7  | 241.2   | 241.2   | 696.5   | 346.7    | 941.2   | 1553.8  | 517.5   | 89.1     | 868.9   |
| Bbr_1579 |      | 1448.6  | 1432.3  | 1173.9  | 1030.1  | 1030.1  | 1249.9  | 478.1   | 1674.5  | 1331.7   | 1443.9  | 1874.4  | 633.0   | 148.1    | 1270.8  |
| Bbr_1580 |      | 2407.7  | 2134.7  | 2087.2  | 1967.9  | 1388.2  | 1388.2  | 575.7   | 1433.5  | 426.2    | 4142.8  | 6116.8  | 2635.3  | 6624.5   | 2349.1  |
| Bbr_1581 |      | 15903.4 | 11457.2 | 13100.6 | 7640.0  | 18929.5 | 1442.8  | 13749.3 | 1799.2  | 4662.9   | 1374.0  | 11548.6 | 9924.1  | 12982.4  | 12982.4 |
| Bbr_1582 |      | 18770.1 | 15542.3 | 17509.0 | 11246.9 | 18702.5 | 18702.5 | 1964.0  | 19991.0 | 2477.7   | 9846.2  | 2184.9  | 19502.7 | 15296.2  | 17386.9 |
| Bbr_1583 |      | 5490.4  | 5246.7  | 4766.9  | 4522.5  | 3799.6  | 4766.9  | 1725.4  | 4224.6  | 856.6    | 4820.7  | 2698.8  | 6539.1  | 3979.0   | 4940.2  |
| Bbr_1584 |      | 4091.7  | 3607.7  | 3447.7  | 2881.6  | 3241.6  | 3447.7  | 1240.6  | 3692.7  | 2023.1   | 1348.9  | 1860.1  | 3148.5  | 2508.8   | 3161.8  |
| Bbr_1585 | galE | 12885.1 | 12327.4 | 11949.4 | 6698.8  | 8153.9  | 6698.8  | 5298.6  | 6917.2  | 3097.3   | 10526.4 | 9119.0  | 11620.3 | 15078.2  | 10342.0 |
| Bbr_1586 |      | 1395.9  | 1043.2  | 1263.5  | 945.9   | 815.7   | 1263.5  | 452.0   | 957.3   | 439.6    | 1476.8  | 786.2   | 1697.4  | 1152.2   | 1267.8  |
| Bbr_1587 | lnbP | 2234.4  | 1463.2  | 2035.6  | 1069.7  | 1287.2  | 2035.6  | 577.6   | 1368.5  | 529.2    | 1103.1  | 1387.7  | 3071.6  | 2305.8   | 1850.1  |
| Bbr_1588 |      | 5394.6  | 4565.8  | 4799.9  | 3131.3  | 7963.2  | 4799.9  | 1419.5  | 8697.9  | 2374.9   | 2308.4  | 1762.5  | 4033.6  | 2268.3   | 5532.9  |
| Bbr_1589 |      | 13129.7 | 10170.0 | 12690.8 | 7511.9  | 16854.2 | 6574.9  | 17224.4 | 8842.8  | 6912.5   | 6912.5  | 3112.3  | 13686.0 | 8448.0   | 13416.3 |
| Bbr_1590 |      | 33119.7 | 21318.3 | 33487.1 | 11428.3 | 47694.5 | 16690.4 | 47900.4 | 46566.2 | 14865.7  | 46566.2 | 6776.0  | 35271.1 | 18926.3  | 35389.7 |
| Bbr_1591 | serS | 4412.8  | 4676.5  | 4034.2  | 4810.3  | 3917.7  | 4034.2  | 2177.8  | 3525.4  | 1212.0   | 3903.6  | 4288.3  | 5621.6  | 3467.8   | 4235.9  |
| Bbr_1592 |      | 1153.7  | 1055.4  | 902.7   | 810.7   | 549.1   | 902.7   | 255.3   | 638.3   | 165.0    | 2635.5  | 2915.0  | 1497.0  | 1754.4   | 1229.4  |
| Bbr_1593 |      | 1370.6  | 961.3   | 1178.1  | 336.7   | 685.3   | 1178.1  | 452.0   | 726.4   | 448.8    | 1996.3  | 3034.9  | 1826.4  | 2674.7   | 1297.2  |
| Bbr_1594 | ptsG | 10187.5 | 9562.8  | 9535.3  | 4209.1  | 10802.4 | 4209.1  | 10802.4 | 1062.4  | 6830.9   | 7893.0  | 10297.3 | 11790.5 | 12234.2  | 10111.9 |
| Bbr_1595 | pgm  | 8441.3  | 7743.9  | 8201.7  | 5760.3  | 8421.9  | 8201.7  | 1652.4  | 7045.2  | 2236.0   | 7058.1  | 10468.5 | 11382.3 | 8677.8   | 8518.5  |
| Bbr_1596 |      | 86.0    | 71.2    | 68.1    | 74.5    | 68.9    | 71.2    | 247.2   | 84.4    | 275.0    | 900.1   | 1103.8  | 55.1    | 1844.9   | 210.4   |
| Bbr_1597 |      | 13980.3 | 23397.4 | 15802.8 | 34650.8 | 22132.1 | 34650.8 | 81367.2 | 23762.9 | 105414.7 | 5239.4  | 10332.0 | 12528.9 | 104361.1 | 15574.4 |
| Bbr_1598 |      | 6471.1  | 11759.3 | 6522.4  | 18223.4 | 12230.1 | 6522.4  | 43314.0 | 4149.8  | 7675.8   | 2377.1  | 4478.2  | 4202.8  | 6890.4   | 5992.2  |
| Bbr_1599 | mh   | 694.5   | 844.8   | 671.9   | 1713.3  | 1767.4  | 671.9   | 9485.3  | 332.0   | 709.0    | 1622.4  | 2571.3  | 3088.4  | 21444.6  | 1362.8  |
| Bbr_1600 | rpi  | 2179.3  | 2348.2  | 1878.7  | 2348.2  | 1965.2  | 2348.2  | 7439.2  | 1795.2  | 4831.2   | 3414.7  | 3701.7  | 3498.2  | 8446.6   | 2454.5  |
| Bbr_1601 |      | 14.3    | 22.3    | 11.9    | 29.6    | 50.2    | 22.3    | 455.8   | 25.7    | 69.8     | 293.8   | 544.8   | 61.1    | 414.4    | 76.2    |
| Bbr_1602 |      | 2222.0  | 1888.3  | 2641.5  | 1888.3  | 1965.7  | 2641.5  | 1965.7  | 2099.8  | 1170.4   | 16167.2 | 3571.8  | 2042.4  | 452.4    | 4344.2  |
| Bbr_1603 | radA | 117.1   | 146.7   | 91.3    | 92.7    | 73.4    | 146.7   | 92.5    | 90.5    | 338.0    | 635.6   | 938.5   | 121.5   | 215.8    | 188.2   |
| Bbr_1604 | ribF | 583.5   | 571.6   | 462.4   | 475.4   | 319.2   | 571.6   | 261.8   | 379.9   | 292.7    | 1252.4  | 1798.2  | 714.5   | 476.6    | 618.6   |
| Bbr_1605 | truB | 224.3   | 166.1   | 180.8   | 138.8   | 157.5   | 166.1   | 127.7   | 178.0   | 398.9    | 902.9   | 1458.2  | 366.4   | 503.9    | 331.9   |
| Bbr_1606 | rsfA | 1890.0  | 1304.8  | 1229.3  | 895.6   | 1542.9  | 1229.3  | 972.2   | 1133.8  | 908.7    | 1346.8  | 2333.0  | 1231.9  | 1150.5   | 1395.8  |
| Bbr_1607 | rsfB | 2381.9  | 2815.2  | 2982.6  | 2815.2  | 1863.3  | 2982.6  | 1863.3  | 1863.3  | 1863.3   | 3151.6  | 3315.1  | 3315.1  | 3051.2   | 2737.5  |
| Bbr_1608 | nusA | 1659.6  | 1505.1  | 1427.5  | 1299.7  | 1522.2  | 1427.5  | 4104.2  | 1527.0  | 4229.0   | 2257.8  | 3375.1  | 1763.8  | 1789.1   | 1693.0  |
| Bbr_1609 |      | 292.4   | 368.8   | 255.0   | 404.7   | 182.5   | 255.0   | 209.3   | 288.7   | 861.8    | 955.0   | 365.6   | 220.0   | 357.5    | 357.5   |
| Bbr_1610 |      | 107.2   | 93.1    | 73.7    | 79.6    | 81.8    | 93.1    | 2078.1  | 78.1    | 1841.1   | 718.8   | 676.9   | 83.7    | 687.5    | 190.5   |
| Bbr_1611 |      | 697.8   | 693.9   | 646.6   | 769.6   | 467.7   | 693.9   | 706.9   | 622.2   | 1042.4   | 3046.5  | 2974.5  | 893.9   | 2302.2   | 1062.4  |
| Bbr_1612 |      | 86.3    | 93.7    | 70.0    | 43.8    | 59.6    | 93.7    | 15.5    | 74.7    | 25.3     | 739.8   | 394.6   | 175.3   | 938.2    | 200.0   |
| Bbr_1613 | truA | 453.2   | 513.2   | 352.8   | 459.3   | 252.0   | 453.2   | 449.2   | 303.4   | 370.6    | 754.2   | 696.4   | 332.5   | 4870.5   | 408.9   |
| Bbr_1614 | rpiQ | 4021.9  | 4379.0  | 4379.0  | 4379.0  | 4379.0  | 4379.0  | 4379.0  | 4379.0  | 2152.4   | 5462.9  | 5116.6  | 4916.4  | 4916.4   | 4916.4  |
| Bbr_1615 | rpsA | 15100.9 | 21392.8 | 21590.1 | 22699.0 | 30755.9 | 21590.1 | 30755.9 | 31005.0 | 10831.2  | 14605.3 | 12085.0 | 20925.8 | 33689.0  | 22997.2 |
| Bbr_1616 | rpsK | 28911.3 | 26971.1 | 29569.3 | 26971.1 | 26798.4 | 26971.1 | 18257.5 | 26798.4 | 16870.4  | 21883.4 | 14833.8 | 30634.1 | 39718.3  | 27765.4 |
| Bbr_1617 | rpsM | 24710.3 | 23002.1 | 29087.2 | 24792.0 | 32911.7 | 24792.0 | 19994.7 | 29037.8 | 40539.6  | 23008.2 | 16721.1 | 30558.3 | 43354.0  | 28218.9 |
| Bbr_1618 | rpsJ | 48554.7 | 43116.6 | 60756.4 | 47134.2 | 47831.8 | 43116.6 | 42070.4 | 51278.3 | 126697.8 | 59001.8 | 35240.2 | 63223.9 | 51957.2  | 53230.0 |
| Bbr_1619 | infA | 34855.8 | 33713.6 | 45557.8 | 38524.6 | 85544.1 | 33713.6 | 33005.8 | 68720.5 | 196749.1 | 40163.4 | 27309.5 | 42971.7 | 51262.9  | 52968.9 |
| Bbr_1620 | adk  | 8749.4  | 9459.3  | 7678.7  | 6518.1  | 7074.6  | 7678.7  | 2238.3  | 7886.4  | 2225.6   | 7016.9  | 5470.9  | 11213.5 | 9951.5   | 8239.2  |
| Bbr_1621 | secY | 9411.1  | 8652.6  | 8502.6  | 7654.4  | 9980.0  | 8652.6  | 2611.6  | 9399.0  | 1382.4   | 10212.6 | 7802.2  | 7486.9  | 7145.3   | 9000.4  |
| Bbr_1622 | rpiO | 30904.1 | 35418.6 | 32661.8 | 38854.4 | 32887.6 | 35418.6 | 32972.9 | 26571.3 | 14831.2  | 10625.3 | 12321.4 | 14727.3 | 15928.1  | 24712.9 |
| Bbr_1623 | rpsD | 38260.5 | 41843.5 | 40839.3 | 43028.5 | 35676.1 | 41843.5 | 41230.8 | 35676.1 | 12717.3  | 35188.5 | 36775.0 | 61284.2 | 59204.7  | 44315.6 |
| Bbr_1624 | rpsE | 41475.3 | 44091.3 | 47128.7 | 44725.7 | 37376.5 | 44091.3 | 32809.8 | 30055.7 | 12064.9  | 30200.9 | 32763.9 | 66236.8 | 65228.8  | 42079.0 |
| Bbr_1625 | rpiR | 38113.6 | 39386.6 | 42980.1 | 40975.2 | 30903.0 | 38113.6 | 28191.6 | 22828.8 | 7913.4   | 31045.9 | 29507.6 | 65476.8 | 62891.7  | 38558.0 |
| Bbr_1626 | rpiF | 27162.0 | 30113.2 | 30705.6 | 32703.0 | 30159.8 | 27162.0 | 24146.8 | 29606.9 | 12382.9  | 20109.0 | 21394.6 | 41955.0 | 47335.4  | 29949.7 |
| Bbr_1627 | rpsH | 25398.3 | 28353.7 | 31068.0 | 34255.5 | 22646.8 | 25398.3 | 26172.2 | 20471.7 | 12152.6  | 27939.4 | 27056.1 | 47659.6 | 50926.6  | 29197.3 |
| Bbr_1628 | rpsN | 30321.8 | 33165.6 | 34983.8 | 36604.1 | 28763.7 | 30321.8 | 30563.0 | 28977.7 | 20267.4  | 24511.5 | 25063.3 | 48082.6 | 51594.5  | 32593.5 |
| Bbr_1629 | rpiE | 30443.9 | 32796.1 | 36647.1 | 36647.1 | 36647.1 | 32796.1 | 32472.0 | 60830.5 | 46883.3  | 36503.8 | 33789.8 | 51026.5 | 55018.1  | 43015.5 |
| Bbr_1630 | rpiX | 32437.5 | 35080.8 | 40208.6 | 43789.8 | 39751.6 | 32437.5 | 37951.6 | 28349.2 | 40301.1  | 31039.6 | 31646.3 | 45628.4 | 51828.7  | 34116.3 |
| Bbr_1631 | rpiN | 32492.7 | 35134.7 | 39224.4 | 42362.8 | 38405.3 | 32492.7 | 39547.1 | 40432.6 | 54911.3  | 25426.3 | 27157.0 | 40021.0 | 46005.8  | 36000.4 |
| Bbr_1632 | rpsQ | 28526.1 | 32564.9 | 33498.8 | 39495.7 | 50257.3 | 28526.1 | 32711.9 | 37918.3 | 68021.9  | 29969.0 | 31076.9 | 50022.6 | 54201.7  | 38365.4 |
| Bbr_1633 | rpsC | 24156.3 | 29128.1 | 26814.2 | 32130.5 | 29520.8 | 24156.3 | 18070.5 | 25015.2 | 6043.6   | 20870.2 | 20787.9 | 48647.2 | 51782.6  | 28570.6 |
| Bbr_1634 | rpiP | 21750.9 | 26325.2 | 24287.6 | 31605.0 | 17043.8 | 21750.9 | 18887.9 | 5302.7  | 16922.5  | 17370.7 | 14879.4 | 46563.3 | 24430.0  | 24430.0 |
| Bbr_1635 | rpsC | 15387.3 | 19693.5 | 17675.4 | 25073.3 | 16483.6 | 15387.3 | 13585.0 | 15488.0 | 4539.6   | 9126.4  | 9859.0  | 20882.1 | 26523.3  | 15840.4 |
| Bbr_1636 | rpiV | 12861.0 | 16774.9 | 14256.8 | 11291.2 | 20298.7 | 12861.0 | 11901.2 | 10280.6 | 3856.1   | 8352.4  | 8876.3  | 16580.1 | 21875.0  | 12267.3 |
| Bbr_1637 | rpsS | 20259.2 | 25333.1 | 24099.8 | 32074.5 | 18337.8 | 20259.2 | 18337.8 | 35036.7 | 11817.3  | 20440.4 | 18884.1 | 41037.8 | 34656.4  | 29626.0 |
| Bbr_1638 | rpiB | 27522.5 | 31941.2 | 32396.5 | 39966.4 | 55372.8 | 27522.5 | 23068.7 | 35333.0 | 8503.4   | 22959.6 | 22471.2 | 41418.5 | 48571.1  | 35833.8 |
| Bbr_1639 | rpiW | 24124.8 | 27804.4 | 25317.4 | 31995.5 | 24661.6 | 24124.8 | 24661.6 | 29605.9 | 7870.1   | 18804.4 | 18351.1 | 35375.6 | 38866.7  | 28497.5 |
| Bbr_1640 | rpiD | 22955.2 | 27110.0 | 26435.3 | 32225.1 | 17623.6 | 22955.2 | 23072.9 | 12427.7 | 5319.4   | 22324.5 | 21571.3 | 38554.9 | 43068.2  | 23386.9 |
| Bbr_1641 | rpiC | 30992.2 | 33109.2 | 36688.6 | 41184.9 | 33709.8 | 30992.2 | 33709.8 | 45958.4 | 15948.2  | 22004.7 | 20355.7 | 41168.6 | 43921.4  | 38168.6 |
| Bbr_1642 | rpsJ | 16469.5 | 17498.1 |         |         |         |         |         |         |          |         |         |         |          |         |



|          |       |         |         |         |         |         |         |        |          |         |         |         |         |         |
|----------|-------|---------|---------|---------|---------|---------|---------|--------|----------|---------|---------|---------|---------|---------|
| Bbr_1734 |       | 1591.1  | 1997.3  | 1302.8  | 2350.3  | 1698.3  | 4082.9  | 1403.0 | 1533.6   | 1848.2  | 4014.7  | 1320.1  | 11807.3 | 1527.3  |
| Bbr_1735 | rpmA  | 11080.8 | 10936.0 | 9679.2  | 11192.3 | 7950.9  | 14555.3 | 6739.9 | 12976.2  | 14101.8 | 17557.4 | 11006.4 | 28122.9 | 10093.2 |
| Bbr_1736 | rplU  | 13558.9 | 14671.7 | 13948.9 | 16767.5 | 10169.1 | 19875.9 | 9648.4 | 31206.7  | 23279.6 | 32656.0 | 21131.2 | 49784.6 | 15289.3 |
| Bbr_1737 | rne   | 775.0   | 899.0   | 850.6   | 1181.0  | 563.4   | 472.7   | 685.0  | 174.5    | 2437.0  | 5207.9  | 174.5   | 853.6   | 1027.4  |
| Bbr_1738 | dapE  | 223.4   | 202.0   | 243.6   | 230.8   | 230.8   | 196.5   | 234.4  | 426.0    | 1065.2  | 899.6   | 410.2   | 379.0   | 395.5   |
| Bbr_1739 |       | 643.6   | 502.4   | 524.1   | 514.4   | 408.8   | 239.9   | 553.6  | 258.4    | 999.8   | 959.8   | 634.3   | 692.3   | 754.6   |
| Bbr_1740 | dapA4 | 120.6   | 94.7    | 124.6   | 123.1   | 102.7   | 391.4   | 129.7  | 1398.8   | 956.4   | 350.5   | 168.0   | 210.3   | 267.2   |
| Bbr_1741 |       | 53.8    | 42.3    | 42.2    | 38.0    | 39.9    | 106.1   | 55.8   | 212.9    | 711.4   | 230.4   | 108.3   | 115.5   | 168.6   |
| Bbr_1742 |       | 58.0    | 62.6    | 40.5    | 33.8    | 35.6    | 108.9   | 48.8   | 182.5    | 888.2   | 263.3   | 111.5   | 116.2   | 197.1   |
| Bbr_1743 |       | 109.8   | 71.6    | 86.5    | 51.5    | 61.2    | 244.1   | 76.0   | 348.3    | 918.9   | 340.0   | 298.7   | 1491.1  | 258.5   |
| Bbr_1744 |       | 269.9   | 180.1   | 244.3   | 164.0   | 325.7   | 273.1   | 494.2  | 1117.5   | 1520.6  | 493.8   | 479.0   | 4128.1  | 555.6   |
| Bbr_1745 |       | 437.7   | 495.4   | 387.9   | 433.8   | 294.8   | 480.0   | 357.9  | 502.9    | 1968.4  | 636.9   | 221.4   | 153.0   | 611.3   |
| Bbr_1746 |       | 287.2   | 284.7   | 230.5   | 315.9   | 330.3   | 75.8    | 448.1  | 190.7    | 771.7   | 1200.5  | 520.0   | 346.9   | 431.3   |
| Bbr_1747 |       | 681.1   | 693.1   | 540.9   | 696.8   | 405.7   | 632.9   | 509.4  | 820.1    | 2591.8  | 1982.8  | 941.5   | 754.0   | 945.1   |
| Bbr_1748 |       | 482.4   | 651.5   | 424.9   | 847.5   | 332.8   | 1566.1  | 331.0  | 725.1    | 2336.8  | 926.4   | 489.2   | 972.5   | 732.9   |
| Bbr_1749 |       | 1645.4  | 1560.8  | 1337.3  | 1177.7  | 1156.9  | 475.5   | 1536.7 | 997.4    | 1909.4  | 1672.4  | 1262.4  | 796.2   | 1474.7  |
| Bbr_1750 | thrB  | 2424.8  | 2406.6  | 2232.4  | 2225.6  | 1378.9  | 901.5   | 1503.9 | 471.7    | 2299.3  | 2051.1  | 2335.9  | 1295.9  | 2029.2  |
| Bbr_1751 | thrA  | 4530.2  | 4433.1  | 4298.9  | 3463.7  | 7717.7  | 1735.8  | 8448.5 | 3244.5   | 5110.0  | 4097.6  | 4153.1  | 1591.7  | 5709.7  |
| Bbr_1753 | lysA  | 1697.1  | 1816.7  | 1428.9  | 1388.6  | 804.5   | 340.9   | 830.9  | 379.2    | 2639.5  | 2404.9  | 2662.8  | 2343.8  | 1677.3  |
| Bbr_1754 |       | 1627.3  | 2017.1  | 1545.7  | 2016.6  | 1164.4  | 624.8   | 1428.5 | 795.3    | 2308.9  | 3254.4  | 2554.3  | 2629.7  | 1771.5  |
| Bbr_1755 | argS  | 2570.5  | 2119.2  | 2295.3  | 1550.0  | 1154.9  | 328.8   | 1457.6 | 323.3    | 5946.6  | 17675.4 | 2424.0  | 20810.2 | 2541.5  |
| Bbr_1756 |       | 916.0   | 569.0   | 756.7   | 321.2   | 410.5   | 185.6   | 549.8  | 445.6    | 3134.2  | 5539.0  | 904.7   | 2750.3  | 1112.0  |
| Bbr_1757 | murA  | 8032.6  | 6648.8  | 7544.2  | 7818.0  | 7453.1  | 9679.8  | 6525.8 | 3093.6   | 6371.2  | 7727.9  | 4288.1  | 7455.2  | 6702.5  |
| Bbr_1758 | nox   | 3791.5  | 1357.6  | 3456.6  | 429.1   | 3833.8  | 376.8   | 4490.8 | 1288.6   | 2536.6  | 1441.1  | 2470.6  | 1111.3  | 3430.0  |
| Bbr_1759 |       | 605.9   | 588.8   | 535.3   | 441.7   | 302.5   | 395.7   | 352.1  | 584.2    | 1200.8  | 947.3   | 584.4   | 694.8   | 615.2   |
| Bbr_1760 |       | 359.7   | 380.2   | 319.4   | 303.2   | 343.6   | 162.3   | 494.8  | 344.5    | 1147.6  | 408.9   | 317.3   | 2079.1  | 497.1   |
| Bbr_1761 |       | 384.6   | 424.4   | 825.0   | 2119.1  | 200.2   | 199.9   | 244.6  | 264.4    | 704.7   | 361.2   | 258.9   | 700.4   | 436.3   |
| Bbr_1762 |       | 758.8   | 815.2   | 612.2   | 820.1   | 658.9   | 314.5   | 441.3  | 445.6    | 1211.6  | 694.5   | 642.5   | 632.3   | 739.3   |
| Bbr_1763 |       | 738.8   | 957.8   | 665.9   | 723.3   | 788.3   | 306.2   | 1098.7 | 1425.1   | 1101.0  | 680.8   | 689.2   | 421.1   | 847.0   |
| Bbr_1764 | pyr   | 680.8   | 675.3   | 647.1   | 714.6   | 973.4   | 658.6   | 2842.5 | 1305.6   | 1926.1  | 1926.1  | 386.1   | 382.5   | 772.6   |
| Bbr_1765 |       | 114.1   | 111.9   | 99.2    | 106.2   | 124.8   | 179.5   | 165.0  | 540.6    | 998.6   | 402.1   | 42.2    | 82.0    | 257.3   |
| Bbr_1766 | leuD  | 2947.2  | 3757.0  | 2800.9  | 2128.8  | 2000.3  | 242.0   | 2583.3 | 639.9    | 1390.7  | 820.5   | 1469.7  | 707.7   | 2198.7  |
| Bbr_1767 | leuC  | 4061.0  | 5348.2  | 3375.5  | 2390.7  | 2722.9  | 428.2   | 3591.1 | 1009.3   | 1485.5  | 833.4   | 1163.8  | 496.0   | 2733.3  |
| Bbr_1768 |       | 339.4   | 364.9   | 319.2   | 560.5   | 309.6   | 683.4   | 355.3  | 1102.9   | 925.5   | 686.8   | 262.5   | 608.2   | 418.6   |
| Bbr_1769 |       | 1427.7  | 1140.8  | 982.0   | 1140.8  | 1052.2  | 1513.3  | 1022.3 | 1573.3   | 3342.3  | 3533.4  | 891.0   | 1505.0  | 1505.0  |
| Bbr_1770 | ppk   | 3438.2  | 3390.4  | 2921.0  | 3050.2  | 2120.0  | 1400.4  | 2268.0 | 1370.0   | 3382.1  | 6192.8  | 3256.5  | 2735.8  | 2897.6  |
| Bbr_1771 |       | 2917.7  | 2626.7  | 2691.6  | 3489.4  | 4287.8  | 10237.2 | 4456.8 | 39835.8  | 3366.3  | 7746.2  | 1714.2  | 3587.2  | 3239.1  |
| Bbr_1772 |       | 1573.4  | 1289.8  | 1416.5  | 1692.0  | 964.9   | 2691.1  | 1016.3 | 3773.7   | 2841.1  | 5925.7  | 1299.5  | 1992.7  | 1518.6  |
| Bbr_1775 |       | 71.2    | 61.3    | 52.5    | 51.2    | 53.1    | 120.5   | 82.7   | 924.7    | 1287.3  | 439.7   | 18.9    | 47.2    | 261.0   |
| Bbr_1776 |       | 67.7    | 58.3    | 60.4    | 58.6    | 59.6    | 66.3    | 87.1   | 527.0    | 1141.6  | 580.6   | 35.7    | 170.8   | 242.0   |
| Bbr_1777 | upp   | 5263.8  | 4169.6  | 4701.8  | 2763.1  | 2611.8  | 678.3   | 2744.2 | 784.1    | 7824.8  | 7550.4  | 4748.4  | 1080.1  | 4649.1  |
| Bbr_1778 |       | 1072.0  | 973.6   | 970.3   | 709.7   | 620.4   | 189.5   | 717.4  | 255.3    | 702.2   | 2751.2  | 3376.3  | 806.8   | 1250.4  |
| Bbr_1779 | glpQ  | 11762.6 | 10113.4 | 11038.1 | 6368.4  | 6689.3  | 1642.9  | 6073.2 | 1553.2   | 3459.5  | 3517.6  | 3834.7  | 7114.6  | 3911.3  |
| Bbr_1780 | glx2  | 295.1   | 268.9   | 227.6   | 264.0   | 227.6   | 828.5   | 382.4  | 2959.3   | 2416.2  | 1819.2  | 153.3   | 609.6   | 623.1   |
| Bbr_1781 | ctpB  | 453.2   | 1928.9  | 399.3   | 4987.8  | 1199.0  | 25401.5 | 1848.6 | 165350.7 | 2008.5  | 9630.6  | 308.0   | 2760.4  | 1036.1  |
| Bbr_1782 |       | 340.4   | 283.2   | 254.3   | 132.8   | 188.1   | 120.9   | 218.5  | 171.5    | 1789.2  | 1012.2  | 228.1   | 100.1   | 503.1   |
| Bbr_1783 |       | 2896.6  | 2656.0  | 2420.5  | 2646.4  | 2253.6  | 2056.3  | 2415.4 | 1364.7   | 3716.7  | 6097.6  | 2790.6  | 3191.4  | 2748.9  |
| Bbr_1784 |       | 3293.8  | 2570.3  | 2741.5  | 1774.3  | 2296.9  | 4553.8  | 2335.9 | 7765.7   | 4780.2  | 4681.6  | 2005.4  | 3201.8  | 2908.9  |
| Bbr_1785 |       | 1017.4  | 459.5   | 938.0   | 690.1   | 1090.8  | 1090.8  | 927.1  | 3740.9   | 2508.5  | 2244.5  | 538.4   | 1196.2  | 1103.3  |
| Bbr_1786 | gfl   | 1548.1  | 1836.2  | 1409.2  | 1326.1  | 816.9   | 1687.5  | 846.2  | 1292.0   | 2586.3  | 1997.1  | 1119.5  | 863.9   | 1387.7  |
| Bbr_1788 |       | 276.2   | 271.1   | 251.2   | 267.3   | 139.5   | 202.6   | 171.7  | 150.6    | 1759.2  | 1329.0  | 495.1   | 299.4   | 515.5   |
| Bbr_1789 |       | 768.8   | 757.6   | 648.8   | 566.1   | 678.4   | 329.8   | 915.0  | 1469.8   | 2406.3  | 824.7   | 424.7   | 303.9   | 973.7   |
| Bbr_1790 |       | 258.2   | 252.3   | 207.8   | 153.8   | 130.0   | 45.4    | 154.2  | 119.5    | 2115.8  | 454.7   | 644.7   | 144.4   | 585.1   |
| Bbr_1791 |       | 437.1   | 443.8   | 396.5   | 405.0   | 302.0   | 119.1   | 393.4  | 263.3    | 2353.2  | 577.4   | 656.2   | 176.6   | 756.4   |
| Bbr_1792 |       | 1969.1  | 1312.9  | 1807.3  | 1000.1  | 1000.0  | 217.3   | 1097.5 | 808.9    | 2140.5  | 534.9   | 1758.2  | 686.4   | 1628.8  |
| Bbr_1793 |       | 7104.4  | 5286.7  | 6110.9  | 3392.2  | 4685.8  | 724.1   | 5235.4 | 1566.5   | 5939.2  | 1715.5  | 6018.8  | 1839.4  | 5849.1  |
| Bbr_1794 |       | 3538.0  | 2902.8  | 3623.7  | 2358.4  | 3599.7  | 385.0   | 4790.5 | 1782.5   | 4833.3  | 1693.9  | 3093.0  | 1070.9  | 3911.3  |
| Bbr_1795 |       | 6286.7  | 5095.6  | 5584.3  | 3638.8  | 5307.2  | 754.0   | 5533.4 | 1714.3   | 5661.8  | 1969.0  | 4236.4  | 1463.5  | 5435.0  |
| Bbr_1796 |       | 2141.9  | 1978.5  | 1912.4  | 1956.9  | 1465.0  | 1114.4  | 1723.8 | 1419.3   | 3331.0  | 1798.9  | 1666.8  | 1778.3  | 2040.2  |
| Bbr_1797 | rmlA  | 7047.3  | 6082.1  | 6643.8  | 5406.3  | 4922.1  | 6526.9  | 4192.0 | 4158.1   | 7548.3  | 5996.4  | 5784.8  | 4683.9  | 6023.0  |
| Bbr_1798 | rmlCD | 5587.3  | 5868.7  | 5302.5  | 5418.4  | 3305.4  | 1723.4  | 3145.2 | 1036.3   | 7936.3  | 9856.5  | 8705.1  | 8224.0  | 5663.6  |
| Bbr_1799 | rmlB  | 3838.9  | 4380.7  | 3014.8  | 3706.9  | 2887.3  | 2513.3  | 3012.6 | 2195.2   | 5467.2  | 6486.1  | 4269.1  | 2412.5  | 3748.3  |
| Bbr_1800 |       | 602.6   | 716.8   | 514.9   | 659.8   | 291.7   | 130.3   | 334.0  | 325.7    | 1867.8  | 1112.0  | 709.5   | 566.4   | 720.1   |
| Bbr_1801 |       | 1144.3  | 1121.1  | 913.0   | 843.9   | 807.0   | 220.3   | 1032.2 | 286.2    | 2354.6  | 1652.7  | 1680.4  | 462.3   | 1332.5  |
| Bbr_1802 | lytC  | 1079.0  | 1109.9  | 901.4   | 899.9   | 614.3   | 437.4   | 645.8  | 659.1    | 3754.7  | 3068.9  | 1411.4  | 2056.8  | 1401.1  |
| Bbr_1803 |       | 3834.5  | 3871.8  | 3490.2  | 3376.9  | 2568.7  | 1167.9  | 2470.6 | 1881.1   | 7766.9  | 4577.9  | 3078.0  | 5901.7  | 3668.1  |
| Bbr_1804 |       | 3221.9  | 2701.7  | 2989.5  | 2097.3  | 3404.8  | 1098.7  | 3459.4 | 1182.9   | 2593.3  | 1537.5  | 2104.2  | 2962.2  | 2962.2  |
| Bbr_1805 |       | 4083.9  | 3712.0  | 3764.5  | 2841.8  | 2624.2  | 1156.7  | 3147.4 | 1135.0   | 3668.3  | 2245.8  | 3042.5  | 1408.4  | 3388.5  |
| Bbr_1806 |       | 479.0   | 378.4   | 443.0   | 421.4   | 421.4   | 378.5   | 492.6  | 1229.7   | 1083.5  | 1282.3  | 324.1   | 216.6   | 529.8   |
| Bbr_1807 |       | 306.3   | 370.9   | 226.0   | 338.7   | 195.3   | 104.0   | 242.9  | 215.6    | 851.0   | 716.4   | 326.4   | 867.7   | 358.0   |
| Bbr_1808 |       | 49.6    | 899.5   | 640.9   | 640.9   | 3366.4  | 4576.7  | 3366.4 | 4576.7   | 3366.4  | 3469.8  | 3469.8  | 5769.4  | 5769.4  |
| Bbr_1809 |       | 1131.2  | 1305.4  | 943.3   | 1360.6  | 619.7   | 4028.0  | 657.8  | 8913.6   | 1622.0  | 3016.3  | 1022.7  | 2820.6  | 1165.9  |
| Bbr_1810 |       | 662.7   | 267.4   | 551.5   | 122.1   | 336.6   | 235.9   | 414.7  | 285.8    | 1901.9  | 687.7   | 924.4   | 890.7   | 798.6   |
| Bbr_1811 |       | 1614.1  | 685.3   | 1350.8  | 330.9   | 1043.6  | 580.4   | 1360.5 | 2843.8   | 1803.4  | 1263.3  | 1736.6  | 2168.6  | 1484.8  |
| Bbr_1812 |       | 265.9   | 273.1   | 201.4   | 237.9   | 149.0   | 703.7   | 180.2  | 776.2    | 1656.9  | 962.3   | 185.2   | 1436.6  | 439.8   |
| Bbr_1814 | oppA3 | 42.7    | 80.4    | 31.5    | 84.6    | 28.6    | 43.6    | 41.6   | 109.4    | 693.1   | 318.1   | 16.8    | 13.6    | 142.4   |
| Bbr_1815 | oppD3 | 37.0    | 41.5    | 37.5    | 40.7    | 36.1    | 40.7    | 42.3   | 100.7    | 572.4   | 500.7   | 14.2    | 19.5    | 123.2   |
| Bbr_1816 | oppC2 | 49.6    | 49.6    | 47.2    | 49.6    | 47.2    | 49.6    | 47.2   | 49.6     | 47.2    | 49.6    | 47.2    | 49.6    | 47.2    |
| Bbr_1817 | oppB3 | 54.5    | 57.0    | 37.1    | 60.8    | 33.0    | 33.6    | 43.0   | 3        |         |         |         |         |         |

|          |       |         |         |          |         |          |         |          |         |         |         |         |         |         |
|----------|-------|---------|---------|----------|---------|----------|---------|----------|---------|---------|---------|---------|---------|---------|
| Bbr_1818 | pepC3 | 812.1   | 1429.5  | 681.1    | 1240.3  | 954.1    | 348.4   | 882.6    | 667.8   | 1579.6  | 1815.6  | 737.2   | 455.4   | 941.1   |
| Bbr_1819 |       | 694.5   | 582.7   | 582.7    | 417.4   | 457.6    | 5641.2  | 487.7    | 9185.4  | 1679.0  | 1527.8  | 876.6   | 2116.9  | 796.3   |
| Bbr_1820 | metG  | 3280.0  | 3519.4  | 2696.1   | 3283.6  | 2841.3   | 958.3   | 2769.4   | 907.4   | 2751.8  | 2845.8  | 2918.8  | 1799.7  | 2876.2  |
| Bbr_1821 |       | 45.5    | 28.4    | 38.5     | 23.0    | 45.4     | 12.8    | 49.4     | 25.7    | 1206.1  | 596.0   | 50.5    | 11.7    | 239.2   |
| Bbr_1822 |       | 69.0    | 42.1    | 61.5     | 31.0    | 56.6     | 17.9    | 70.8     | 100.1   | 2003.2  | 629.2   | 71.4    | 29.7    | 388.8   |
| Bbr_1823 |       | 771.2   | 684.7   | 684.7    | 684.7   | 507.8    | 596.5   | 634.4    | 541.1   | 1204.1  | 2029.8  | 648.4   | 1849.9  | 741.8   |
| Bbr_1824 |       | 649.2   | 684.8   | 562.1    | 596.1   | 509.4    | 1377.7  | 509.8    | 351.9   | 850.5   | 781.0   | 252.2   | 164.7   | 555.5   |
| Bbr_1825 |       | 290.9   | 277.6   | 230.9    | 286.6   | 127.5    | 197.6   | 327.5    | 530.5   | 2167.6  | 1916.7  | 237.4   | 259.2   | 563.6   |
| Bbr_1826 |       | 239.0   | 450.5   | 269.9    | 2417.9  | 506.2    | 9821.3  | 227.0    | 587.7   | 1306.3  | 3173.5  | 184.5   | 473.3   | 455.5   |
| Bbr_1827 |       | 535.0   | 1029.8  | 594.4    | 4892.9  | 903.8    | 30774.3 | 343.8    | 2213.8  | 1396.5  | 4630.4  | 238.7   | 1314.0  | 668.7   |
| Bbr_1828 |       | 322.6   | 260.5   | 260.5    | 1557.7  | 830.8    | 32360.1 | 347.1    | 17698.9 | 1771.3  | 1959.7  | 173.9   | 592.4   | 617.7   |
| Bbr_1830 | maa   | 624.9   | 599.6   | 541.0    | 409.9   | 335.9    | 154.3   | 398.9    | 155.9   | 1501.3  | 866.7   | 596.0   | 223.3   | 666.3   |
| Bbr_1831 |       | 577.5   | 658.8   | 480.4    | 451.3   | 258.2    | 240.9   | 331.8    | 216.8   | 2334.0  | 1381.6  | 452.9   | 198.6   | 739.1   |
| Bbr_1832 |       | 137.2   | 113.5   | 91.1     | 42.7    | 138.8    | 47.9    | 189.6    | 127.9   | 1407.1  | 276.2   | 186.8   | 464.5   | 358.4   |
| Bbr_1833 | lacZ7 | 130.1   | 119.0   | 93.0     | 59.2    | 80.7     | 161.8   | 112.4    | 137.4   | 1187.7  | 263.6   | 143.8   | 449.8   | 291.3   |
| Bbr_1834 | rbsC2 | 109.9   | 92.6    | 84.2     | 71.9    | 63.3     | 59.9    | 83.0     | 105.3   | 1348.8  | 317.3   | 71.9    | 88.4    | 293.5   |
| Bbr_1835 | rbsA2 | 57.6    | 55.8    | 44.1     | 34.4    | 40.3     | 54.7    | 50.4     | 108.2   | 865.6   | 218.6   | 54.4    | 94.6    | 185.4   |
| Bbr_1836 |       | 119.2   | 102.9   | 87.6     | 51.4    | 96.6     | 87.3    | 96.6     | 136.5   | 1058.4  | 338.7   | 94.6    | 219.0   | 259.6   |
| Bbr_1839 | aap5  | 691.6   | 727.8   | 600.8    | 767.1   | 410.8    | 488.9   | 446.1    | 671.5   | 1214.6  | 1009.9  | 442.4   | 369.8   | 634.4   |
| Bbr_1840 |       | 1837.3  | 1077.0  | 1636.5   | 637.6   | 872.0    | 46.2    | 1060.5   | 116.1   | 1681.5  | 1120.4  | 457.8   | 91.1    | 1257.6  |
| Bbr_1841 |       | 2668.1  | 2092.0  | 2497.9   | 1755.4  | 3804.4   | 4030.3  | 4332.1   | 15833.5 | 3099.9  | 4542.6  | 642.1   | 1599.3  | 2835.7  |
| Bbr_1842 | aap6  | 727.4   | 1099.4  | 609.9    | 744.7   | 425.1    | 202.3   | 592.5    | 324.7   | 2222.1  | 948.5   | 182.1   | 611.5   | 1066.3  |
| Bbr_1843 |       | 12734.9 | 6564.9  | 10564.4  | 1165.4  | 8143.0   | 1985.7  | 6940.2   | 1205.3  | 3742.3  | 1693.7  | 808.1   | 476.6   | 7155.5  |
| Bbr_1844 |       | 36640.0 | 15628.3 | 32429.9  | 2938.0  | 28081.2  | 4228.9  | 25298.6  | 2866.7  | 7341.9  | 3327.0  | 1769.2  | 1193.9  | 21926.8 |
| Bbr_1845 |       | 53017.5 | 21214.1 | 40867.7  | 4362.5  | 36862.9  | 7556.4  | 29307.8  | 6679.2  | 7220.5  | 3721.6  | 1711.4  | 1510.1  | 28164.6 |
| Bbr_1846 |       | 979.1   | 822.7   | 852.3    | 553.8   | 480.8    | 795.5   | 495.0    | 384.5   | 2075.2  | 1977.2  | 584.5   | 1172.0  | 911.2   |
| Bbr_1847 |       | 85677.8 | 36301.2 | 127787.2 | 7981.5  | 145504.8 | 3996.4  | 164047.3 | 6200.1  | 40532.9 | 6978.0  | 12648.3 | 7685.5  | 96033.0 |
| Bbr_1848 |       | 267.4   | 1421.6  | 307.7    | 1421.6  | 2074.9   | 325.4   | 2245.2   | 1317.0  | 2245.2  | 1810.5  | 34283.9 | 2288.2  | 30289.9 |
| Bbr_1849 |       | 1846.7  | 1509.8  | 1595.0   | 1340.4  | 1131.4   | 1318.0  | 1268.8   | 1930.3  | 1989.5  | 2473.9  | 1017.7  | 351.3   | 1474.9  |
| Bbr_1850 |       | 20656.3 | 15367.8 | 22892.0  | 13796.0 | 14752.9  | 4439.7  | 5346.3   | 7226.4  | 19056.5 | 5874.9  | 1396.1  | 14024.7 | 14024.7 |
| Bbr_1851 | pip1  | 4270.6  | 2537.3  | 3914.8   | 1706.7  | 2460.1   | 201.5   | 3005.5   | 326.3   | 2457.9  | 3966.2  | 1081.6  | 190.6   | 2865.1  |
| Bbr_1852 | pip2  | 3765.4  | 2385.1  | 3267.8   | 1206.8  | 3735.9   | 205.4   | 4287.0   | 547.9   | 1372.6  | 1925.4  | 403.1   | 108.3   | 2805.3  |
| Bbr_1853 |       | 1204.2  | 1592.0  | 1084.4   | 1822.9  | 1433.2   | 796.0   | 1676.7   | 815.6   | 1049.1  | 1049.1  | 772.4   | 2606.8  | 1203.3  |
| Bbr_1854 | tdcB  | 1955.7  | 2336.7  | 1618.5   | 2081.9  | 940.6    | 1276.9  | 900.0    | 443.3   | 1146.7  | 1806.1  | 1308.9  | 458.8   | 1311.7  |
| Bbr_1855 |       | 405.8   | 2092.0  | 285.9    | 624.9   | 347.0    | 168.5   | 347.0    | 410.2   | 585.4   | 324.6   | 97.5    | 374.4   | 405.8   |
| Bbr_1856 |       | 135.0   | 144.3   | 107.3    | 104.8   | 127.7    | 79.9    | 166.5    | 222.6   | 662.0   | 282.9   | 107.2   | 77.4    | 217.6   |
| Bbr_1857 |       | 150.6   | 177.9   | 109.7    | 159.5   | 152.2    | 132.4   | 164.5    | 376.6   | 365.6   | 408.3   | 113.5   | 128.2   | 172.7   |
| Bbr_1858 |       | 142.0   | 142.1   | 137.5    | 194.1   | 72.8     | 201.6   | 87.2     | 183.0   | 1344.8  | 711.4   | 142.5   | 83.6    | 321.1   |
| Bbr_1859 |       | 110.7   | 123.8   | 89.0     | 150.2   | 85.6     | 196.4   | 119.1    | 91.0    | 928.8   | 704.6   | 128.1   | 74.5    | 243.6   |
| Bbr_1860 |       | 347.1   | 366.2   | 307.3    | 644.7   | 213.0    | 1832.0  | 238.7    | 3727.4  | 2909.8  | 1230.3  | 412.2   | 286.9   | 738.0   |
| Bbr_1861 |       | 409.8   | 585.1   | 397.6    | 1470.1  | 232.9    | 1700.9  | 246.9    | 549.5   | 2087.5  | 1188.3  | 466.7   | 242.2   | 640.3   |
| Bbr_1862 |       | 960.0   | 1050.3  | 902.3    | 3705.1  | 690.4    | 1092.5  | 630.4    | 3119.9  | 2047.2  | 916.9   | 771.7   | 1303.6  | 1303.6  |
| Bbr_1863 |       | 408.7   | 567.3   | 371.1    | 863.1   | 360.6    | 1075.2  | 449.0    | 1495.0  | 3019.6  | 976.9   | 308.6   | 324.6   | 819.6   |
| Bbr_1864 |       | 346.1   | 506.7   | 289.6    | 632.5   | 249.1    | 392.7   | 338.2    | 656.8   | 1431.8  | 869.0   | 286.2   | 180.9   | 490.2   |
| Bbr_1865 |       | 83.2    | 46.3    | 70.8     | 41.4    | 69.0     | 47.2    | 93.2     | 61.9    | 1306.6  | 498.8   | 141.1   | 59.5    | 294.0   |
| Bbr_1866 |       | 132.4   | 42.0    | 120.8    | 32.9    | 148.5    | 112.6   | 188.1    | 188.2   | 1156.4  | 325.9   | 172.2   | 106.5   | 319.8   |
| Bbr_1867 |       | 240.5   | 126.5   | 203.5    | 104.6   | 276.5    | 612.3   | 303.4    | 782.1   | 1214.7  | 615.8   | 198.7   | 129.6   | 406.2   |
| Bbr_1868 |       | 223.1   | 183.6   | 243.7    | 151.9   | 126.1    | 182.8   | 155.1    | 574.4   | 727.2   | 424.1   | 224.8   | 149.5   | 273.3   |
| Bbr_1869 | aga   | 1207.0  | 819.3   | 1008.0   | 1008.0  | 1949.9   | 388.9   | 887.9    | 484.3   | 1655.1  | 624.8   | 951.2   | 540.6   | 1078.9  |
| Bbr_1870 | mesJ  | 503.3   | 498.0   | 461.9    | 515.6   | 752.4    | 1069.5  | 492.1    | 5250.2  | 1715.2  | 1324.0  | 282.0   | 660.4   | 1981.3  |
| Bbr_1871 | nhaP  | 941.5   | 1015.9  | 854.9    | 1046.7  | 560.8    | 556.5   | 579.6    | 771.5   | 2648.3  | 1640.4  | 563.4   | 265.5   | 1024.7  |
| Bbr_1872 |       | 97.3    | 96.2    | 73.7     | 78.8    | 90.7     | 161.4   | 117.0    | 465.6   | 2101.7  | 832.7   | 90.8    | 249.3   | 428.5   |
| Bbr_1873 |       | 1189.8  | 757.2   | 903.6    | 371.3   | 639.8    | 492.7   | 719.0    | 458.2   | 2223.9  | 1364.3  | 956.8   | 1105.5  | 1105.5  |
| Bbr_1874 |       | 5163.4  | 3573.7  | 4472.1   | 2644.9  | 3903.4   | 10842.6 | 3693.9   | 28329.0 | 3886.6  | 2997.9  | 2620.4  | 1212.5  | 3956.6  |
| Bbr_1875 | dcd   | 1905.9  | 2027.2  | 1763.7   | 2116.6  | 1072.5   | 1577.0  | 1045.5   | 1008.9  | 5001.9  | 3549.6  | 1560.9  | 733.8   | 2058.4  |
| Bbr_1876 |       | 1926.3  | 1992.2  | 1757.9   | 1949.9  | 813.6    | 602.3   | 697.3    | 349.2   | 3286.6  | 2854.0  | 2040.1  | 1353.8  | 1787.6  |
| Bbr_1877 | pacL2 | 1635.8  | 773.6   | 1362.4   | 379.8   | 870.0    | 942.2   | 1070.7   | 1070.7  | 4422.6  | 2754.3  | 2882.5  | 2200.6  | 1981.3  |
| Bbr_1878 |       | 1590.6  | 658.4   | 1244.3   | 658.4   | 841.5    | 913.9   | 966.9    | 639.4   | 928.8   | 639.4   | 1612.3  | 1327.6  | 1122.0  |
| Bbr_1879 |       | 2684.1  | 1253.0  | 2322.0   | 580.0   | 2660.4   | 1487.0  | 3051.3   | 4455.4  | 2227.9  | 1437.8  | 3290.2  | 2582.9  | 2706.0  |
| Bbr_1880 |       | 1723.9  | 702.8   | 1495.2   | 152.8   | 1206.3   | 424.5   | 1608.8   | 377.7   | 676.6   | 1151.8  | 2363.1  | 1376.9  | 1512.3  |
| Bbr_1881 |       | 64.3    | 65.0    | 52.3     | 53.8    | 53.6     | 54.8    | 70.2     | 63.6    | 449.7   | 384.3   | 59.6    | 36.8    | 124.9   |
| Bbr_1882 |       | 1729.3  | 1529.9  | 1444.5   | 1301.9  | 1090.6   | 985.6   | 1291.7   | 796.2   | 2279.3  | 4108.5  | 2362.3  | 1699.6  | 1699.6  |
| Bbr_1883 |       | 700.8   | 721.4   | 621.5    | 557.1   | 648.6    | 1416.7  | 855.8    | 2115.6  | 1085.5  | 753.3   | 618.5   | 359.6   | 755.1   |
| Bbr_1884 | galT2 | 653.7   | 881.6   | 881.6    | 881.6   | 1020.2   | 1537.6  | 1708.4   | 284.2   | 1774.3  | 1872.1  | 631.1   | 318.1   | 715.4   |
| Bbr_1885 |       | 1537.7  | 1505.5  | 1327.1   | 1055.0  | 769.2    | 417.5   | 857.9    | 459.8   | 3240.4  | 2697.4  | 2028.1  | 971.2   | 1626.7  |
| Bbr_1886 |       | 214.6   | 225.9   | 163.1    | 131.0   | 165.8    | 75.1    | 225.8    | 200.3   | 1330.2  | 334.9   | 100.0   | 64.9    | 366.6   |
| Bbr_1887 |       | 462.6   | 529.3   | 404.3    | 389.2   | 375.8    | 301.8   | 553.6    | 1709.8  | 1696.6  | 522.3   | 164.2   | 629.3   | 629.3   |
| Bbr_1888 |       | 1150.5  | 1336.5  | 1004.0   | 911.6   | 1434.0   | 162.7   | 1342.1   | 908.0   | 2114.3  | 608.0   | 638.2   | 180.8   | 1280.5  |
| Bbr_1889 |       | 382.4   | 957.0   | 359.5    | 404.7   | 184.2    | 63.4    | 215.4    | 151.0   | 895.7   | 445.0   | 159.8   | 57.2    | 366.2   |
| Bbr_1890 |       | 49814.8 | 18574.5 | 49324.1  | 6851.7  | 45369.2  | 3666.5  | 49424.9  | 11946.3 | 35894.6 | 15109.0 | 77085.1 | 15454.9 | 51152.1 |
| Bbr_1891 |       | 1376.4  | 1852.2  | 1687.1   | 1852.2  | 1687.1   | 2212.2  | 1708.4   | 2655.5  | 4032.8  | 3590.7  | 850.0   | 2690.0  | 2690.0  |
| Bbr_1892 |       | 11507.9 | 4198.2  | 10001.7  | 1347.2  | 10002.9  | 7497.6  | 7697.3   | 2282.1  | 17689.5 | 4230.8  | 351.4   | 291.5   | 9541.8  |
| Bbr_1893 |       | 9191.8  | 3295.0  | 8117.3   | 993.1   | 8850.6   | 8453.6  | 7532.3   | 3936.5  | 25228.8 | 7245.0  | 309.7   | 282.4   | 9871.8  |
| Bbr_1894 |       | 16524.9 | 6296.9  | 15585.1  | 1697.5  | 18241.4  | 15052.5 | 20394.7  | 36887.7 | 41228.5 | 17311.3 | 337.4   | 445.1   | 18718.7 |
| Bbr_1895 |       | 280.1   | 316.3   | 250.0    | 249.6   | 200.1    | 120.6   | 313.7    | 185.9   | 977.1   | 1101.3  | 227.8   | 105.5   | 374.8   |
| Bbr_1896 | virR  | 701.5   | 589.5   | 678.4    | 574.1   | 964.9    | 1232.6  | 882.6    | 4981.1  | 2261.0  | 2754.8  | 567.2   | 1009.3  | 1009.3  |
| Bbr_1897 | virS  | 437.1   | 397.3   | 336.6    | 265.6   | 211.5    | 237.0   | 248.9    | 358.8   | 906.3   | 984.2   | 295.8   | 134.8   | 406.1   |
| Bbr_1898 | ntf   | 620.7   | 484.6   | 484.6    | 484.6   | 321.1    | 357.6   | 484.6    | 413.6   | 2034.5  | 1813.6  | 618.7   | 774.8   | 774.8   |
| Bbr_1899 | ntfE  | 867.4   | 646.5   | 756.9    | 455.4   | 520.7    | 247.9   | 658.2    | 380.8   | 2385.5  | 1727.7  | 1024.8  | 2805.2  | 1035.6  |

|          |          |         |         |         |         |         |         |         |         |         |         |         |         |         |
|----------|----------|---------|---------|---------|---------|---------|---------|---------|---------|---------|---------|---------|---------|---------|
| Bbr_1900 | nrdf     | 2278.9  | 1522.1  | 2011.8  | 1312.2  | 1628.5  | 1854.1  | 1663.7  | 1107.3  | 3912.9  | 3160.1  | 5726.5  | 19978.7 | 2870.4  |
| Bbr_1901 | nrdfH    | 2959.2  | 1872.5  | 2582.2  | 1526.4  | 2278.9  | 2501.2  | 2113.0  | 1834.1  | 2796.7  | 3082.0  | 5922.0  | 12755.0 | 3108.7  |
| Bbr_1902 |          | 122.0   | 185.0   | 99.0    | 414.1   | 100.2   | 177.0   | 129.4   | 258.5   | 1139.0  | 574.2   | 99.0    | 64.8    | 281.4   |
| Bbr_1903 | bgf4     | 137.5   | 203.3   | 126.1   | 516.4   | 149.0   | 143.8   | 150.0   | 257.4   | 1033.9  | 789.4   | 110.7   | 83.3    | 284.5   |
| Bbr_1904 |          | 331.6   | 285.5   | 279.9   | 283.7   | 280.4   | 545.7   | 336.7   | 863.8   | 1164.1  | 413.5   | 170.9   | 623.4   | 427.3   |
| Bbr_1905 |          | 264.3   | 295.5   | 208.5   | 235.8   | 140.2   | 227.4   | 186.5   | 267.0   | 7721.1  | 5300.0  | 2220.8  | 193.4   | 1445.0  |
| Bbr_1906 |          | 90.9    | 89.2    | 81.1    | 94.2    | 64.4    | 121.8   | 92.5    | 287.9   | 654.9   | 231.4   | 17.6    | 168.9   | 168.9   |
| Bbr_1907 | bgf5     | 143.3   | 202.9   | 119.7   | 215.8   | 170.4   | 297.8   | 232.4   | 1988.4  | 2151.1  | 708.8   | 230.1   | 451.0   | 507.8   |
| Bbr_1908 |          | 487.6   | 446.6   | 380.7   | 427.7   | 417.1   | 111.2   | 563.0   | 234.4   | 694.7   | 1201.1  | 248.9   | 278.7   | 465.3   |
| Bbr_1909 |          | 4417.3  | 5102.5  | 3730.2  | 6349.5  | 2715.9  | 3218.7  | 2645.5  | 761.3   | 5503.7  | 7136.8  | 2119.9  | 1829.1  | 3522.1  |
| Bbr_1910 |          | 1613.3  | 1888.8  | 1412.3  | 1758.8  | 736.0   | 400.1   | 784.1   | 160.7   | 3575.2  | 2036.0  | 2159.4  | 2364.3  | 1713.4  |
| Bbr_1911 | ksgA     | 1210.1  | 1356.1  | 1024.0  | 1264.4  | 584.0   | 236.3   | 657.6   | 199.5   | 3010.0  | 1816.1  | 1224.2  | 974.9   | 1285.0  |
| Bbr_1912 | ispE     | 1755.1  | 1779.9  | 1441.4  | 1455.1  | 1223.9  | 177.0   | 1527.1  | 550.3   | 2489.4  | 1348.0  | 1307.6  | 889.0   | 1624.1  |
| Bbr_1913 |          | 2318.0  | 2146.8  | 2001.4  | 1616.9  | 1322.7  | 689.0   | 1700.2  | 566.7   | 4698.3  | 2768.5  | 2251.1  | 1380.3  | 2498.6  |
| Bbr_1914 | pcnA     | 1068.5  | 1128.7  | 852.9   | 997.0   | 596.8   | 1751.9  | 632.3   | 1560.8  | 2292.4  | 1726.4  | 945.0   | 532.9   | 1064.6  |
| Bbr_1915 |          | 1570.4  | 1400.3  | 1458.6  | 1542.4  | 1507.7  | 1107.1  | 1537.4  | 1170.9  | 2675.5  | 3767.3  | 1422.8  | 1319.2  | 1695.4  |
| Bbr_1916 |          | 1063.0  | 1074.4  | 974.0   | 926.7   | 777.9   | 122.1   | 962.8   | 410.1   | 3256.1  | 2322.5  | 1149.2  | 653.4   | 1363.8  |
| Bbr_1917 |          | 2888.2  | 2879.5  | 2420.0  | 2272.1  | 1420.7  | 422.4   | 1579.8  | 271.1   | 4240.4  | 2898.1  | 3094.7  | 731.9   | 2607.3  |
| Bbr_1918 | trxB2    | 2400.1  | 2097.4  | 2168.7  | 2733.7  | 1638.9  | 6832.0  | 1336.5  | 1061.3  | 3432.4  | 2700.2  | 894.4   | 992.7   | 1978.5  |
| Bbr_1919 | parB2    | 2946.8  | 3345.9  | 2620.8  | 2687.9  | 1536.8  | 828.2   | 1525.7  | 400.0   | 1693.4  | 905.3   | 1875.9  | 810.7   | 2033.2  |
| Bbr_1920 | parA3    | 1949.4  | 1765.7  | 1495.3  | 1497.4  | 982.3   | 1664.4  | 965.3   | 1229.5  | 3043.8  | 1067.4  | 1582.8  | 1224.1  | 1669.8  |
| Bbr_1921 | gidB     | 2157.4  | 1735.5  | 1653.9  | 1082.4  | 1224.6  | 1415.4  | 1177.1  | 986.6   | 3181.1  | 683.1   | 1835.2  | 648.4   | 1871.6  |
| Bbr_1922 | jaq      | 3624.4  | 2763.1  | 3057.8  | 1614.1  | 1342.4  | 918.5   | 1350.8  | 540.1   | 2926.4  | 1292.9  | 2623.2  | 705.9   | 2487.5  |
| Bbr_1923 | YidC     | 2021.8  | 1918.6  | 2215.1  | 1823.1  | 932.5   | 986.8   | 1055.9  | 346.3   | 3707.3  | 1642.0  | 3359.5  | 5408.7  | 2215.3  |
| Bbr_1924 |          | 2893.3  | 2906.3  | 2957.0  | 2902.3  | 3616.0  | 2922.8  | 4310.2  | 3755.2  | 6415.9  | 3047.7  | 3795.9  | 10765.1 | 3998.0  |
| Bbr_1925 | mpA      | 10600.3 | 11539.3 | 8967.9  | 12006.0 | 8008.5  | 10675.9 | 6747.8  | 7136.5  | 9402.0  | 6734.9  | 8706.8  | 17457.3 | 8738.9  |
| Bbr_1926 | rpmH     | 12503.6 | 12954.3 | 12347.0 | 14021.5 | 12142.0 | 9762.1  | 10822.8 | 11118.8 | 14168.1 | 10882.0 | 10584.6 | 17061.8 | 12094.7 |
|          | tRNA-Glu | 10301.8 | 4565.6  | 8853.1  | 5100.2  | 8591.6  | 1945.9  | 5806.1  | 1512.2  | 8623.3  | 2425.1  | 26624.3 | 19910.0 | 11133.4 |
|          | tRNA-Gln | 3910.1  | 2711.8  | 3340.3  | 2347.5  | 2807.8  | 654.5   | 3043.5  | 1680.4  | 3629.6  | 1016.6  | 2290.4  | 1851.6  | 3170.3  |
|          | tRNA-Cys | 1771.6  | 1268.3  | 1512.0  | 2103.5  | 1253.2  | 2456.5  | 1253.1  | 1846.4  | 3808.5  | 3062.1  | 1347.9  | 4279.1  | 1824.4  |
|          | tRNA-His | 1154.9  | 700.5   | 872.4   | 690.0   | 815.9   | 717.2   | 967.7   | 2600.8  | 1772.0  | 843.1   | 340.2   | 791.9   | 987.2   |
|          | tRNA-Asp | 1145.9  | 867.6   | 950.7   | 981.7   | 673.6   | 1393.4  | 732.9   | 2171.4  | 2898.8  | 1464.6  | 464.6   | 984.0   | 1144.4  |
|          | tRNA-Trp | 1072.7  | 916.7   | 1039.2  | 1271.1  | 600.8   | 1236.5  | 616.6   | 1263.3  | 2449.8  | 2343.1  | 737.4   | 4148.1  | 1086.1  |
|          | tRNA-Leu | 1015.1  | 832.1   | 833.9   | 925.1   | 935.9   | 2013.6  | 1000.6  | 2080.6  | 876.0   | 1033.7  | 392.2   | 4471.5  | 842.3   |
|          | tRNA-Ala | 814.4   | 873.1   | 816.7   | 656.9   | 852.7   | 784.5   | 725.7   | 2352.8  | 1473.9  | 868.7   | 396.9   | 914.3   | 814.1   |
|          | tRNA-Met | 728.1   | 561.5   | 711.4   | 719.9   | 361.3   | 924.3   | 395.5   | 1170.7  | 2464.7  | 1593.0  | 366.4   | 3666.3  | 837.9   |
|          | tRNA-Val | 720.1   | 671.0   | 567.8   | 778.3   | 703.3   | 865.9   | 646.9   | 865.9   | 1296.9  | 1474.1  | 490.3   | 585.5   | 708.2   |
|          | tRNA-Gly | 624.5   | 351.4   | 506.5   | 453.5   | 433.5   | 961.9   | 530.7   | 306.0   | 1974.7  | 1714.7  | 165.9   | 799.0   | 706.0   |
|          | tRNA     | 619.6   | 544.2   | 564.8   | 511.5   | 675.5   | 1644.3  | 689.3   | 5765.6  | 1149.5  | 677.9   | 223.5   | 976.8   | 626.4   |
|          | tRNA-Asn | 554.9   | 474.9   | 436.7   | 654.6   | 269.6   | 1720.0  | 283.7   | 4635.5  | 1685.6  | 1096.8  | 279.6   | 1062.7  | 585.0   |
|          | tRNA-Phe | 525.6   | 385.9   | 425.5   | 492.6   | 327.0   | 1677.8  | 317.2   | 2029.9  | 1151.9  | 1071.0  | 286.0   | 898.8   | 505.6   |
|          | tRNA-Thr | 334.4   | 326.5   | 283.8   | 378.6   | 227.5   | 162.6   | 307.2   | 261.1   | 1958.3  | 1237.8  | 224.2   | 201.4   | 555.9   |
|          | tRNA-Pro | 252.7   | 263.5   | 227.5   | 473.6   | 166.2   | 1238.0  | 195.1   | 722.4   | 472.3   | 457.2   | 71.4    | 172.0   | 230.9   |
|          | tRNA-Lys | 242.7   | 194.5   | 234.6   | 278.9   | 149.7   | 894.9   | 228.3   | 6582.1  | 1175.1  | 631.5   | 124.3   | 485.2   | 359.1   |
|          | tRNA-Ser | 235.2   | 142.3   | 201.0   | 202.5   | 175.6   | 219.9   | 228.6   | 769.0   | 758.2   | 779.5   | 90.3    | 304.3   | 281.5   |
|          | tRNA-Arg | 185.7   | 153.9   | 125.0   | 180.4   | 103.5   | 510.4   | 118.9   | 286.1   | 976.3   | 1269.4  | 129.1   | 249.4   | 273.1   |
|          | tRNA-Tyr | 91.0    | 75.9    | 55.9    | 62.9    | 64.7    | 67.1    | 74.5    | 174.0   | 839.4   | 435.9   | 30.7    | 22.7    | 192.7   |
|          | rRNA16s  | 11.2    | 20.1    | 5.8     | 20.9    | 6.9     | 8.5     | 10.8    | 9.5     | 521.3   | 1920.3  | 11.2    | 4.8     | 94.5    |
