# Supplementary material
Source: PubMed Central journal article supplement (PMC2772463)

## Growth of *B. breve* UCC2003 exposed to various stresses

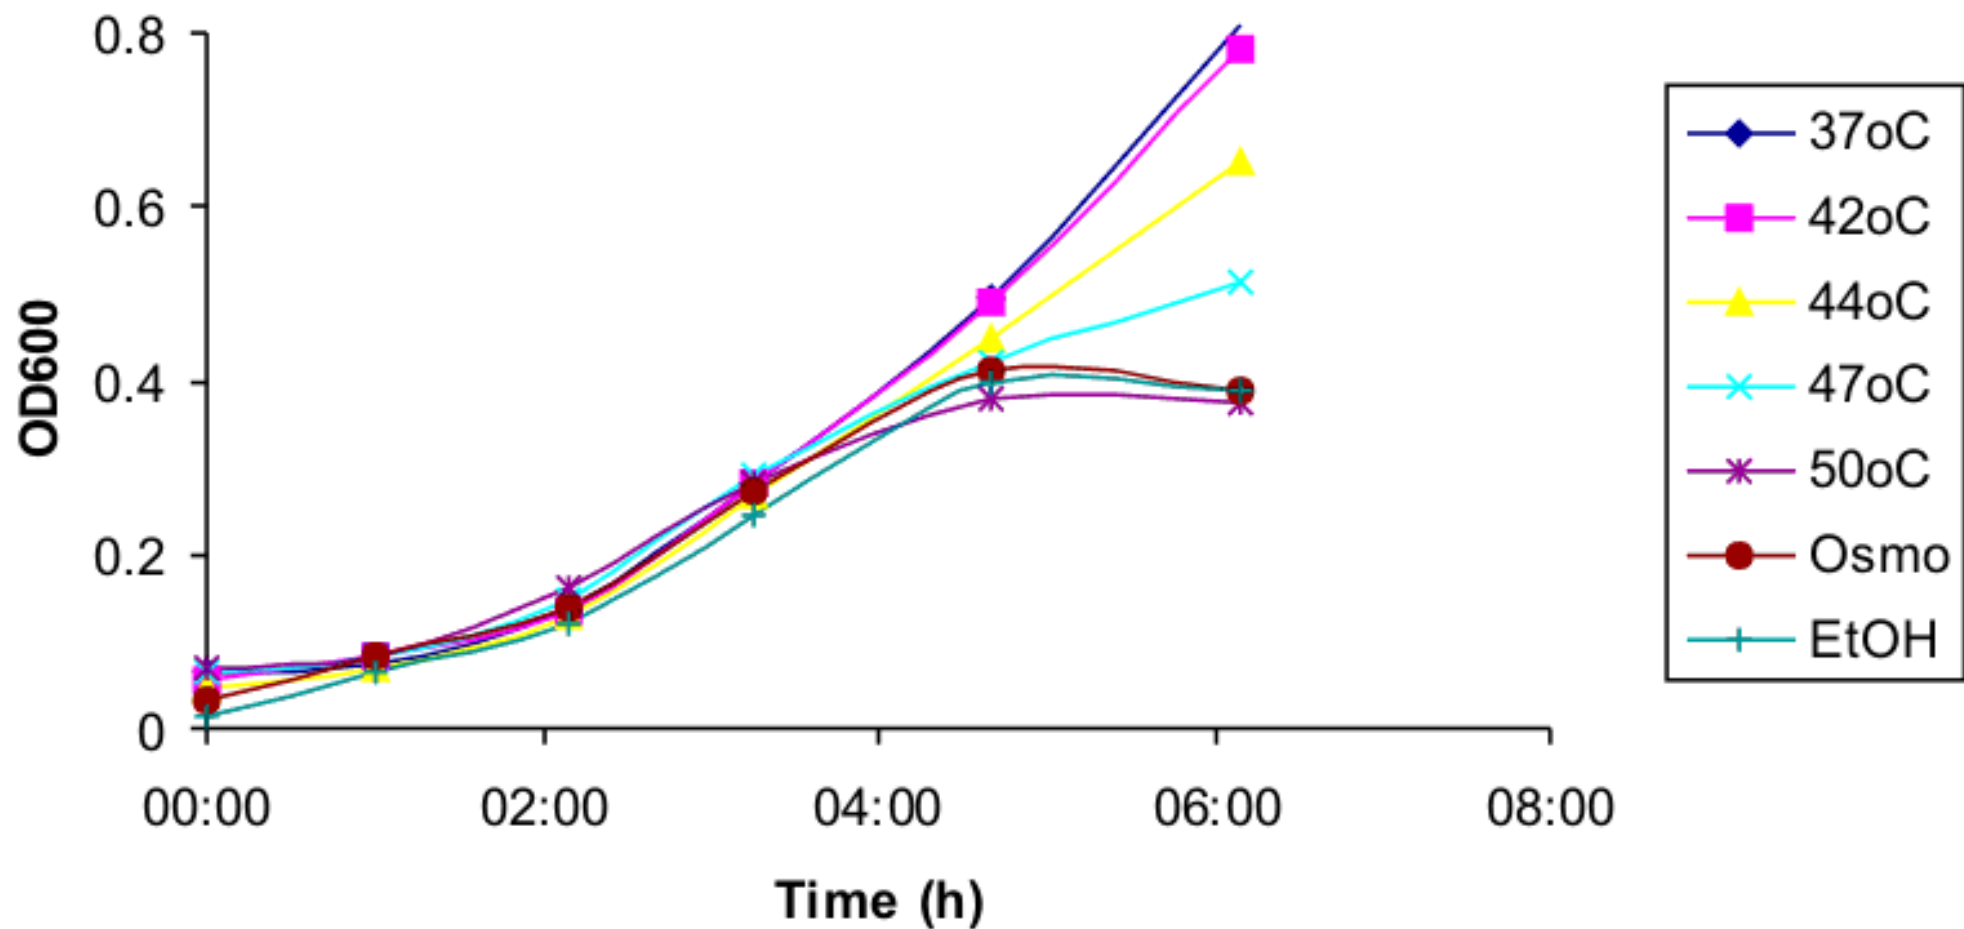

Supplement: supp_191_22_7039__4.pdf [file supp_191_22_7039__4.pdf]
